# Supplementary material for: Transition-metal-free four-component reaction of nitriles and disulfides/diselenides
Source: Royal Society of Chemistry journal article supplement (doi:10.1039/d3cc05416k), 2023-12-18
Supplement: d3cc05416k1.pdf [file d3cc05416k1.pdf]

## *Supporting Information*

### **Transition-Metal-Free four-component reaction of nitriles and disulfides/diselenides**

Hui-Hui Wang, Yang-Yun Zhu, Chuan-Li Chen, Xiao-Bo Huang, Miao-  
Chang Liu, Yun-Bing Zhou,\* and Hua-Yue Wu\*

College of Chemistry and Materials Engineering, Wenzhou University, Wenzhou,  
325035, P. R. of China

#### **Table of Contents**

|                                                                                         |            |
|-----------------------------------------------------------------------------------------|------------|
| <b>1. General Information-----</b>                                                      | <b>S2</b>  |
| <b>2. Optimization of the Reaction Conditions-----</b>                                  | <b>S3</b>  |
| <b>3. Crystal Data and Structure Refinement of Products-----</b>                        | <b>S4</b>  |
| <b>4. General Experimental Procedures and the Control<br/>Experiments-----</b>          | <b>S7</b>  |
| <b>5. Characterization of Products in Details-----</b>                                  | <b>S11</b> |
| <b>6. <sup>1</sup>H, <sup>13</sup>C and <sup>19</sup>F NMR Spectra of Products-----</b> | <b>S27</b> |
| <b>7. References-----</b>                                                               | <b>S59</b> |

## 1. General Information

All reagents and solvents were purchased from Energy Chemical, Sigma-Aldrich, Bidepharm, Macklin and Meryer. All reactions were conducted using standard Schlenk techniques. Column chromatography was performed using Aluminium oxide neutral (200–300 mesh).  $^1\text{H}$  NMR spectra were measured on a 400 MHz Oxford Instruments spectrometer (400 MHz for  $^1\text{H}$ , 100 MHz for  $^{13}\text{C}$ ) and  $^{13}\text{C}$  NMR spectra were measured on a 500 MHz Bruker AVANCE spectrometer (500 MHz for  $^1\text{H}$ , 125 MHz for  $^{13}\text{C}$ , 471 MHz for  $^{19}\text{F}$ ), using  $\text{CDCl}_3$  as the solvent with tetramethylsilane (TMS) as the internal standard at room temperature. Chemical shifts were reported in ppm.  $^1\text{H}$  NMR spectra was referenced to  $\text{CDCl}_3$  (7.26 ppm), and  $^{13}\text{C}$ -NMR spectra was referenced to  $\text{CDCl}_3$  (77.0 ppm), and  $^{19}\text{F}$  -NMR spectra was referenced to  $\text{CDCl}_3$ . Peak multiplicities were designated by the following abbreviations: s, singlet; d, doublet; t, triplet; m, multiplet. Chemical shifts are given in  $\delta$  relative to TMS, the coupling constants J are given in Hz. Analysis of crude reaction mixture was done on the Varian 4000 GC/MS and Agilent 7890A/5975C. High-resolution mass spectra were recorded on a micrOTOF-Q II 10410 mass spectrometer. A 15 W UV light and a 500 W super high-pressure mercury lamp were used for photoirradiation. Unless otherwise noted, all reagents and solvents were obtained commercially and used without further purification. The disulfides<sup>[1]</sup>/diselenides<sup>[2]</sup> were prepared according to the corresponding literature procedures.

## 2. Optimization of the Reaction Conditions

Table S1: Optimization of Reaction Conditions for the reaction of 1,2-di-*p*-tolylidysulfane with mixed nitriles.<sup>[a]</sup>

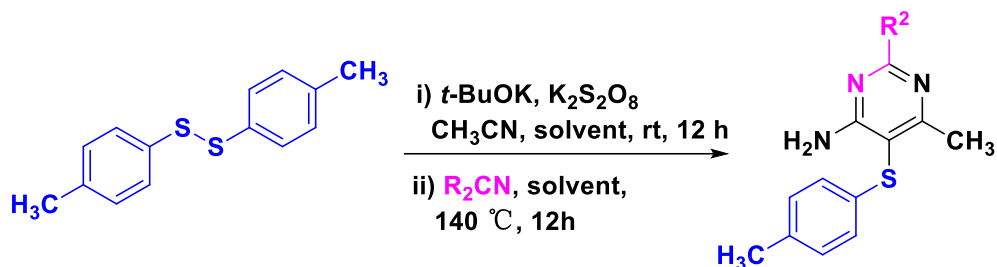

| Number | Solvent     | Yield (%) <sup>[b]</sup> |
|--------|-------------|--------------------------|
| 1      | DMSO        | 28                       |
| 2      | DMF         | 32                       |
| 3      | 1,4-dioxane | 71                       |
| 4      | Toluene     | 65                       |
| 5      | cyclohexane | 74                       |
| 6      | DME         | 90                       |

<sup>[a]</sup>Reaction conditions: i) 1,2-di-*p*-tolylidysulfane (0.2 mmol), CH<sub>3</sub>CN (0.6 mL), *t*-BuOK (0.4 mmol), K<sub>2</sub>S<sub>2</sub>O<sub>8</sub> (0.4 mmol), DME (1.0 mL), air, rt, 12 h; R<sup>2</sup>CN (0.4 mmol), DME (1.0 mL), air, 140 °C, 12 h. <sup>[b]</sup> Isolated yield.

### 3. Crystal data and structure refinement of products

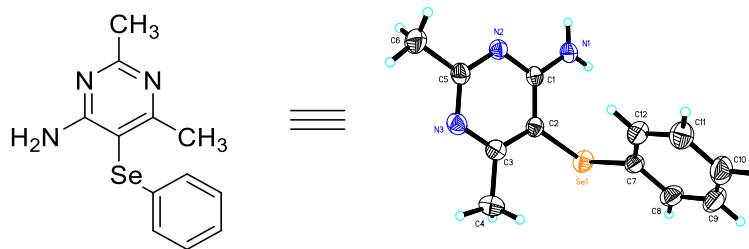

(16)

Single crystals of **16** were grown in trichloromethane and hexanes. Trichloromethane (4.0 mL) was added to **16** (20 mg in a 20 mL vial) followed by hexanes (8.0 mL). The 20 mL vial was not capped and placed at room temperature in the experimental cabinet for 3 days, whereupon crystals formed. A colorless diamond-shaped lumpy crystal of **16** was used for the X-ray crystallographic analysis. The crystal data of **16** have been deposited in CCDC with number mo\_dd22001\_0m and have been displayed at 50% ellipsoid contour probability level.

Table S2: Crystal data and structure refinement for mo\_dd22001\_0m.

| Crystal data and structure refinement for mo_dd22001_0m. |                                                   |
|----------------------------------------------------------|---------------------------------------------------|
| Identification code                                      | mo_dd22001_0m                                     |
| Empirical formula                                        | C <sub>12</sub> H <sub>13</sub> N <sub>3</sub> Se |
| Formula weight                                           | 278.21                                            |
| Temperature                                              | 293(2) K                                          |
| Wavelength                                               | 0.71073 Å                                         |
| Crystal system                                           | Triclinic                                         |

|                                   |                                                                                                                |
|-----------------------------------|----------------------------------------------------------------------------------------------------------------|
| Space group                       | P -1                                                                                                           |
| Unit cell dimensions              | a = 10.093(3) Å    a= 102.228(7)°.<br>b = 11.029(2) Å    b= 113.956(7)°.<br>c = 12.285(3) Å    g = 91.965(7)°. |
| Volume                            | 1210.3(5) Å <sup>3</sup>                                                                                       |
| Z                                 | 4                                                                                                              |
| Density (calculated)              | 1.527 Mg/m <sup>3</sup>                                                                                        |
| Absorption coefficient            | 3.079 mm <sup>-1</sup>                                                                                         |
| F(000)                            | 560                                                                                                            |
| Crystal size                      | 0.160 x 0.100 x 0.060 mm <sup>3</sup>                                                                          |
| Theta range for data collection   | 2.731 to 25.998°.                                                                                              |
| Index ranges                      | -12<=h<=12, -13<=k<=13, -<br>15<=l<=15                                                                         |
| Reflections collected             | 27602                                                                                                          |
| Independent reflections           | 4740 [R(int) = 0.0350]                                                                                         |
| Completeness to theta = 25.242°   | 99.5 %                                                                                                         |
| Absorption correction             | Semi-empirical from equivalents                                                                                |
| Max. and min. transmission        | 0.7456 and 0.5217                                                                                              |
| Refinement method                 | Full-matrix least-squares on F <sup>2</sup>                                                                    |
| Data / restraints / parameters    | 4740 / 0 / 309                                                                                                 |
| Goodness-of-fit on F <sup>2</sup> | 1.013                                                                                                          |

|                               |                                    |
|-------------------------------|------------------------------------|
| Final R indices [I>2sigma(I)] | R1 = 0.0267, wR2 = 0.0626          |
| R indices (all data)          | R1 = 0.0396, wR2 = 0.0693          |
| Extinction coefficient        | n/a                                |
| Largest diff. peak and hole   | 0.287 and -0.313 e.Å <sup>-3</sup> |

## 4. General Experimental Procedures and the Control Experiments

### (1) General procedure for the reactions of disulfides or diselenides with CH<sub>3</sub>CN

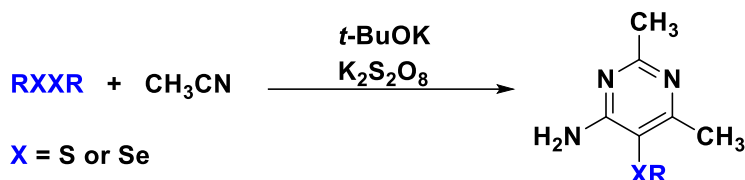

A 10 mL pressure tube equipped with a stir bar was charged with disulfides or diselenides (0.2 mmol), *t*-BuOK (2.0 equiv), K<sub>2</sub>S<sub>2</sub>O<sub>8</sub> (2.0 equiv), and CH<sub>3</sub>CN (28.7 mmol, 1.5 mL). The reaction mixture was stirred at 140°C under an air atmosphere for 24 h. After cooling the reaction to room temperature, the residue was purified by flash chromatography with neutral alumina to obtain the corresponding product.

### (2) General procedure for the reactions of 1,2-di-*p*-tolylidysulfane with mixed nitriles

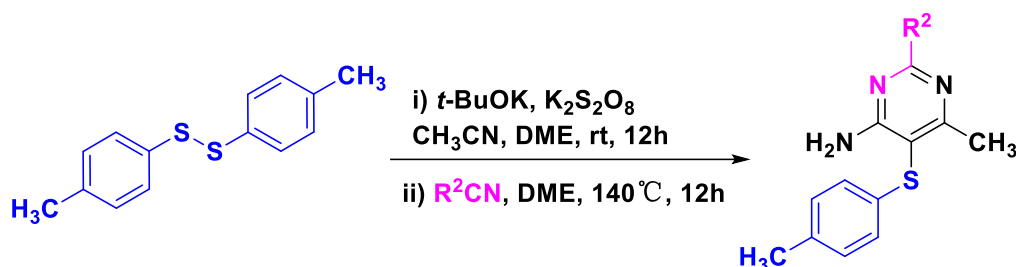

A 10 mL pressure tube equipped with a stir bar was charged with 1,2-di-*p*-tolylidysulfane (0.2 mmol), *t*-BuOK (2.0 equiv), K<sub>2</sub>S<sub>2</sub>O<sub>8</sub> (2.0 equiv), CH<sub>3</sub>CN (11.5 mmol, 0.6 mL) and DME (1.0 mL). The reaction mixture was stirred at room temperature under an air atmosphere for 12 h. Next, benzonitrile (0.4 mmol) and DME (1.0 mL) were added to the mixture, and the temperature was increased to 140 °C under an air atmosphere for 12 h. After cooling the reaction to room temperature, the residue was purified by flash chromatography with neutral alumina to obtain the corresponding product.

**(3) General procedure for the reaction of bis(4-methoxyphenyl) disulphide with three-component mixed nitriles.**

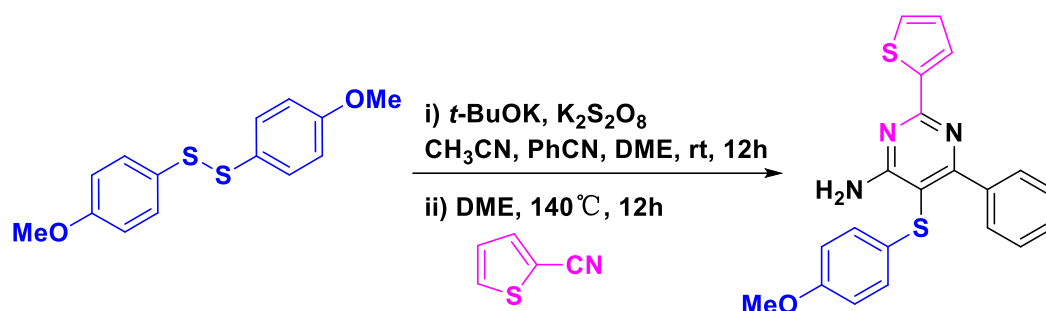

A 10 mL pressure tube equipped with a stir bar was charged with bis(4-methoxyphenyl) disulphide (0.2 mmol),  $t\text{-BuOK}$  (2.0 equiv),  $\text{K}_2\text{S}_2\text{O}_8$  (2.0 equiv),  $\text{CH}_3\text{CN}$  (11.5 mmol, 0.6 mL), benzonitrile (1.2 mL) and DME (0.5 mL). The reaction mixture was stirred at room temperature under an air atmosphere for 12 h. Next, 2-thiophenecarbonitrile (0.4 mmol) and DME (1.0 mL) were added to the mixture, and the temperature was then increased to  $140^\circ\text{C}$  under an air atmosphere for 12 h. After cooling the reaction to room temperature, the residue was purified by flash chromatography with neutral alumina to obtain the corresponding product.

**(4) General procedure for gram-scale synthesis.**

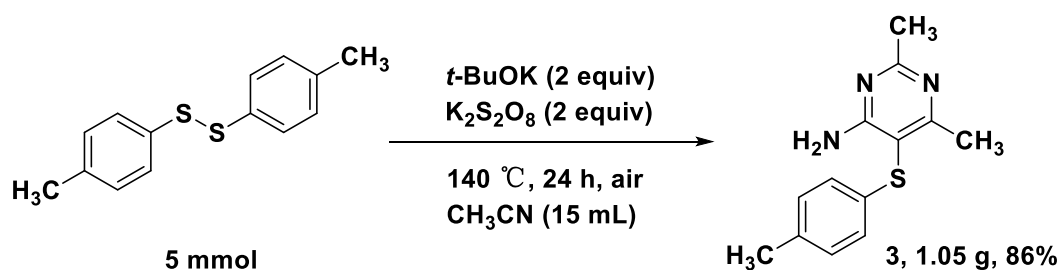

A 50 mL pressure tube equipped with a stir bar was charged with bis(4-methoxyphenyl) disulphide (5 mmol),  $t\text{-BuOK}$  (10 mmol, 2.0 equiv),  $\text{K}_2\text{S}_2\text{O}_8$  (10 mmol, 2.0 equiv), and  $\text{CH}_3\text{CN}$  (287 mmol, 15 mL). The reaction mixture was stirred at  $140^\circ\text{C}$  under an air atmosphere for 24 h. After cooling the reaction to room temperature, the residue was purified by flash chromatography with neutral alumina to obtain the corresponding product **3** (1.05 g, 86%).



**(5) General procedure for the reaction between 1,2-di-*p*-tolylidysulfane and 2,6-dimethylpyrimidin-4-amine**

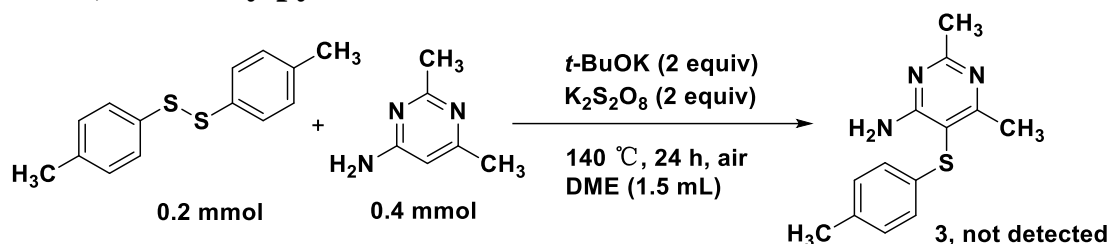

A 10 mL pressure tube equipped with a stir bar was charged with bis(4-methoxyphenyl) disulphide (0.2 mmol), 2,6-dimethylpyrimidin-4-amine (0.4 mmol), *t*-BuOK (0.4 mmol, 2.0 equiv), K<sub>2</sub>S<sub>2</sub>O<sub>8</sub> (0.4 mmol, 2.0 equiv), and DME (1.5 mL). The reaction mixture was stirred at 140 °C under an air atmosphere for 24 h. After cooling the reaction to room temperature, the residue was detected by GC-MS and no formation of the product **3** was observed.

**(6) General procedure for the control reaction of 1,2-di-*p*-tolylidysulfane at 140 °C or room temperature.**

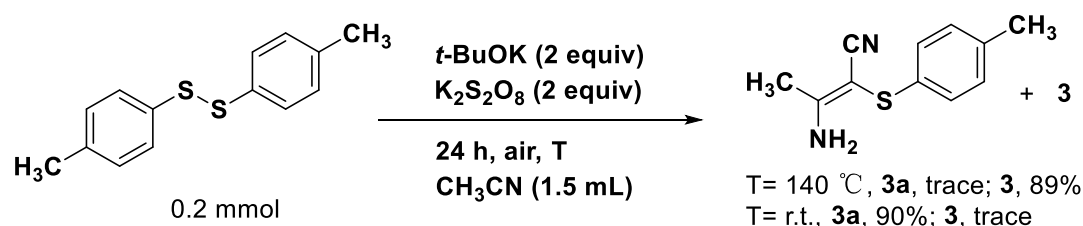

A 10 mL pressure tube equipped with a stir bar was charged with bis(4-methoxyphenyl) disulfide (0.2 mmol), *t*-BuOK (0.4 mmol, 2.0 equiv), K<sub>2</sub>S<sub>2</sub>O<sub>8</sub> (0.4 mmol, 2.0 equiv), and CH<sub>3</sub>CN (28.7 mmol, 1.5 mL). The reaction mixture was stirred at 140 °C under an air atmosphere for 24 h. After cooling the reaction to room temperature, the residue was purified by flash chromatography with neutral alumina to obtain the corresponding product **3** (43.6 mg, 89%). Meanwhile, the residue was detected by GC-MS and a trace of the product **3a** was detected. Alternatively, the reaction mixture was stirred at room temperature under an air atmosphere for 24 h. When the reaction was completed, the residue was purified by flash chromatography with neutral alumina to obtain the corresponding product

**3a** (36.7 mg, 90%). Meanwhile, the residue was detected by GC-MS and trace of the product **3** was detected.

**(7) General procedure for the control reaction of alkenyl sulfide 3a in CH<sub>3</sub>CN**

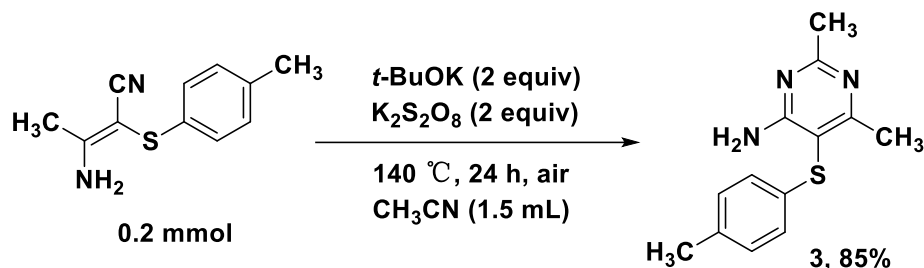

A 10 mL pressure tube equipped with a stir bar was charged with alkenyl sulfide **3a** (0.2 mmol), *t*-BuOK (0.4 mmol, 2.0 equiv), K<sub>2</sub>S<sub>2</sub>O<sub>8</sub> (0.4 mmol, 2.0 equiv), and CH<sub>3</sub>CN (28.7 mmol, 1.5 mL). The reaction mixture was stirred at 140 °C under an air atmosphere for 24 h. After cooling the reaction to room temperature, the residue was purified by flash chromatography with neutral alumina to obtain the corresponding product **3** (41.6 mg, 85%).

## 5. Characterization data for the products

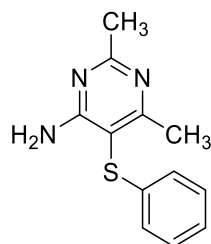

**2,6-dimethyl-5-(phenylthio)pyrimidin-4-amine (1):** yellow solid (42.1 mg, 91% yield), m.p. 113.3-114.3 °C.  $^1\text{H NMR}$  (400 MHz,  $\text{CDCl}_3$ )  $\delta$  (ppm) 7.19 (d,  $J= 4.8$  Hz, 2H), 7.17-7.01 (m, 1H), 6.99 (d,  $J= 5.2$  Hz, 2H), 6.25 (br, 2H), 2.45 (s, 3H), 2.42 (s, 3H).  $^{13}\text{C NMR}$  (100 MHz,  $\text{CDCl}_3$ )  $\delta$  (ppm) 171.1, 167.5, 164.5, 134.6, 129.3, 125.9, 125.9, 103.0, 25.6, 23.1.

HR-MS (ESI)  $m/z$ : Calculated for  $\text{C}_{12}\text{H}_{14}\text{N}_3\text{S}^+$   $[\text{M} + \text{H}]^+$ : 232.0903. Found: 232.0901.

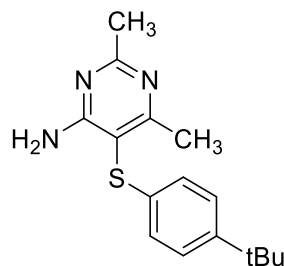

**5-((4-(tert-butyl)phenyl)thio)-2,6-dimethylpyrimidin-4-amine (2):** yellow solid (49.9 mg, 87% yield), m.p. 137.4-138.7 °C.  $^1\text{H NMR}$  (400 MHz,  $\text{CDCl}_3$ )  $\delta$  (ppm) 7.30 (d,  $J= 6.4$  Hz, 2H), 7.03 (d,  $J= 6.4$  Hz, 2H), 6.05 (br, 2H), 2.55 (s, 3H), 2.52 (s, 3H), 1.31 (s, 9H);  $^{13}\text{C NMR}$  (100 MHz,  $\text{CDCl}_3$ )  $\delta$  (ppm) 170.9, 167.4, 164.4, 149.2, 131.0, 126.4, 126.0, 103.6, 34.4, 31.3, 25.7, 23.1.

HR-MS (ESI)  $m/z$ : Calculated for  $\text{C}_{16}\text{H}_{22}\text{N}_3\text{S}^+$   $[\text{M} + \text{H}]^+$ : 288.1529. Found:

288.1524.

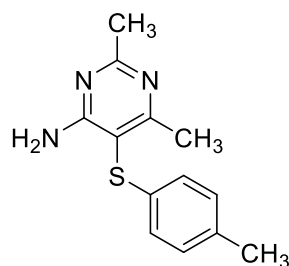

**2,6-dimethyl-5-(p-tolylthio)pyrimidin-4-amine (3):** yellow solid (43.6 mg, 89% yield), m.p. 131.9-132.8 °C. **<sup>1</sup>H NMR** (400 MHz, CDCl<sub>3</sub>) δ (ppm) 7.02 (d, *J*= 8.0 Hz, 2H), 6.92 (d, *J*= 8.0 Hz, 2H), 6.08 (br, 2H), 2.47 (s, 3H), 2.44 (s, 3H), 2.25 (s, 3H); **<sup>13</sup>C NMR** (100 MHz, CDCl<sub>3</sub>) δ (ppm) 170.8, 167.5, 164.2, 136.0, 130.9, 130.1, 126.4, 103.7, 25.8, 23.1, 20.9.

HR-MS (ESI) *m/z*: Calculated for C<sub>13</sub>H<sub>16</sub>N<sub>3</sub>S<sup>+</sup> [M + H]<sup>+</sup>: 246.1059. Found: 246.1054.

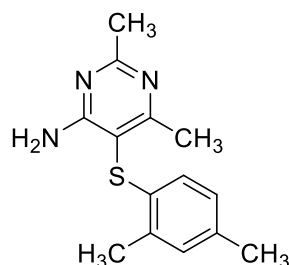

**5-((2,4-dimethylphenyl)thio)-2,6-dimethylpyrimidin-4-amine (4):** yellow solid (45.0 mg, 87% yield), m.p. 148.4-149.3°C. **<sup>1</sup>H NMR** (400 MHz, CDCl<sub>3</sub>) δ (ppm) 6.98 (s, 1H), 6.82 (d, *J*= 6.0 Hz, 1H), 6.52 (d, *J*= 8.0 Hz, 1H), 5.86 (br, 2H), 2.48 (s, 3H), 2.45 (s, 3H), 2.37 (s, 3H), 2.24 (s, 3H); **<sup>13</sup>C NMR** (125 MHz, CDCl<sub>3</sub>) δ (ppm) 171.0, 167.3, 164.4, 135.4, 135.2, 131.5, 129.9, 127.6, 124.3, 102.9, 25.6, 23.0, 20.7, 19.8.

HR-MS (ESI) *m/z*: Calculated for C<sub>14</sub>H<sub>18</sub>N<sub>3</sub>S<sup>+</sup>[M + H]<sup>+</sup>: 260.1216. Found:

260.1210.

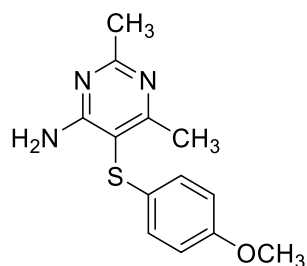

**5-((4-methoxyphenyl)thio)-2,6-dimethylpyrimidin-4-amine (5)**: yellow solid (49.1 mg, 94% yield), m.p. 125.0-125.8 °C. **<sup>1</sup>H NMR** (400 MHz, CDCl<sub>3</sub>) δ 7.02 (d, *J* = 8.8 Hz, 2H), 6.77 (d, *J* = 8.8 Hz, 2H), 5.99 (br, 2H), 3.72 (s, 3H), 2.48 (s, 3H), 2.44 (s, 3H); **<sup>13</sup>C NMR** (100 MHz, CDCl<sub>3</sub>) δ 170.4, 167.2, 164.2, 158.5, 128.7, 125.1, 115.1, 104.8, 55.4, 25.7, 23.1.

HRMS (ESI) *m/z*: [M + H]<sup>+</sup> Calculated for C<sub>13</sub>H<sub>16</sub>N<sub>3</sub>OS<sup>+</sup>: 262.1009; Found:

261.1013.

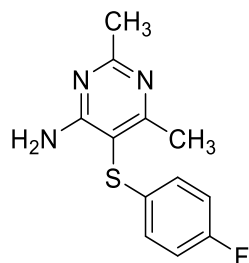

**5-((4-fluorophenyl)thio)-2,6-dimethylpyrimidin-4-amine (6)**: yellow solid (40.8 mg, 82% yield), m.p. 114.1-116.0 °C. **<sup>1</sup>H NMR** (400 MHz, CDCl<sub>3</sub>) δ (ppm) 7.01-6.97 (m, 2H), 6.93-6.88 (m, 2H), 6.05 (br, 2H), 2.50 (s, 3H), 2.48 (s, 3H). **<sup>13</sup>C NMR** (100 MHz, CDCl<sub>3</sub>) δ (ppm) 171.0, 167.7, 164.4, 161.5 (d, *J* = 244.6 Hz), 129.8 (d, *J* = 3.1 Hz), 128.2 (d, *J* = 7.8 Hz), 116.6 (d, *J* = 22.1 Hz), 103.7, 25.7, 23.1. **<sup>19</sup>F NMR** (471 MHz, CDCl<sub>3</sub>) δ (ppm) 116.1.

HR-MS (ESI)  $m/z$ : Calculated for  $C_{12}H_{13}FN_3S^+$   $[M + H]^+$ : 250.0809. Found: 250.0812.

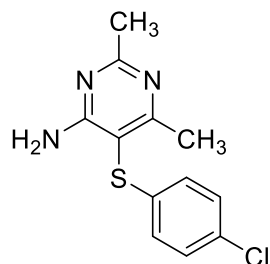

**5-((4-chlorophenyl)thio)-2,6-dimethylpyrimidin-4-amine (7)**: yellow solid (44.5 mg, 84% yield), m.p. 156.9-157.6 °C.  $^1H$  NMR (400 MHz,  $CDCl_3$ )  $\delta$  (ppm) 7.21 (d,  $J$ = 6.8 Hz, 2H), 6.96 (d,  $J$ = 6.8 Hz, 2H), 5.66 (br, 2H), 2.50 (s, 3H), 2.48 (s, 3H);  $^{13}C$  NMR (100 MHz,  $CDCl_3$ )  $\delta$  (ppm) 174.3, 168.4, 161.7, 137.3, 131.9, 129.5, 125.1, 104.1, 26.7, 20.5.

HR-MS (ESI)  $m/z$ : Calculated for  $C_{12}H_{13}N_3ClS^+$   $[M + H]^+$ : 266.0513. Found: 266.0509.

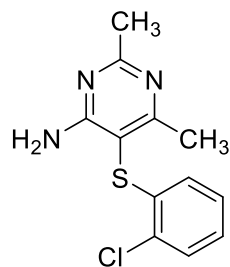

**5-((2-chlorophenyl)thio)-2,6-dimethylpyrimidin-4-amine (8)**: yellow solid (47.7 mg, 90% yield), m.p. 169.8-170.4 °C.  $^1H$  NMR (400 MHz,  $CDCl_3$ )  $\delta$  (ppm) 7.37-7.34 (dd,  $J_1$ = 4.0 Hz,  $J_2$ = 6.4 Hz, 1H), 7.10 (d,  $J$ = 3.2 Hz, 1H), 7.08 (d,  $J$ = 4.0 Hz, 1H), 6.62-6.60 (dd,  $J_1$ = 3.2 Hz,  $J_2$ = 5.6 Hz, 1H), 5.76 (br, 2H), 2.51 (s, 3H), 2.48 (s, 3H);  $^{13}C$  NMR (100 MHz,  $CDCl_3$ )  $\delta$  (ppm) 171.7, 168.1, 164.9, 133.6, 131.6, 130.0, 127.5, 126.7,

125.3, 102.2, 25.7, 23.0.

HR-MS (ESI)  $m/z$ : Calculated for  $C_{12}H_{13}N_3ClS^+[M + H]^+$ : 266.0513.

Found: 266.0516.

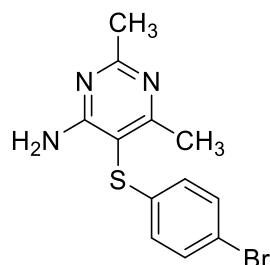

**5-((4-bromophenyl)thio)-2,6-dimethylpyrimidin-4-amine (9)**: yellow solid (53.1 mg, 86% yield), m.p. 153.6-154.2 °C.  $^1H$  NMR (400 MHz,  $CDCl_3$ )  $\delta$  (ppm) 7.31 (d,  $J= 8.4$  Hz, 2H), 6.56 (d,  $J= 8.4$  Hz, 2H), 6.12 (br, 2H), 2.45 (s, 6H);  $^{13}C$  NMR (100 MHz,  $CDCl_3$ )  $\delta$  (ppm) 171.2, 167.8, 164.4, 133.9, 132.4, 127.4, 119.6, 102.5, 25.7, 23.1.

HR-MS (ESI)  $m/z$ : Calculated for  $C_{12}H_{13}N_3BrS^+[M + H]^+$ : 310.0008.

Found: 310.0012.

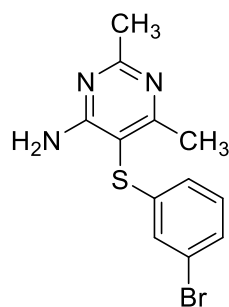

**5-((3-bromophenyl)thio)-2,6-dimethylpyrimidin-4-amine (10)**: yellow solid (51.3mg, 83% yield), m.p. 146.3-147.4 °C.  $^1H$  NMR (400 MHz,  $CDCl_3$ )  $\delta$  (ppm) 7.23 (d,  $J= 8.0$  Hz, 1H), 7.13 (s, 1H), 7.08-7.04 (m, 1H), 6.91 (d,  $J= 8.0$  Hz, 1H), 5.98 (br, 2H), 2.46 (s, 3H), 2.45 (s, 3H);  $^{13}C$  NMR (125 MHz,  $CDCl_3$ )  $\delta$  (ppm) 171.3, 168.2, 164.2, 137.0, 130.6, 129.1, 128.4,

124.3, 123.4, 102.1, 25.8, 23.1.

HR-MS (ESI)  $m/z$ : Calculated for  $C_{12}H_{13}N_3BrS^+[M + H]^+$ : 310.0008.

Found: 310.0006.

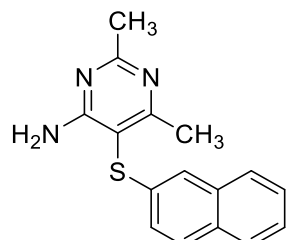

**2,6-dimethyl-5-(naphthalen-2-ylthio)pyrimidin-4-amine (11)**: yellow solid (24.7 mg, 44% yield), m.p. 160.1-161.4 °C.  $^1H$  NMR (400 MHz,  $CDCl_3$ )  $\delta$  (ppm) 7.75 (d,  $J= 8.0$  Hz, 1H), 7.72 (d,  $J= 8.8$  Hz, 1H), 7.64 (d,  $J= 8.0$  Hz, 1H), 7.46-7.40 (m, 2H), 7.39 (s, 1H), 7.18 (d,  $J= 8.4$  Hz, 1H), 5.81 (br, 2H), 2.52 (s, 6H);  $^{13}C$  NMR (100 MHz,  $CDCl_3$ )  $\delta$  (ppm) 172.1, 167.8, 164.4, 133.8, 131.9, 131.7, 129.2, 127.8, 127.0, 126.9, 125.8, 124.44, 123.7, 103.0, 27.1, 23.1.

HR-MS (ESI)  $m/z$ : Calculated for  $C_{16}H_{16}N_3S^+[M + H]^+$ : 282.1059. Found: 282.1061.

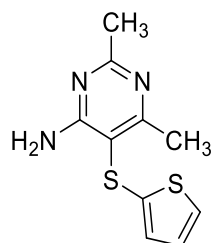

**2,6-dimethyl-5-(thiophen-2-ylthio)pyrimidin-4-amine (12)**: yellow solid (41.8 mg, 89% yield), m.p. 143.0-144.0 °C.  $^1H$  NMR (400 MHz,  $CDCl_3$ )  $\delta$  (ppm) 7.22 (d,  $J= 5.2$  Hz, 1H), 7.53 (d,  $J= 3.6$  Hz, 1H), 6.91-6.88



(dd,  $J_1 = 3.2$  Hz,  $J_2 = 3.6$  Hz, 1H), 6.08 (br, 2H), 2.60 (s, 3H), 2.42 (s, 3H);

$^{13}\text{C}$  NMR (100 MHz,  $\text{CDCl}_3$ )  $\delta$  (ppm) 169.8, 167.3, 163.7, 133.8, 130.8, 128.2, 127.5, 106.1, 25.6, 23.2.

HR-MS (ESI)  $m/z$ : Calculated for  $\text{C}_{10}\text{H}_{12}\text{N}_3\text{S}_2^+[\text{M} + \text{H}]^+$ : 238.0467. Found: 238.0464.

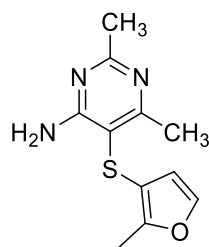

**2,6-dimethyl-5-((2-methylfuran-3-yl)thio)pyrimidin-4-amine (13):**

yellow solid (44.2 mg, 94% yield), m.p. 142.6-143.2 °C.  $^1\text{H}$  NMR (400 MHz,  $\text{CDCl}_3$ )  $\delta$  (ppm) 7.20 (d,  $J = 2.0$  Hz, 1H), 6.13 (d,  $J = 2.0$  Hz, 1H), 5.84 (br, 2H), 2.52 (s, 3H), 2.42 (s, 3H), 2.34 (s, 3H);  $^{13}\text{C}$  NMR (100 MHz,  $\text{CDCl}_3$ )  $\delta$  (ppm) 169.5, 166.8, 164.0, 152.5, 141.4, 113.2, 109.6, 106.1, 25.7, 23.3, 12.2.

HR-MS (ESI)  $m/z$ : Calculated for  $\text{C}_{11}\text{H}_{14}\text{N}_3\text{OS}^+[\text{M} + \text{H}]^+$ : 236.0852. Found: 236.0858.

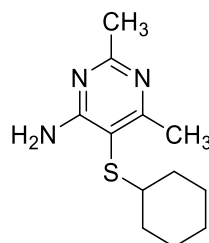

**5-(cyclohexylselanyl)-2,6-dimethylpyrimidin-4-amine (14):** yellow solid (25.1mg, 53% yield), m.p. 151.5-152.4 °C.  $^1\text{H}$  NMR (400 MHz,

CDCl<sub>3</sub>)  $\delta$  (ppm) 5.79 (br, 2H), 2.86-2.81 (m, 1H), 2.55 (s, 3H), 2.44 (s, 3H), 1.87-1.85 (m, 2H), 1.75-1.71 (m, 2H), 1.39-1.32 (m, 4H), 1.29-1.17 (m, 2H); <sup>13</sup>C NMR (100 MHz, CDCl<sub>3</sub>)  $\delta$  (ppm) 170.2, 166.3, 164.9, 105.2, 47.1, 32.9, 26.1, 25.6, 23.3, 23.2.

HR-MS (ESI) m/z: Calculated for C<sub>12</sub>H<sub>20</sub>N<sub>3</sub>S<sup>+</sup>[M + H]<sup>+</sup>: 238.1372. Found: 238.1375.

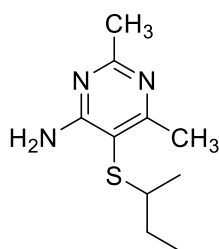

**5-(*sec*-butylthio)-2,6-dimethylpyrimidin-4-amine (15):** yellow solid (24.9 mg, 59% yield), m.p.118.4-119.1 °C. <sup>1</sup>H NMR (400 MHz, CDCl<sub>3</sub>)  $\delta$  (ppm) 6.17 (br, 2H), 2.91-2.83 (m, 1H), 2.49 (s, 3H), 2.38 (s, 3H), 1.60-1.42 (m, 2H), 1.14 (d, *J*= 6.4 Hz, 3H), 0.93 (d, *J*= 7.6 Hz, 3H); <sup>13</sup>C NMR (100 MHz, CDCl<sub>3</sub>)  $\delta$  (ppm) 170.1, 166.1, 164.9, 105.5, 45.2, 29.7, 25.4, 23.2, 20.4, 11.4.

HR-MS (ESI) m/z: Calculated for C<sub>10</sub>H<sub>18</sub>N<sub>3</sub>S<sup>+</sup>[M + H]<sup>+</sup>: 212.1216. Found: 212.1211.

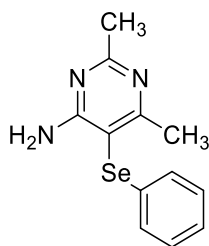

**2,6-dimethyl-5-(phenylselanyl)pyrimidin-4-amine (16):** yellow solid

(53.0 mg, 95% yield), m.p. 128.7-129.4 °C.  $^1\text{H NMR}$  (400 MHz,  $\text{CDCl}_3$ )  $\delta$  (ppm) 7.25-7.17 (m, 5H), 5.78 (br, 2H), 2.56 (s, 3H), 2.48 (s, 3H);  $^{13}\text{C NMR}$  (125 MHz,  $\text{CDCl}_3$ )  $\delta$  (ppm) 170.6, 167.7, 164.2, 129.8, 129.6, 128.9, 126.7, 101.8, 25.5, 25.1.

HR-MS (ESI)  $m/z$ : Calculated for  $\text{C}_{12}\text{H}_{14}\text{N}_3\text{Se}^+[\text{M} + \text{H}]^+$ : 280.0347. Found: 280.0345.

Structure of **16** was clearly determined by X-ray crystallographic analysis of its single crystal.

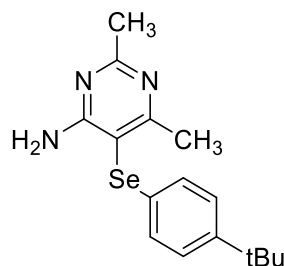

**5-((4-(tert-butyl)phenyl)selanyl)-2,6-dimethylpyrimidin-4-amine (17)**: yellow solid (61.6 mg, 92% yield), m.p. 128.1-128.6 °C.  $^1\text{H NMR}$  (400 MHz,  $\text{CDCl}_3$ )  $\delta$  (ppm) 7.27 (d,  $J = 8.0$  Hz, 2H), 7.15 (d,  $J = 7.6$  Hz, 2H), 5.60 (br, 2H), 2.60 (s, 3H), 2.51 (s, 3H), 1.29 (s, 9H);  $^{13}\text{C NMR}$  (100 MHz,  $\text{CDCl}_3$ )  $\delta$  (ppm) 170.7, 167.7, 164.2, 150.1, 129.0, 126.8, 126.2, 102.2, 34.5, 31.3, 25.7, 25.3.

HR-MS (ESI)  $m/z$ : Calculated for  $\text{C}_{16}\text{H}_{22}\text{N}_3\text{Se}^+[\text{M} + \text{H}]^+$ : 336.0973. Found: 336.0975.

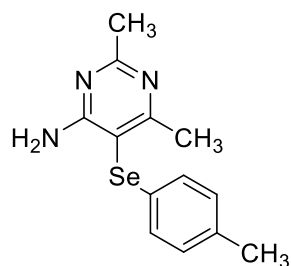

**2,6-dimethyl-5-(p-tolylselanyl)pyrimidin-4-amine (18):** yellow solid (54.5mg, 93% yield), m.p. 139.5-140.3 °C.  $^1\text{H NMR}$  (400 MHz,  $\text{CDCl}_3$ )  $\delta$  (ppm) 7.08 (d,  $J= 8.0$  Hz, 2H), 7.01 (d,  $J= 8.0$  Hz, 2H), 5.91 (br, 2H), 2.54 (s, 3H), 2.45 (s, 3H), 2.26 (s, 3H);  $^{13}\text{C NMR}$  (100 MHz,  $\text{CDCl}_3$ )  $\delta$  (ppm) 170.5, 167.6, 164.3, 136.8, 130.4, 129.4, 126.0, 102.4, 25.6, 25.2, 21.0. HR-MS (ESI)  $m/z$ : Calculated for  $\text{C}_{13}\text{H}_{16}\text{N}_3\text{S}^+[\text{M} + \text{H}]^+$ : 294.0504. Found: 294.0502.

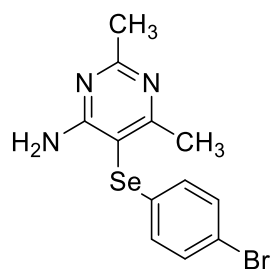

**5-((4-bromophenyl)selanyl)-2,6-dimethylpyrimidin-4-amine (19):** yellow solid (61.4 mg, 86% yield), m.p. 156.6-157.5 °C.  $^1\text{H NMR}$  (400 MHz,  $\text{CDCl}_3$ )  $\delta$  (ppm) 7.30 (d,  $J= 8.0$  Hz, 2H), 6.41 (d,  $J= 8.4$  Hz, 2H), 5.63 (br, 2H), 2.55 (s, 3H), 2.49 (s, 3H);  $^{13}\text{C NMR}$  (100 MHz,  $\text{CDCl}_3$ )  $\delta$  (ppm) 170.8, 168.2, 164.1, 132.7, 130.5, 128.9, 120.8, 101.5, 25.7, 25.2. HR-MS (ESI)  $m/z$ : Calculated for  $\text{C}_{12}\text{H}_{13}\text{BrN}_3\text{Se}^+[\text{M} + \text{H}]^+$ : 357.9453. Found: 357.9456.

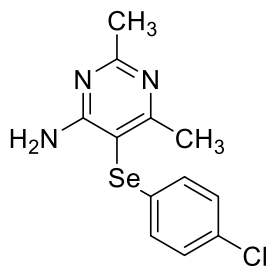

**5-((4-chlorophenyl)selanyl)-2,6-dimethylpyrimidin-4-amine (20):**

yellow solid (55.1 mg, 88% yield), m.p. 157.9-158.8 °C. **<sup>1</sup>H NMR** (400 MHz, CDCl<sub>3</sub>) δ (ppm) 7.13 (d, *J* = 8.0 Hz, 2H), 7.06 (d, *J* = 8.0 Hz, 2H), 6.06 (br, 2H), 2.50 (s, 3H), 2.42 (s, 3H); **<sup>13</sup>C NMR** (100 MHz, CDCl<sub>3</sub>) δ (ppm) 170.8, 167.9, 164.3, 132.8, 130.2, 129.7, 128.2, 101.7, 25.5, 25.2.

HR-MS (ESI) *m/z*: Calculated for C<sub>12</sub>H<sub>13</sub>ClN<sub>3</sub>Se<sup>+</sup>[M + H]<sup>+</sup>: 313.9958.

Found: 313.9963.

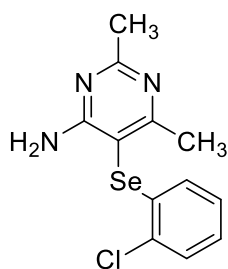

**5-((2-chlorophenyl)selanyl)-2,6-dimethylpyrimidin-4-amine (21):**

yellow solid (53.8 mg, 86% yield), m.p. 167.8-168.2 °C. **<sup>1</sup>H NMR** (400 MHz, CDCl<sub>3</sub>) δ (ppm) 7.34 (d, *J* = 8.0 Hz, 1H), 7.14-7.11 (dd, *J*<sub>1</sub> = 6.0 Hz, *J*<sub>2</sub> = 7.6 Hz, 1H), 7.07-7.04 (dd, *J*<sub>1</sub> = 6.0 Hz, *J*<sub>2</sub> = 7.6 Hz, 1H), 6.70 (d, *J* = 7.6 Hz, 1H), 5.74 (br, 2H), 2.54 (s, 3H), 2.50 (s, 3H); **<sup>13</sup>C NMR** (100 MHz, CDCl<sub>3</sub>) δ (ppm) 171.7, 168.5, 164.6, 133.3, 130.2, 129.9, 127.8, 127.8, 127.5, 100.4, 25.7, 25.1.

HR-MS (ESI) *m/z*: Calculated for C<sub>12</sub>H<sub>13</sub>ClN<sub>3</sub>Se<sup>+</sup>[M + H]<sup>+</sup>: 313.9958.

Found: 313.9956.

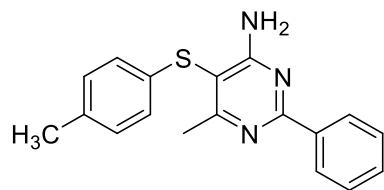

**6-methyl-2-phenyl-5-(*p*-tolylthio)pyrimidin-4-amine (22):** yellow solid (55.3 mg, 90% yield), m.p. 131.2-131.7 °C. **<sup>1</sup>H NMR** (400 MHz, CDCl<sub>3</sub>) δ (ppm) 8.43 (d, *J*= 5.2 Hz, 2H), 7.48-7.47(m, 3H), 7.08 (d, *J*= 8.0 Hz, 2H), 7.04 (d, *J*= 8.4 Hz, 2H), 5.86 (br, 2H), 2.66 (s, 3H), 2.31 (s, 3H); **<sup>13</sup>C NMR** (100 MHz, CDCl<sub>3</sub>) δ (ppm) 171.2, 164.6, 163.7, 137.7, 136.0, 131.2, 130.7, 130.2, 128.5, 128.5, 126.6, 104.7, 23.6, 21.1.

HR-MS (ESI) *m/z*: Calculated for C<sub>18</sub>H<sub>18</sub>N<sub>3</sub>S<sup>+</sup>[M + H]<sup>+</sup>: 308.1216. Found: 308.1217.

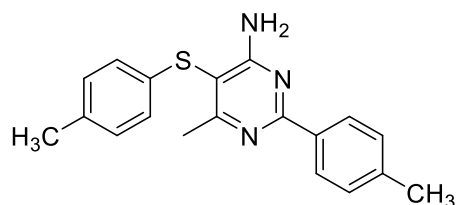

**6-methyl-2-(*p*-tolyl)-5-(*p*-tolylthio)pyrimidin-4-amine (23):** yellow solid (45.6 mg, 71% yield), m.p. 130.0-130.6 °C. **<sup>1</sup>H NMR** (400 MHz, CDCl<sub>3</sub>) δ (ppm) 8.32 (d, *J*= 8.0 Hz, 2H), 7.29 (d, *J*= 8.0 Hz, 2H), 7.10 (d, *J*= 8.4 Hz, 2H), 7.04 (d, *J*= 8.4 Hz, 2H), 5.66 (br, 2H), 2.65 (s, 3H), 2.45 (s, 3H), 2.33 (s, 3H); **<sup>13</sup>C NMR** (100 MHz, CDCl<sub>3</sub>) δ (ppm) 171.2, 164.5, 163.7, 140.9, 135.9, 134.9, 131.2, 130.2, 129.2, 128.3, 126.4, 104.2, 23.5, 21.6, 21.0.

HR-MS (ESI) *m/z*: Calculated for C<sub>19</sub>H<sub>20</sub>N<sub>3</sub>S<sup>+</sup>[M + H]<sup>+</sup>: 322.1372. Found:

322.1374.

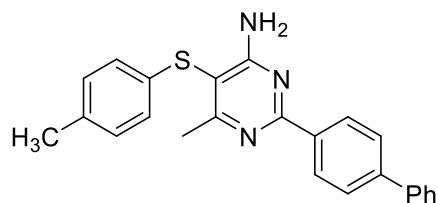

**2-([1,1'-biphenyl]-4-yl)-6-methyl-5-(*p*-tolylthio)pyrimidin-4-amine**

(**24**): white solid (49.0 mg, 64% yield), m.p. 153.5-154.2 °C. <sup>1</sup>H NMR (400 MHz, CDCl<sub>3</sub>) δ (ppm) 8.46 (d, *J*= 8.8 Hz, 2H), 7.70 (d, *J*= 8.0 Hz, 2H), 7.68 (t, *J*= 7.2 Hz, 2H), 7.47 (t, *J*= 8.0 Hz, 2H), 7.37 (t, *J*= 8.0 Hz, 1H), 7.07 (d, *J*= 8.0 Hz, 2H), 7.02 (d, *J*= 8.0 Hz, 2H), 5.59 (br, 2H), 2.64 (s, 3H), 2.30 (s, 3H); <sup>13</sup>C NMR (100 MHz, CDCl<sub>3</sub>) δ (ppm) 171.2, 164.4, 163.4, 143.3, 140.7, 136.6, 136.0, 131.1, 130.2, 128.9, 128.8, 127.7, 127.2, 127.1, 126.5, 23.5, 21.0.

HR-MS (ESI) *m/z*: Calculated for C<sub>24</sub>H<sub>22</sub>N<sub>3</sub>S<sup>+</sup>[M + H]<sup>+</sup>: 384.1529. Found: 384.1532.

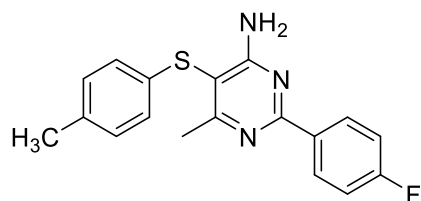

**2-(4-fluorophenyl)-6-methyl-5-(*p*-tolylthio)pyrimidin-4-amine** (**25**):

yellow solid (23.4 mg, 36% yield), m.p. 146.2-147.4 °C. <sup>1</sup>H NMR (400 MHz, CDCl<sub>3</sub>) δ (ppm) 8.41-8.38 (m, 2H), 7.14-7.10 (m, 2H), 7.06 (d, *J*= 8.4 Hz, 2H), 7.00 (d, *J*= 8.0 Hz, 2H), 5.58 (br, 2H), 2.60 (s, 3H), 2.29 (s, 3H); <sup>13</sup>C NMR (100 MHz, CDCl<sub>3</sub>) δ (ppm) 171.2, 164.7 (d, *J*=248.8 Hz), 164.4, 162.7, 136.1, 133.8 (d, *J*=3.0Hz), 133.2, 131.0, 130.5 (d, *J*= 8.6 Hz),

130.2, 126.5, 120.1, 115.3 (d,  $J = 21.4$  Hz), 104.6, 23.5, 21.0.  $^{19}\text{F}$  NMR (471 MHz,  $\text{CDCl}_3$ )  $\delta$  (ppm) 62.6.

HR-MS (ESI)  $m/z$ : Calculated for  $\text{C}_{18}\text{H}_{17}\text{FN}_3\text{S}^+[\text{M} + \text{H}]^+$ : 326.1122. Found: 326.1125.

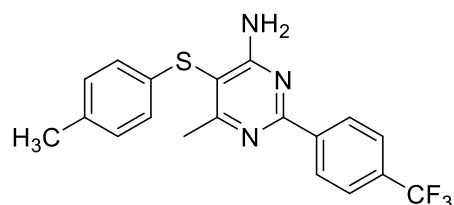

**6-methyl-5-(*p*-tolylthio)-2-(4-(trifluoromethyl)phenyl)pyrimidin-4-**

**amine (26):** yellow solid (45.0 mg, 60% yield), m.p. 145.9-146.5 °C.  $^1\text{H}$  NMR (400 MHz,  $\text{CDCl}_3$ )  $\delta$  (ppm) 8.50 (d,  $J = 8.4$  Hz, 2H), 7.70 (d,  $J = 8.4$  Hz, 2H), 7.08 (d,  $J = 8.4$  Hz, 2H), 7.02 (d,  $J = 8.4$  Hz, 2H), 5.66 (br, 2H), 2.63 (s, 3H), 2.30 (s, 3H);  $^{13}\text{C}$  NMR (100 MHz,  $\text{CDCl}_3$ )  $\delta$  (ppm) 171.3, 164.4, 162.2, 141.0, 139.7, 136.3, 132.1 (d,  $J = 32.0$  Hz) 130.7, 130.2, 127.6 (q,  $J = 274.5$  Hz), 125.3 (q,  $J = 37.7$  Hz), 122.9, 105.7, 23.5, 21.0.  $^{19}\text{F}$  NMR (471 MHz,  $\text{CDCl}_3$ )  $\delta$  (ppm) 110.5.

HR-MS (ESI)  $m/z$ : Calculated for  $\text{C}_{19}\text{H}_{17}\text{F}_3\text{N}_3\text{S}^+[\text{M} + \text{H}]^+$ : 376.1090.

Found: 376.1091.

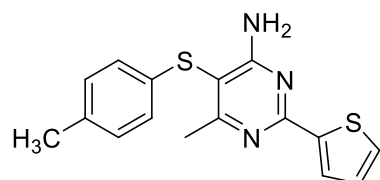

**6-methyl-2-(thiophen-2-yl)-5-(*p*-tolylthio)pyrimidin-4-amine (27):**

yellow solid (55.1 mg, 88% yield), m.p. 138.5- 138.8 °C.  $^1\text{H}$  NMR (400 MHz,  $\text{CDCl}_3$ )  $\delta$  (ppm) 7.94 (d,  $J = 0.4$  Hz, 1H), 7.12-7.10 (dd,  $J_1 = 4.0$  Hz,



$J= 5.2$  Hz, 1H), 7.06 (d,  $J= 8.0$  Hz, 2H), 6.99 (d,  $J= 8.4$  Hz, 2H), 5.66 (br, 2H), 2.57 (s, 3H), 2.29 (s, 3H);  $^{13}\text{C}$  NMR (125 MHz,  $\text{CDCl}_3$ )  $\delta$  (ppm) 171.3, 164.2, 160.2, 143.4, 136.0, 131.1, 130.1, 129.8, 129.1, 128.1, 126.4, 104.0, 23.3, 21.0.

HR-MS (ESI)  $m/z$ : Calculated for  $\text{C}_{16}\text{H}_{16}\text{N}_3\text{S}_2^+[\text{M} + \text{H}]^+$ : 314.0780. Found: 314.0783.

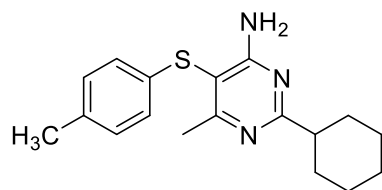

**2-cyclohexyl-6-methyl-5-(*p*-tolylthio)pyrimidin-4-amine (28)** : white solid (21.3 mg, 34% yield), m.p. 133.6-134.4 °C.  $^1\text{H}$  NMR (400 MHz,  $\text{CDCl}_3$ )  $\delta$  (ppm) 7.06 (d,  $J= 7.6$  Hz, 2H), 6.96 (d,  $J= 8.4$  Hz, 2H), 5.48 (br, 2H), 2.64 (t,  $J= 12.0$  Hz, 1H), 2.52 (s, 3H), 2.29 (s, 3H), 1.95 (d,  $J= 12.4$  Hz, 2H), 1.83 (d,  $J= 12.0$  Hz, 2H), 1.62-1.53(m, 2H), 1.42-1.25(m, 4H);  $^{13}\text{C}$  NMR (125 MHz,  $\text{CDCl}_3$ )  $\delta$  (ppm) 174.0, 170.6, 164.3, 136.0, 131.1, 130.1, 126.5, 103.7, 47.3, 32.0, 26.2, 26.0, 23.1, 21.0.

HR-MS (ESI)  $m/z$ : Calculated for  $\text{C}_{18}\text{H}_{24}\text{N}_3\text{S}^+[\text{M} + \text{H}]^+$ : 314.1685. Found: 314.1683.

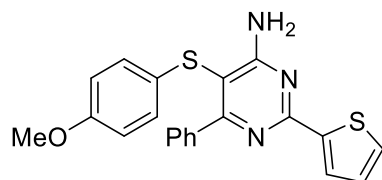

**5-((4-methoxyphenyl)thio)-6-phenyl-2-(thiophen-2-yl)pyrimidin-4-amine (29)** : white solid (34 mg, 43% yield), m.p. 210.0-210.2 °C.  $^1\text{H}$  NMR

(400 MHz, CDCl<sub>3</sub>)  $\delta$  (ppm) 8.01 (d,  $J$ = 2.4 Hz, 1H), 7.71 (d,  $J$ = 5.6 Hz, 2H), 7.45 (d,  $J$ = 3.6 Hz, 1H), 7.43-7.38 (m, 3H), 7.13-7.11 (dd,  $J_1$ = 4.0 Hz,  $J_2$ = 5.2 Hz, 1H), 7.01 (d,  $J$ = 8.8 Hz, 2H), 6.77 (d,  $J$ = 8.8 Hz, 2H), 5.70 (br, 2H), 3.75 (s, 3H); <sup>13</sup>C NMR (100 MHz, CDCl<sub>3</sub>)  $\delta$  (ppm) 169.7, 164.7, 160.2, 158.6, 143.3, 138.5, 130.0, 129.5, 129.5, 129.4, 128.7, 128.1, 127.8, 125.6, 115.1, 104.2, 55.4.

HR-MS (ESI)  $m/z$ : Calculated for C<sub>16</sub>H<sub>16</sub>N<sub>3</sub>S<sub>2</sub><sup>+</sup>[M + H]<sup>+</sup>: 391.0813. Found: 391.0817.

## 6. $^1\text{H}$ NMR, $^{13}\text{C}$ NMR and $^{19}\text{F}$ NMR spectra

### Compound (1)

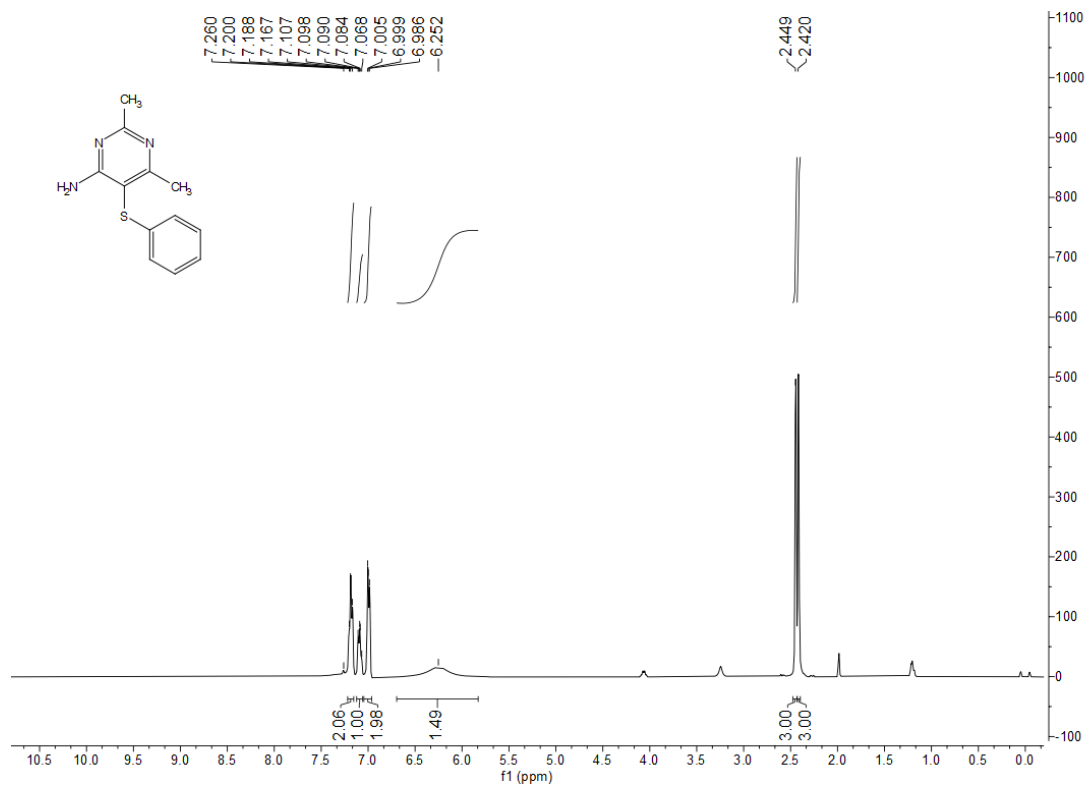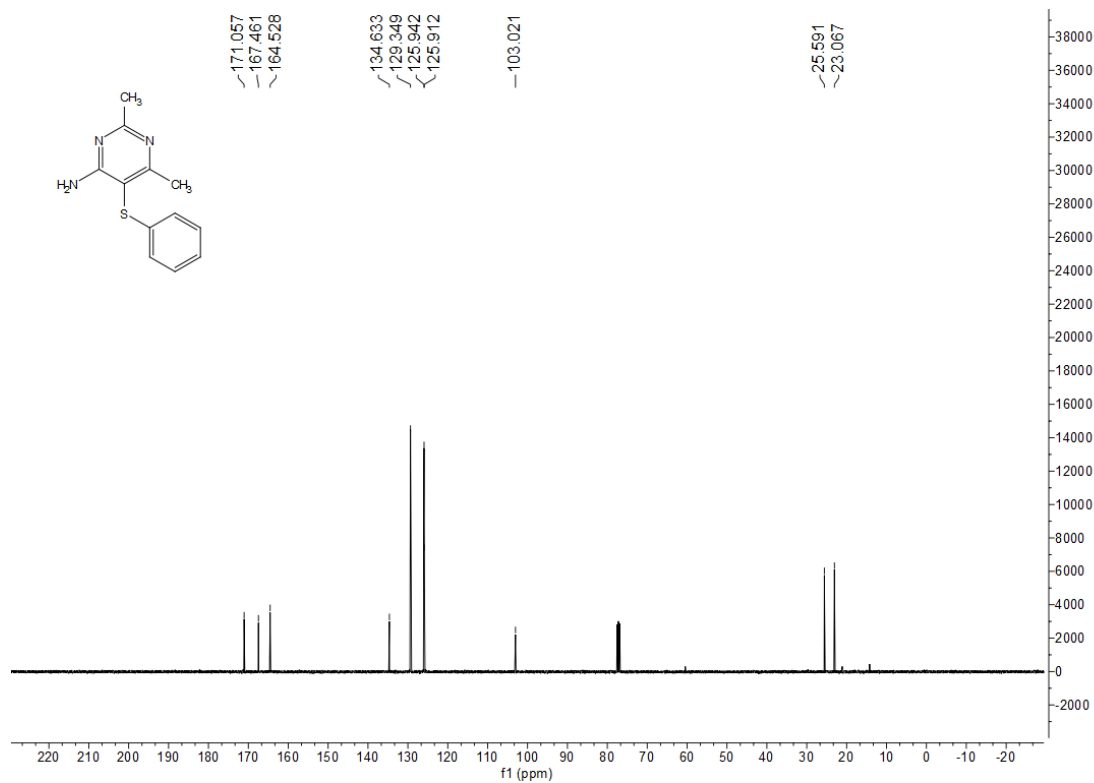

# Compound (2)

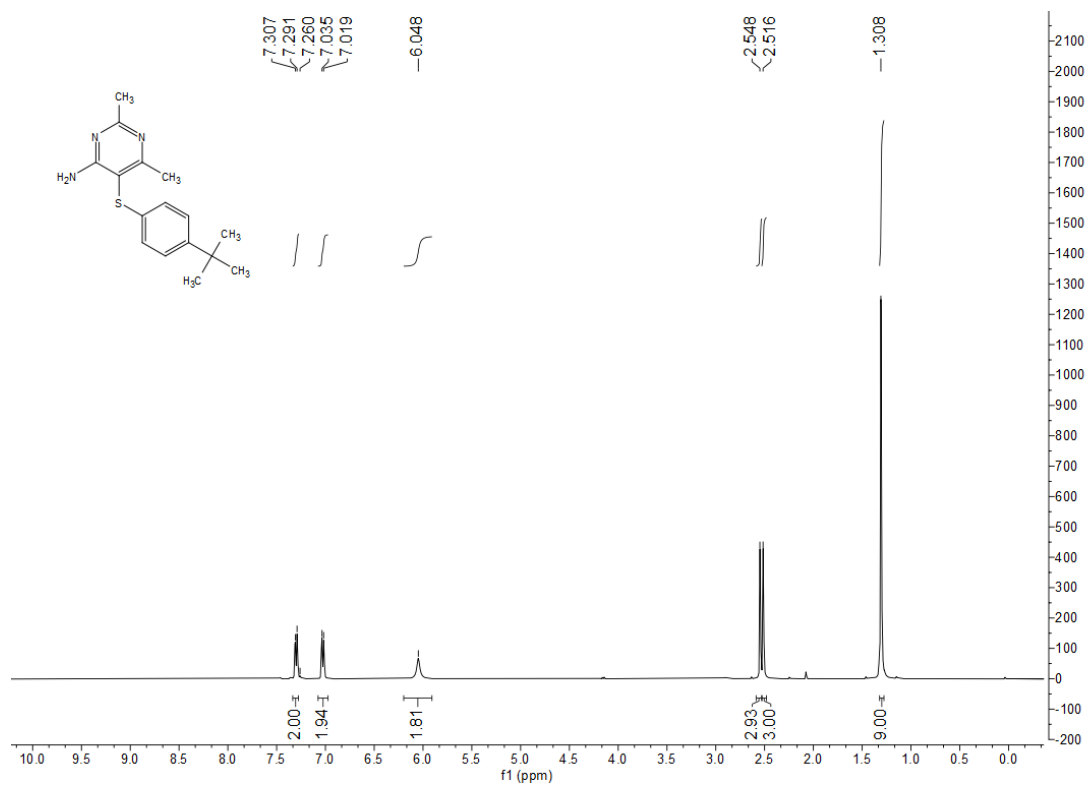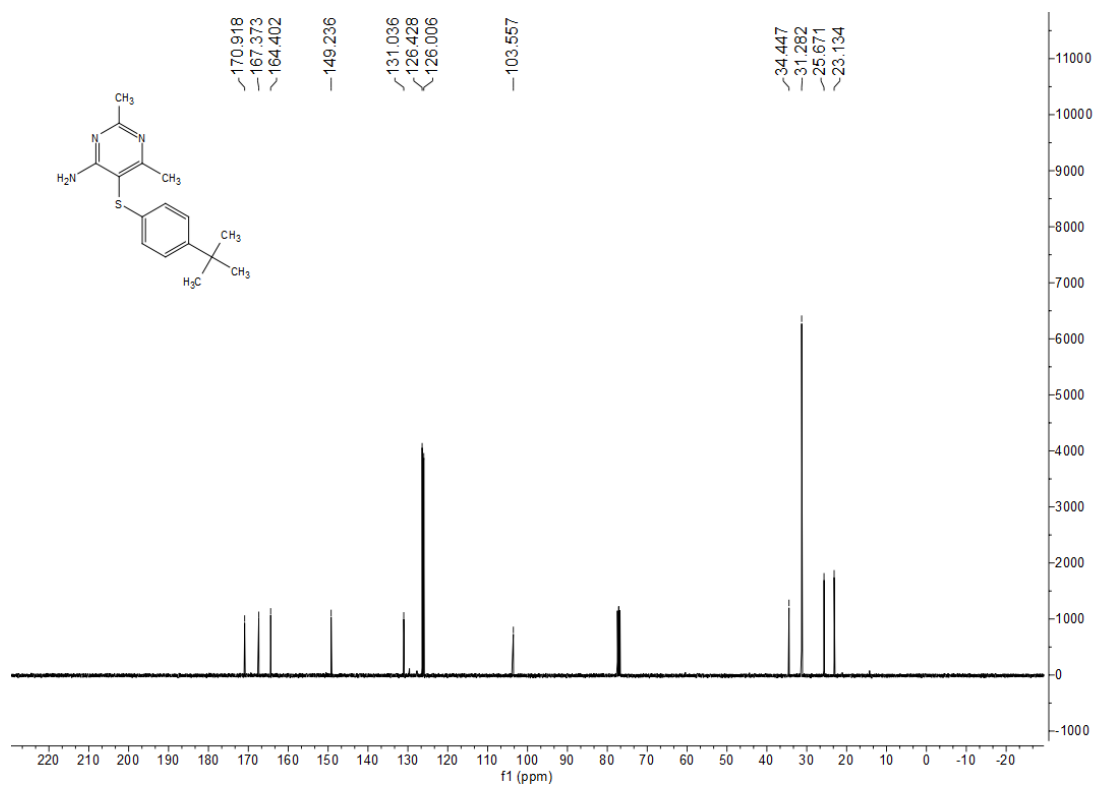

# Compound (3)

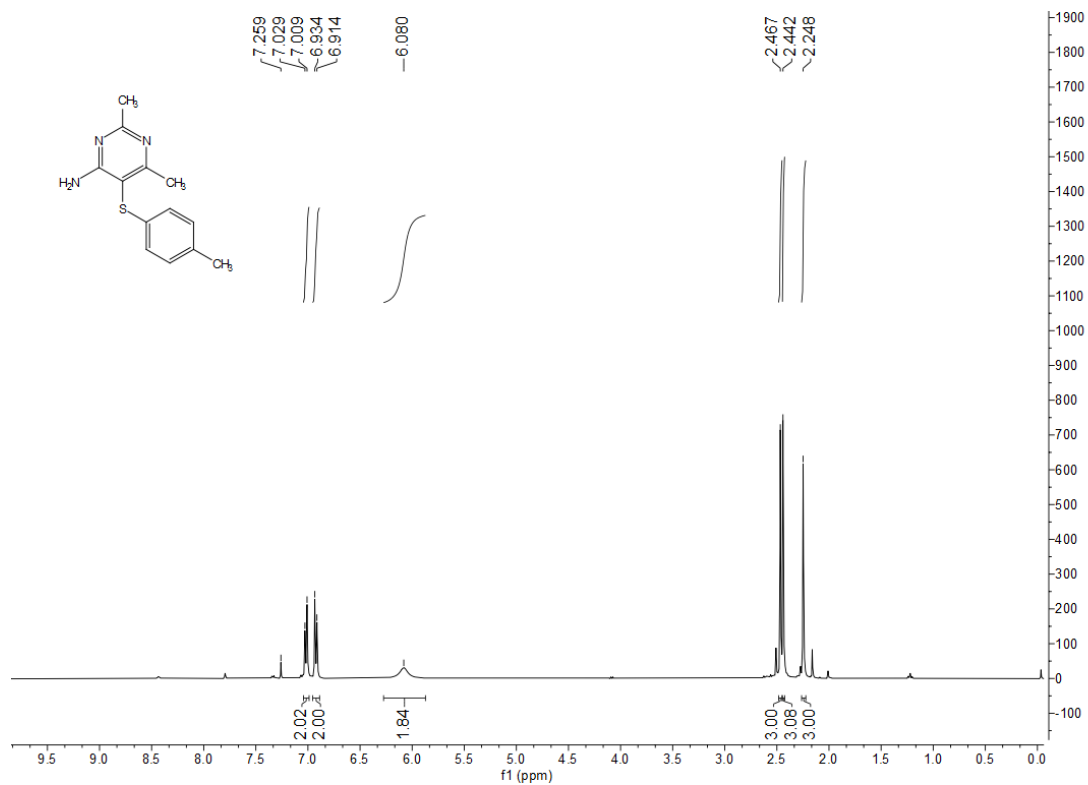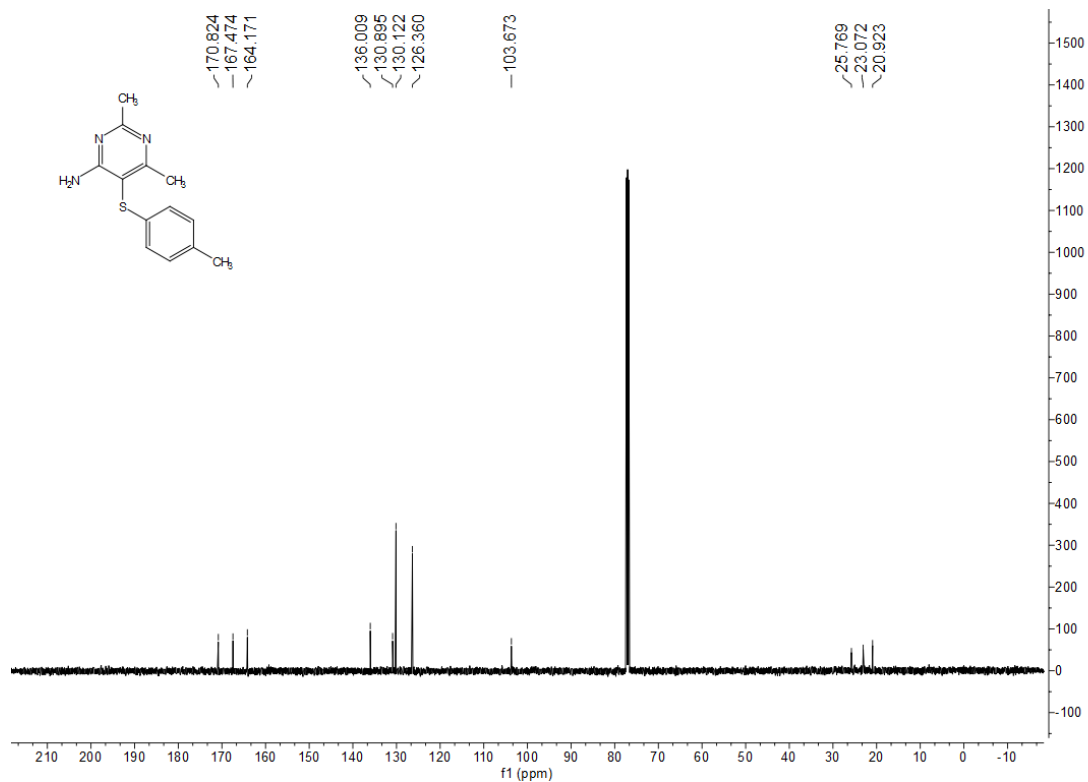

# Compound (4)

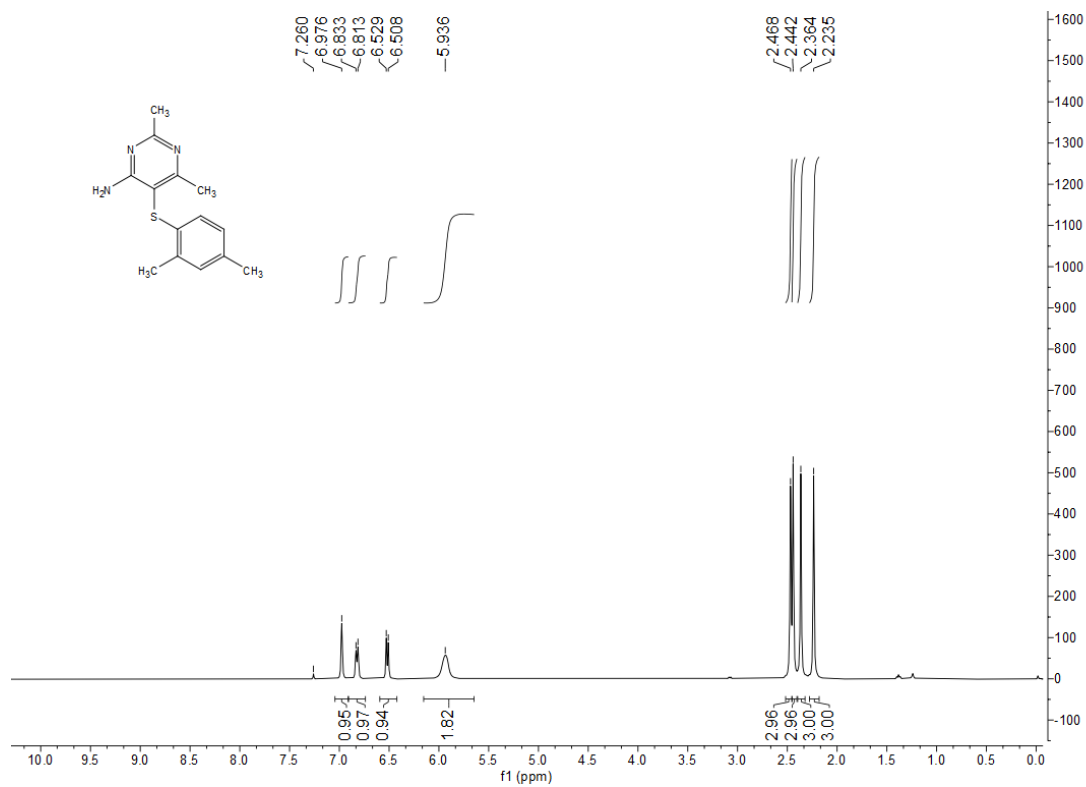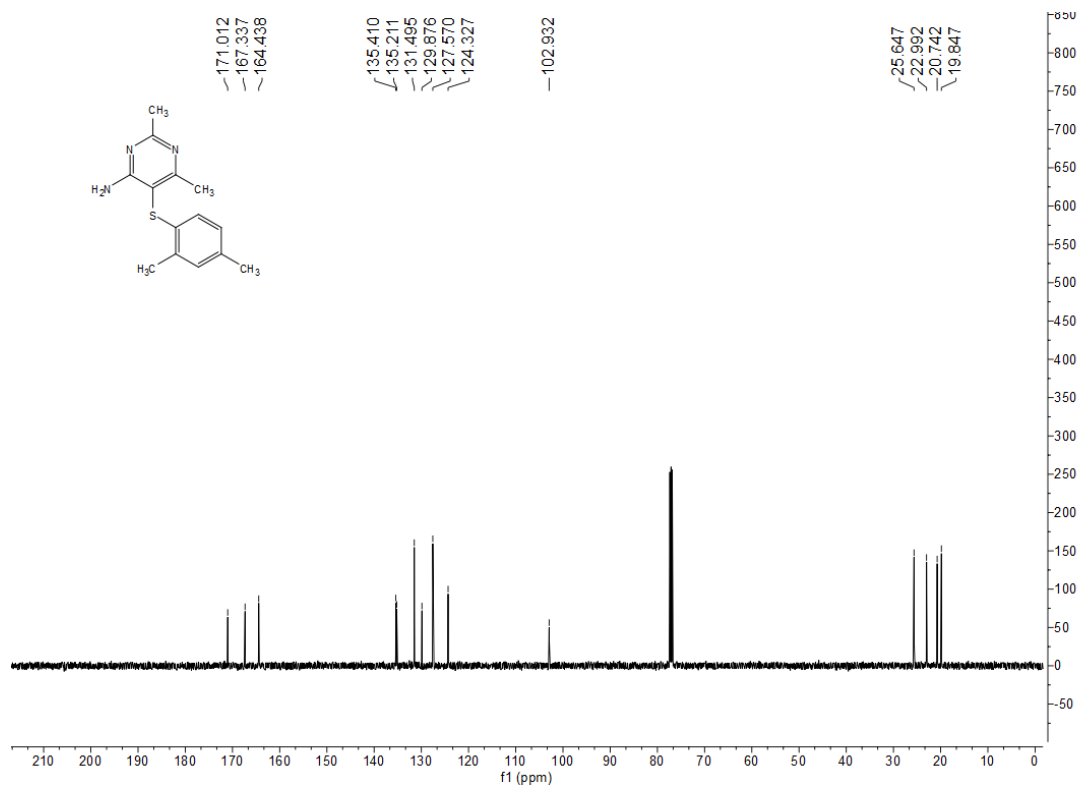

# Compound (5)

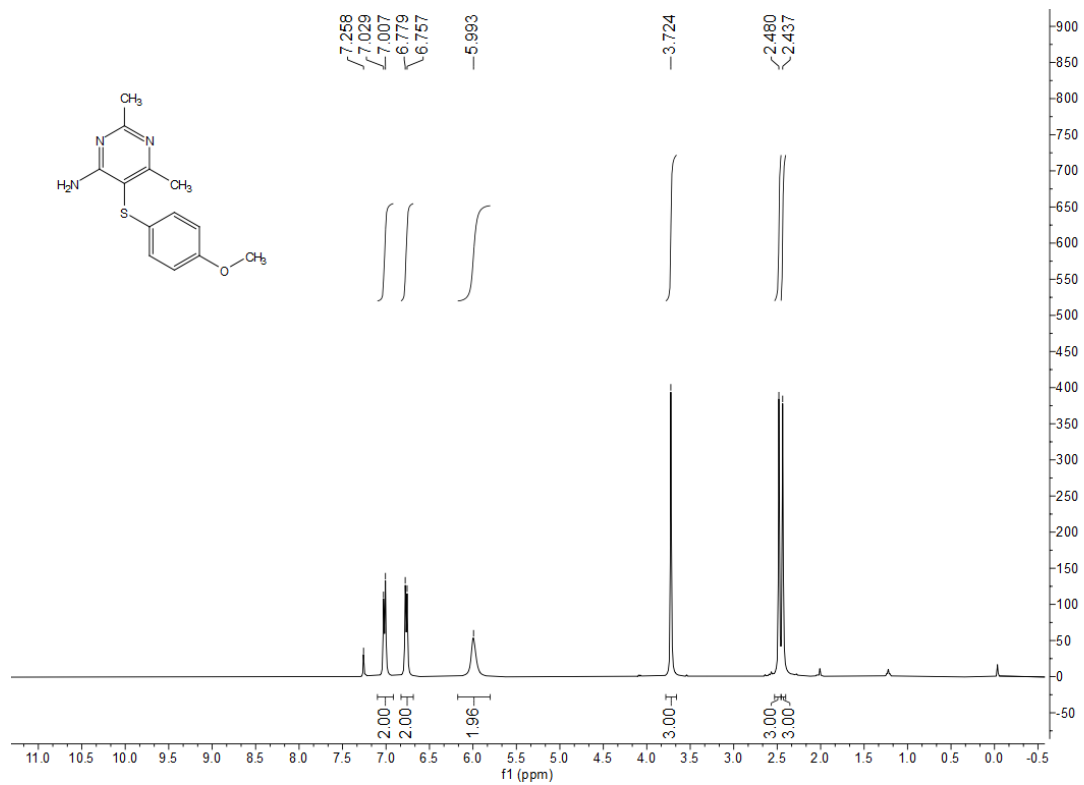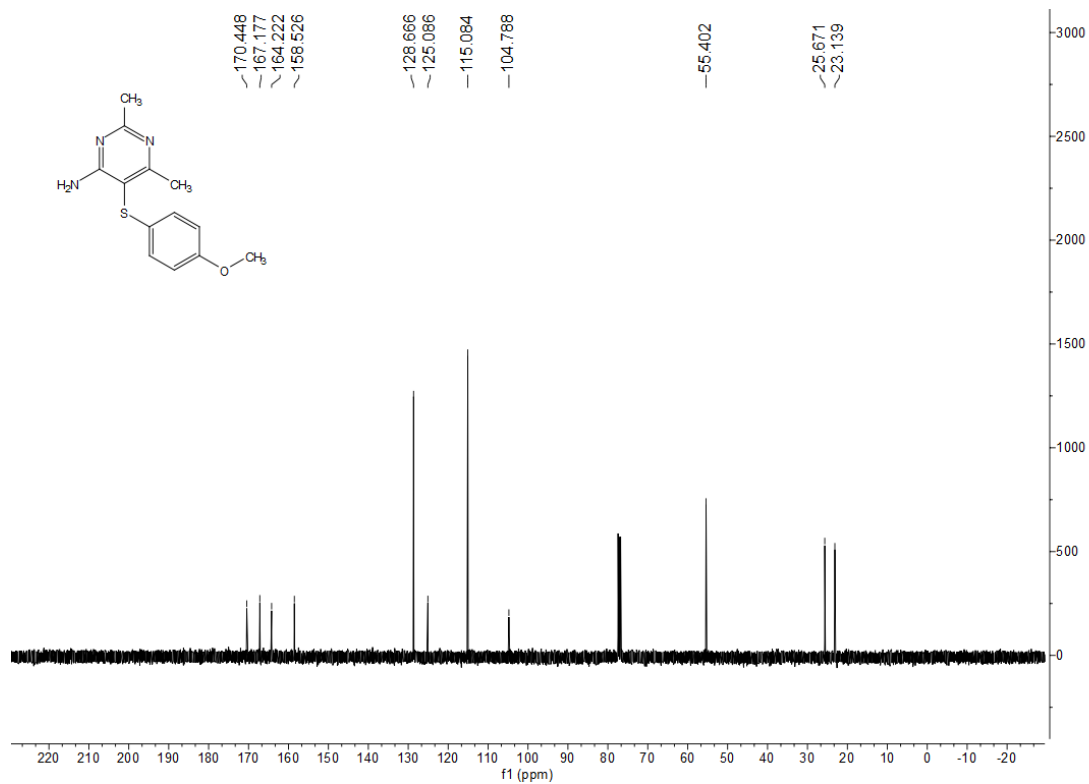

# Compound (6)

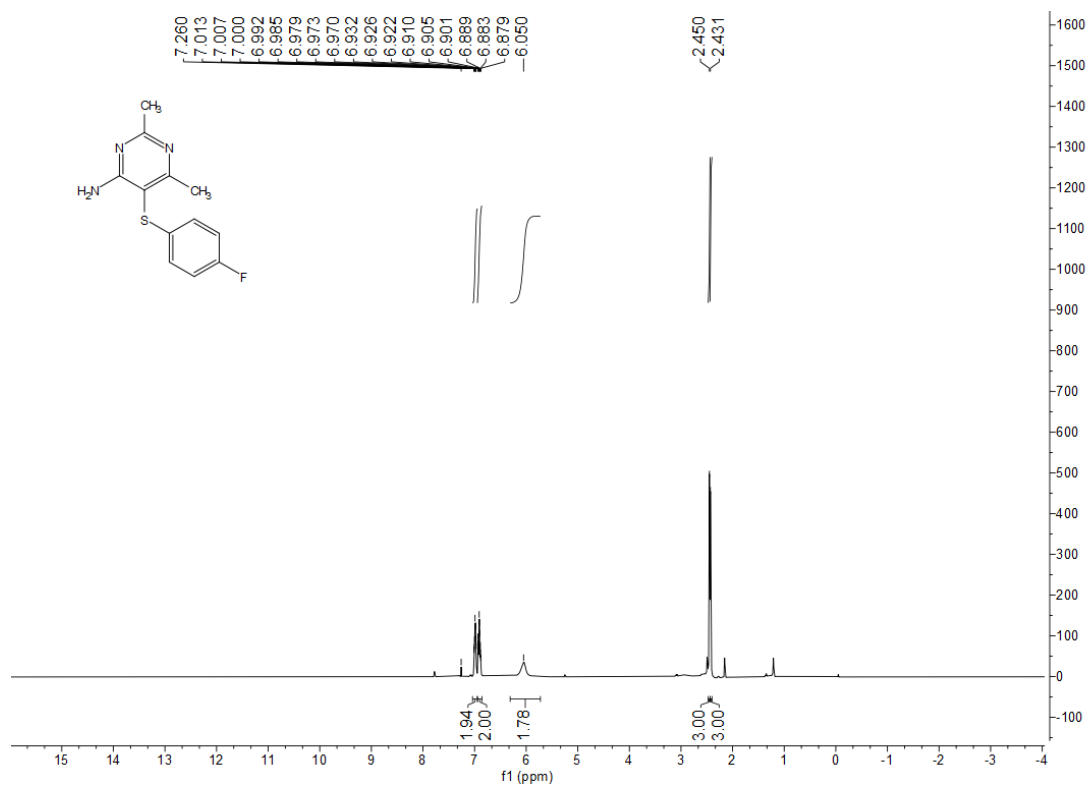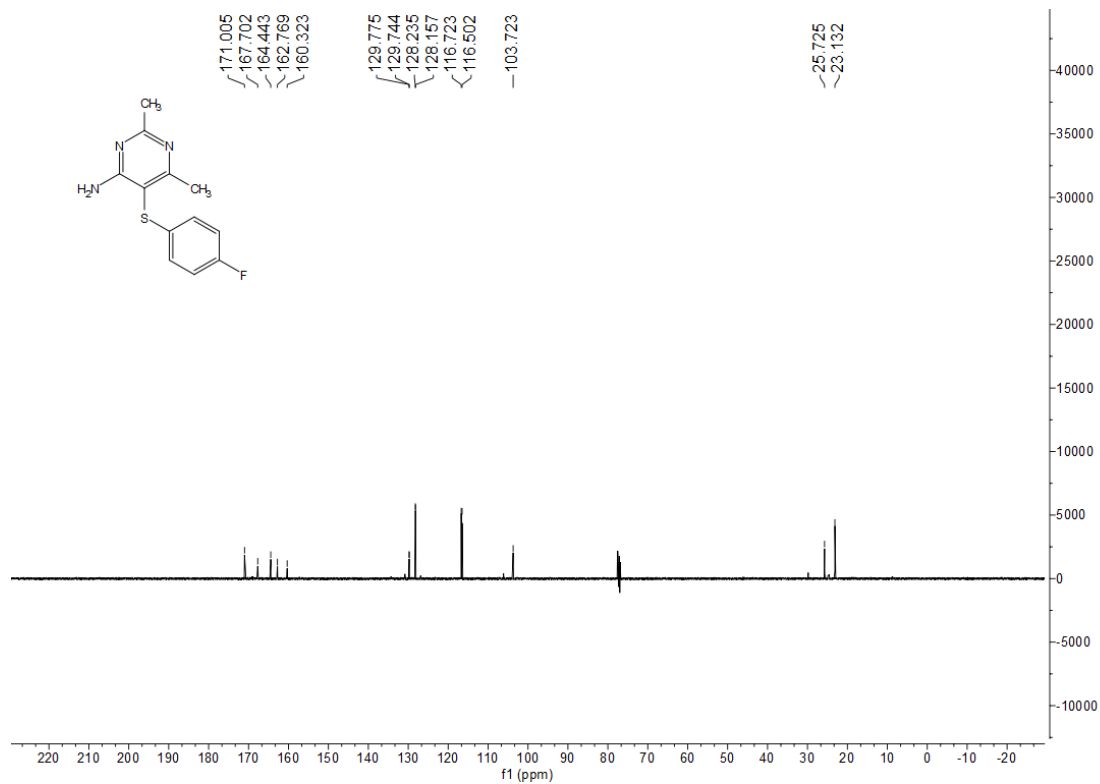



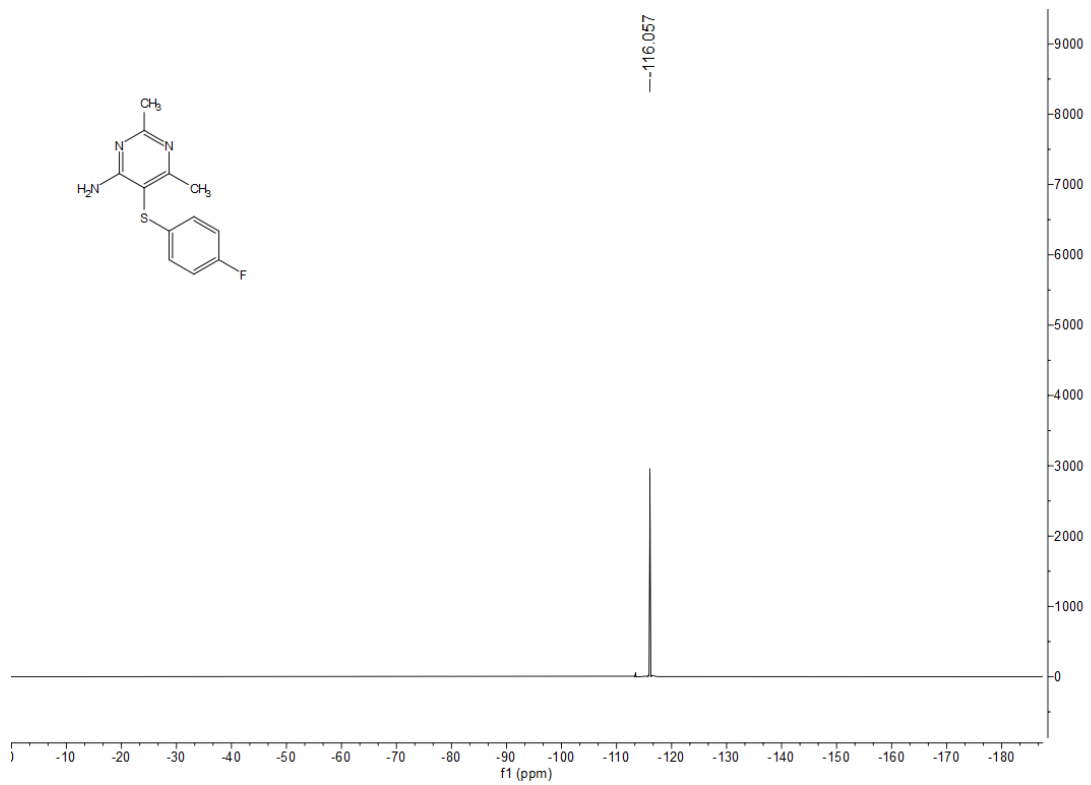

# Compound (7)

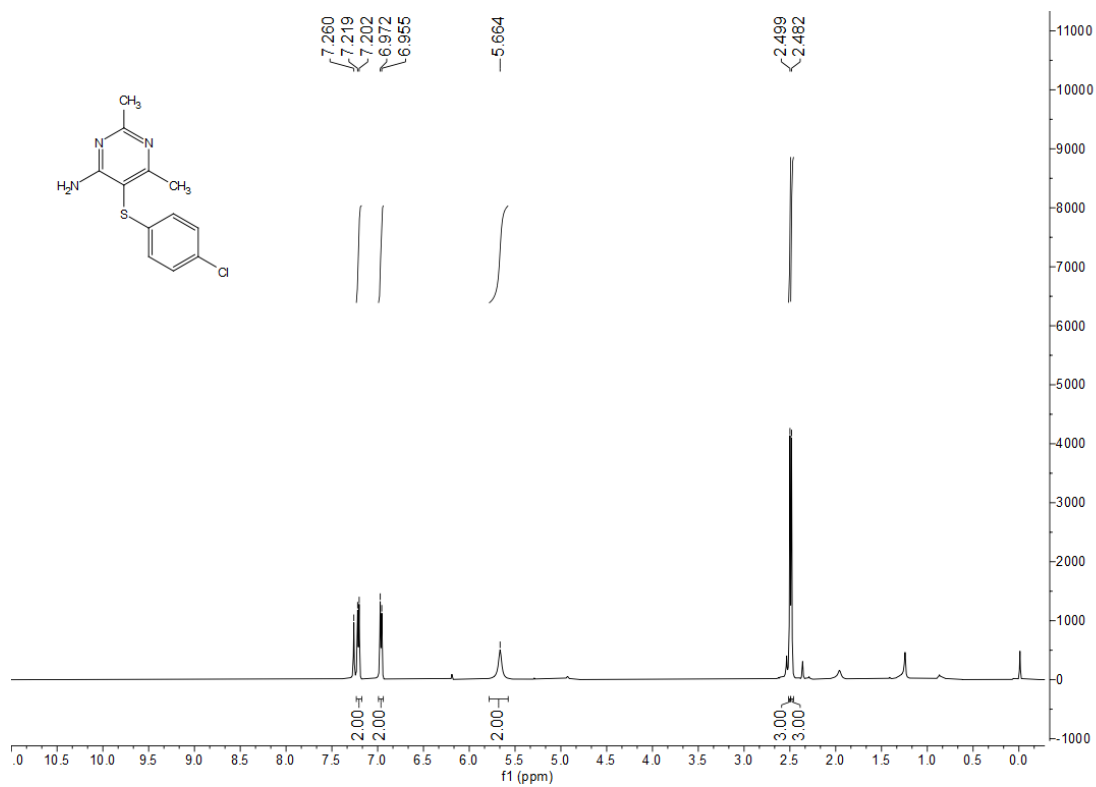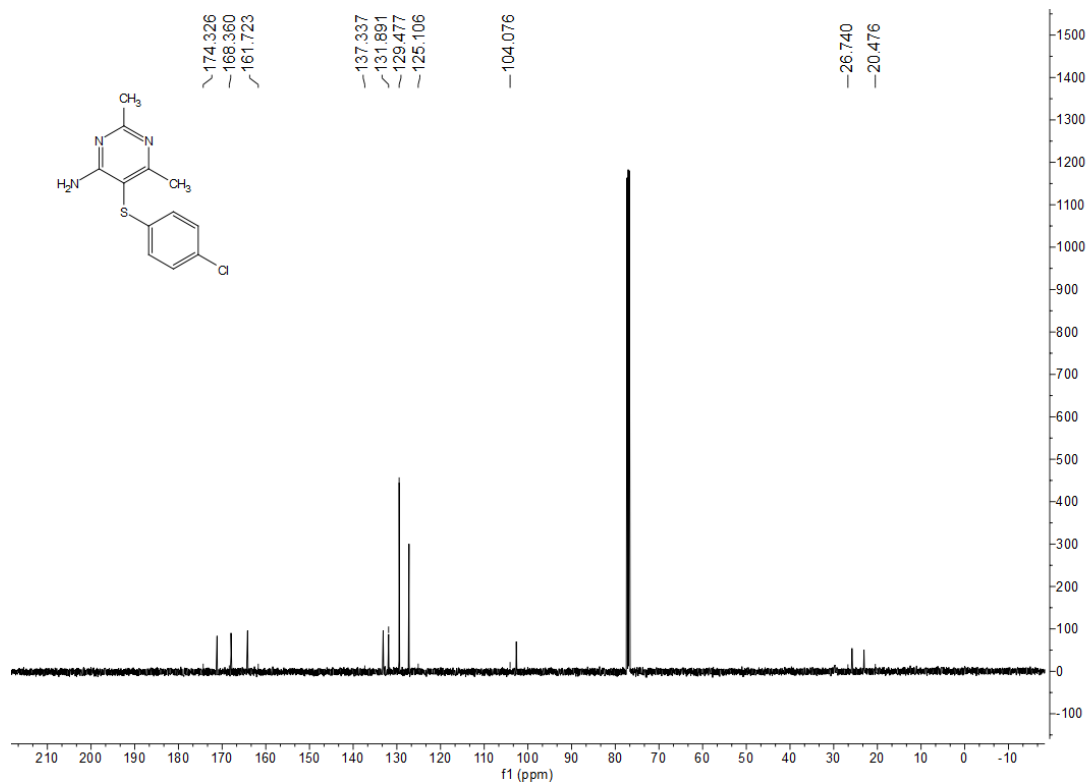

# Compound (8)

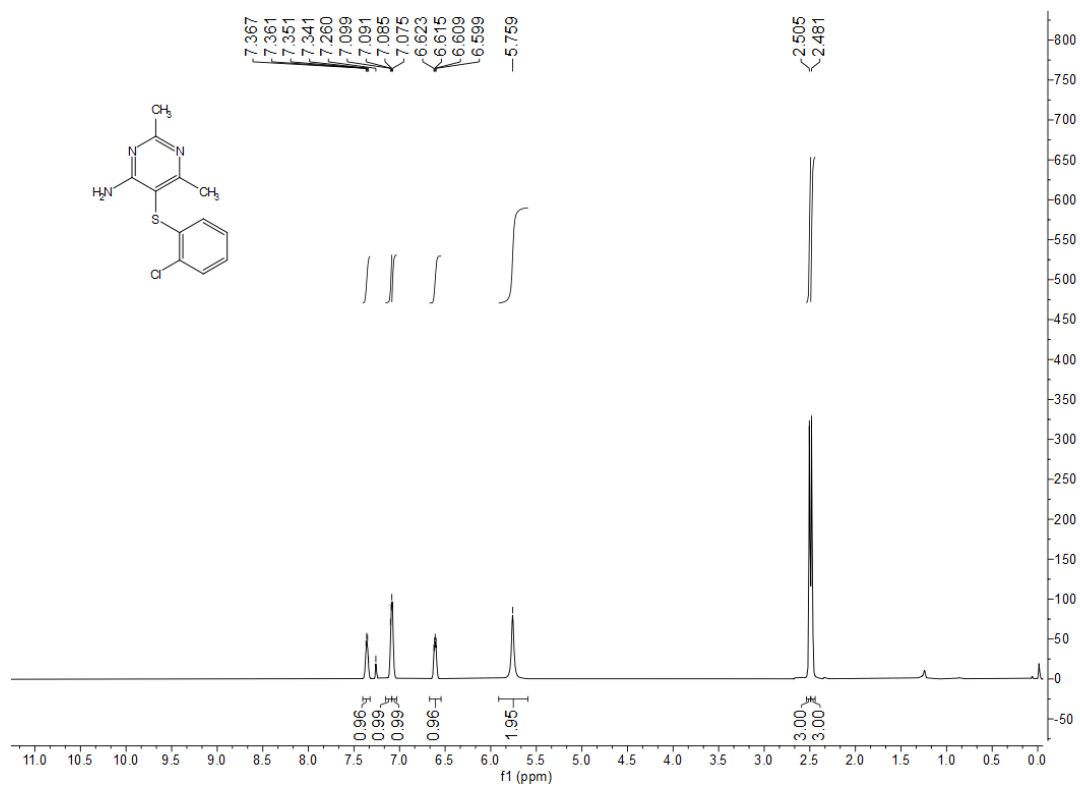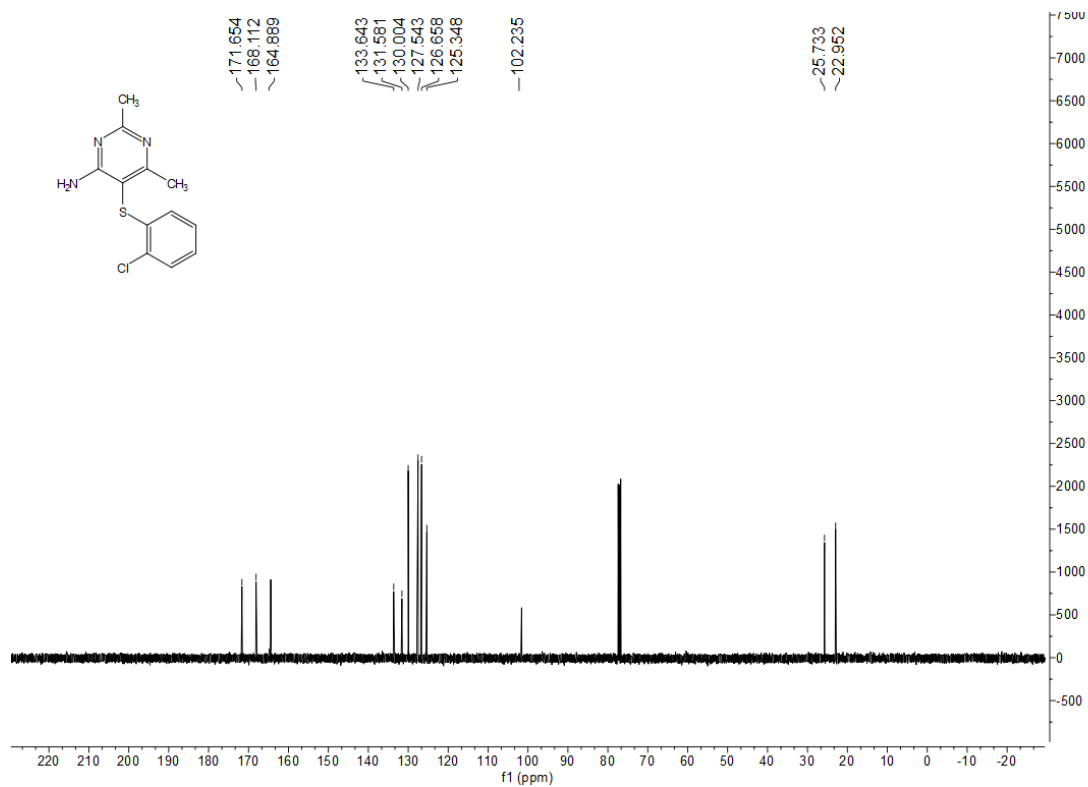

# Compound (9)

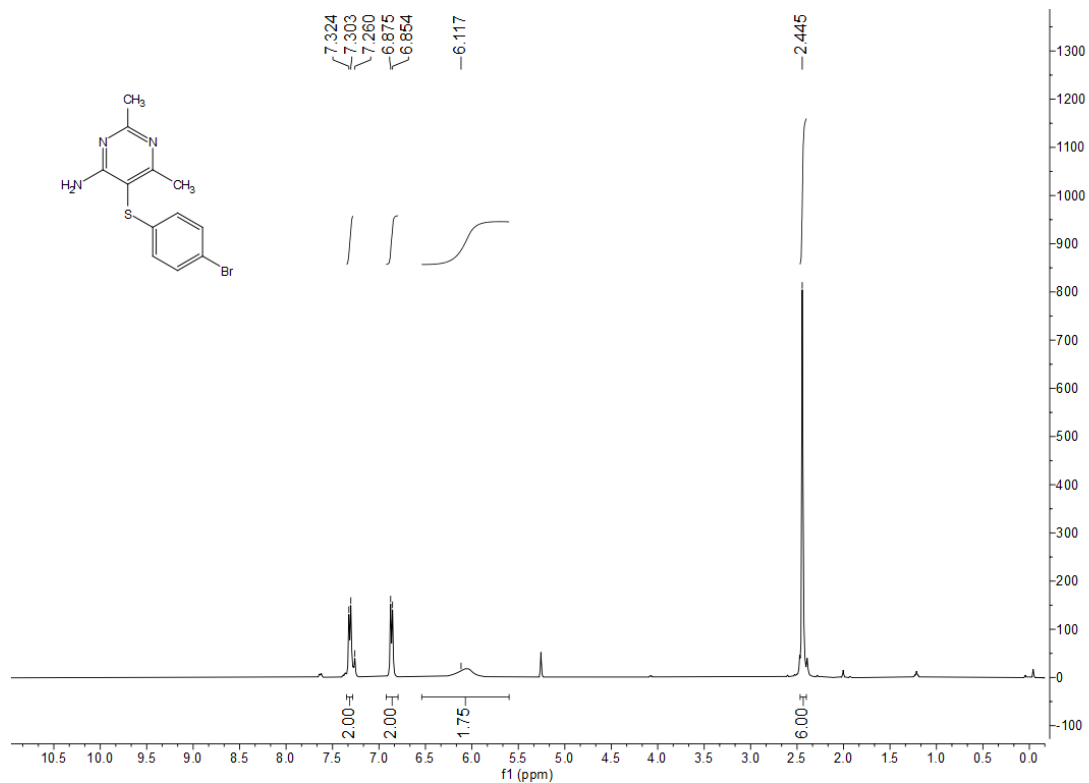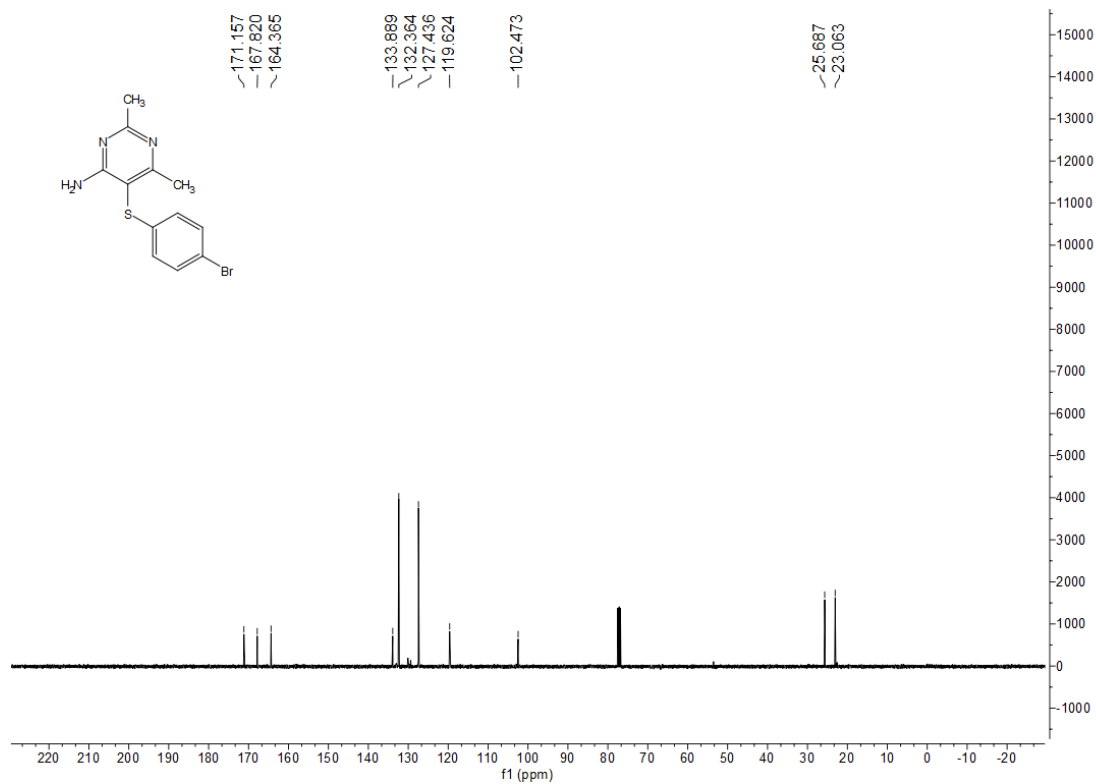

# Compound (10)

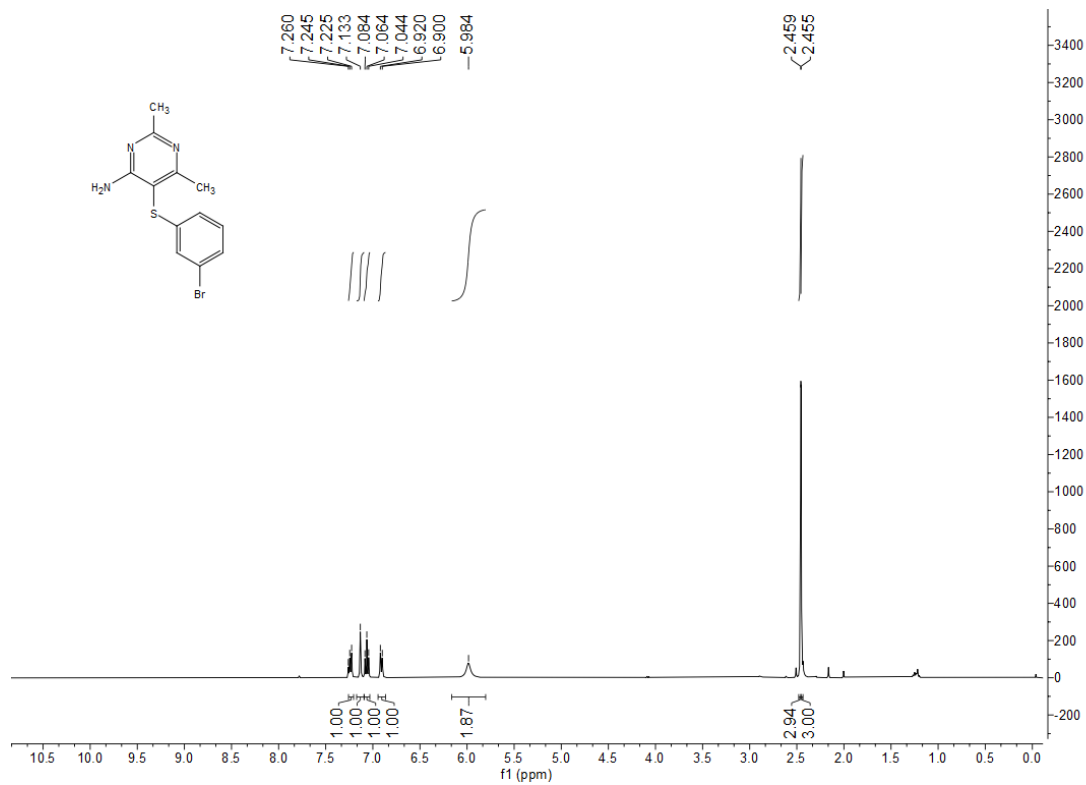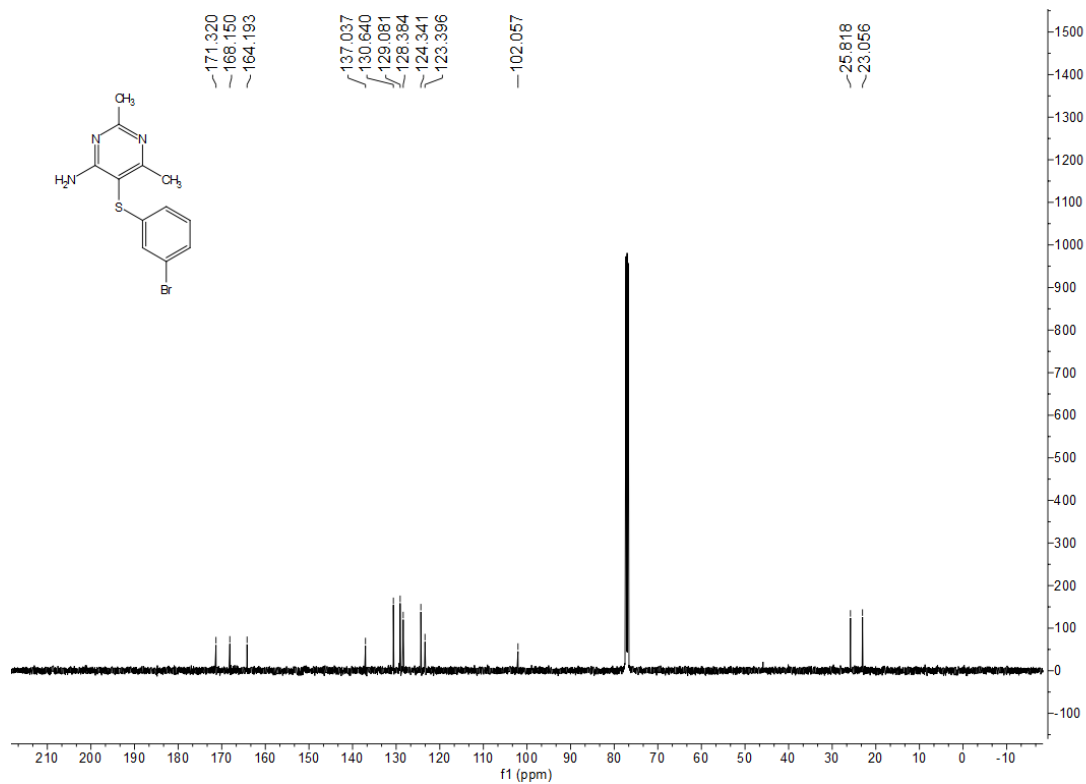

# Compound (11)

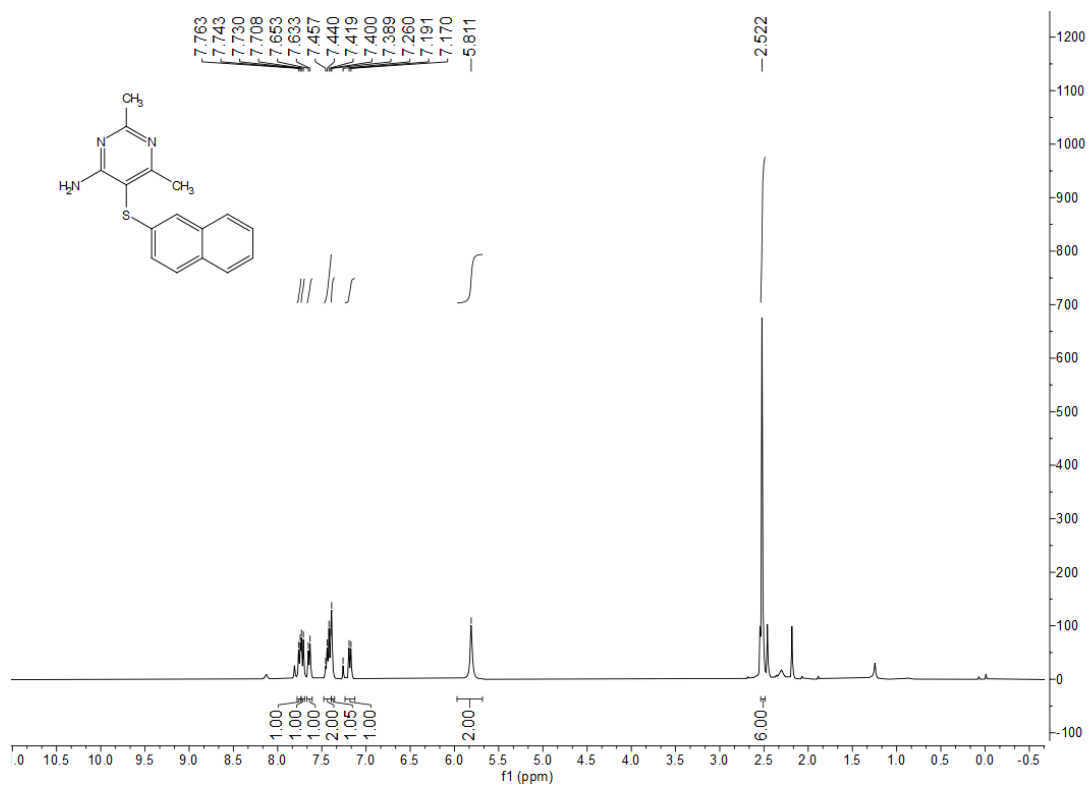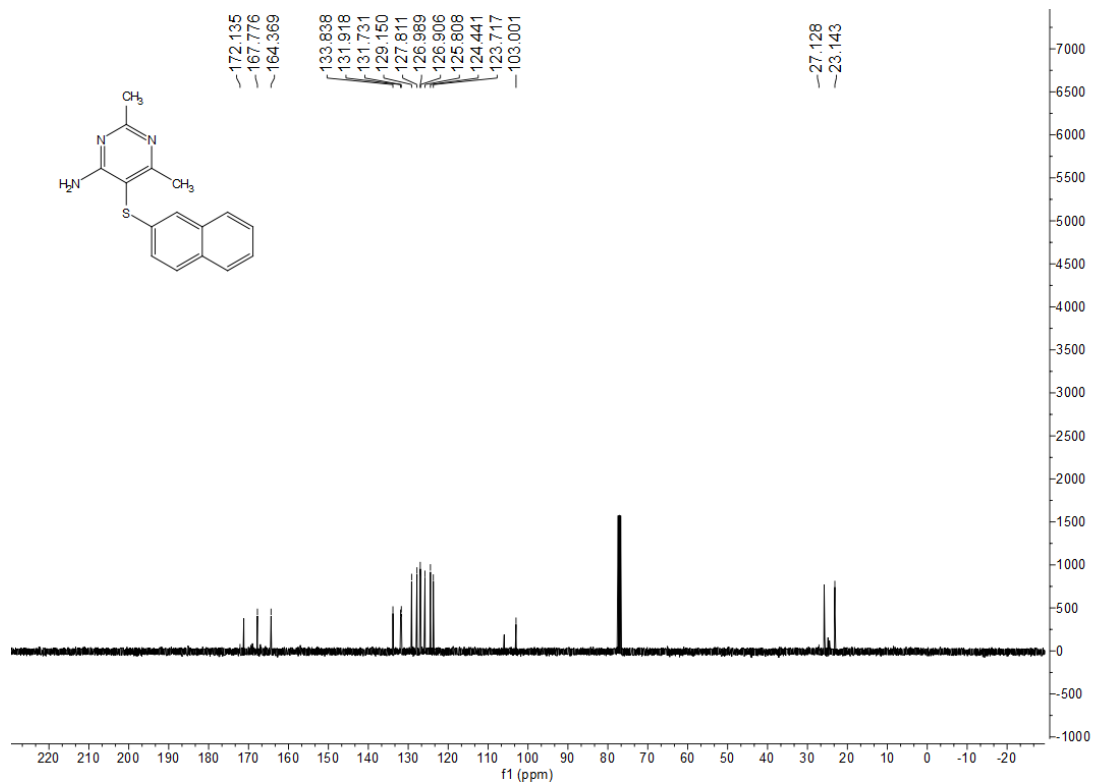

# Compound (12)

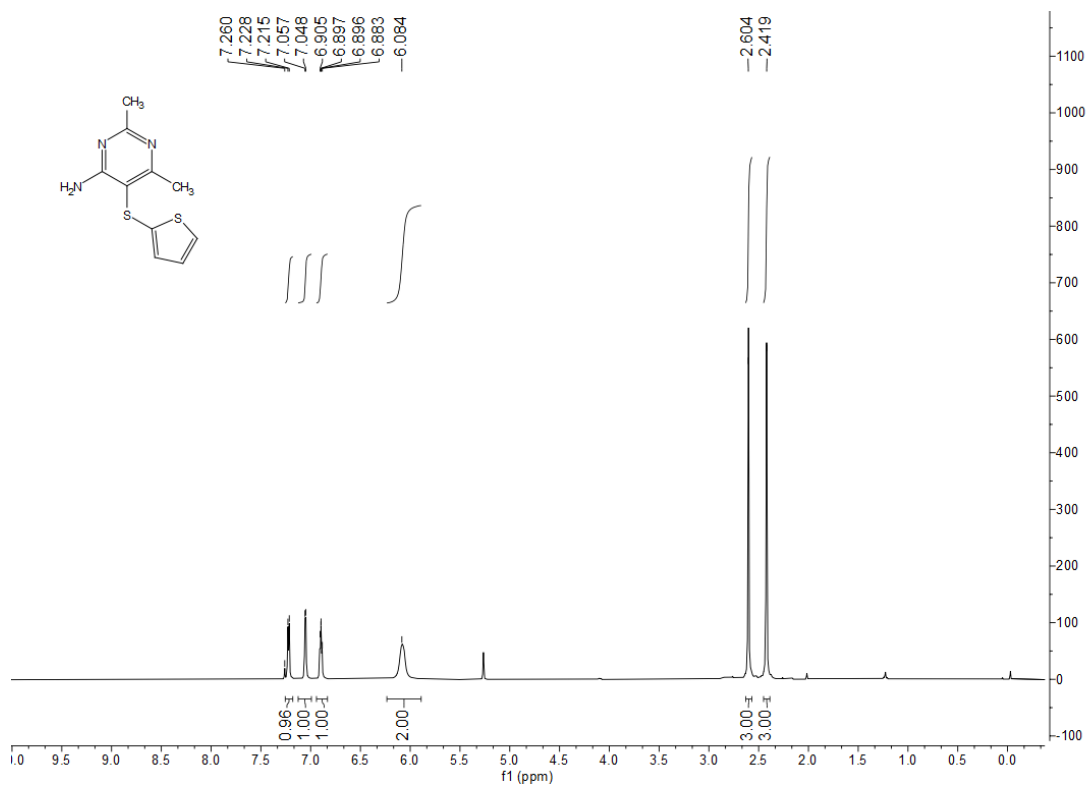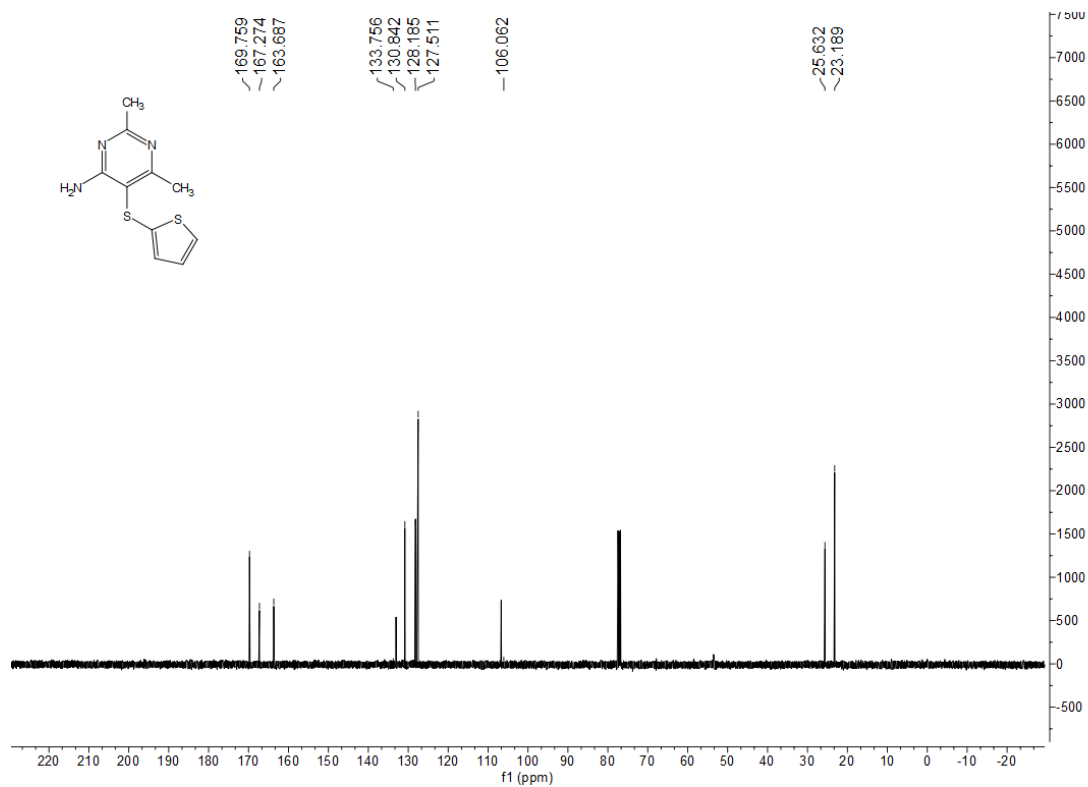

# Compound (13)

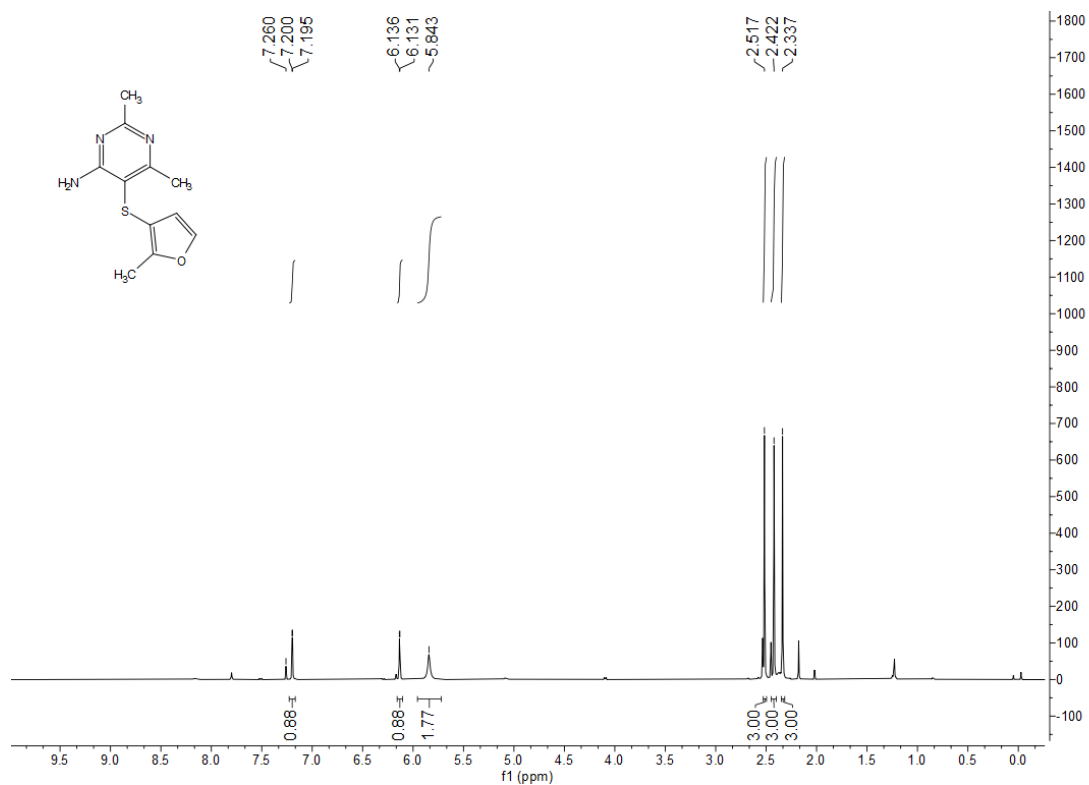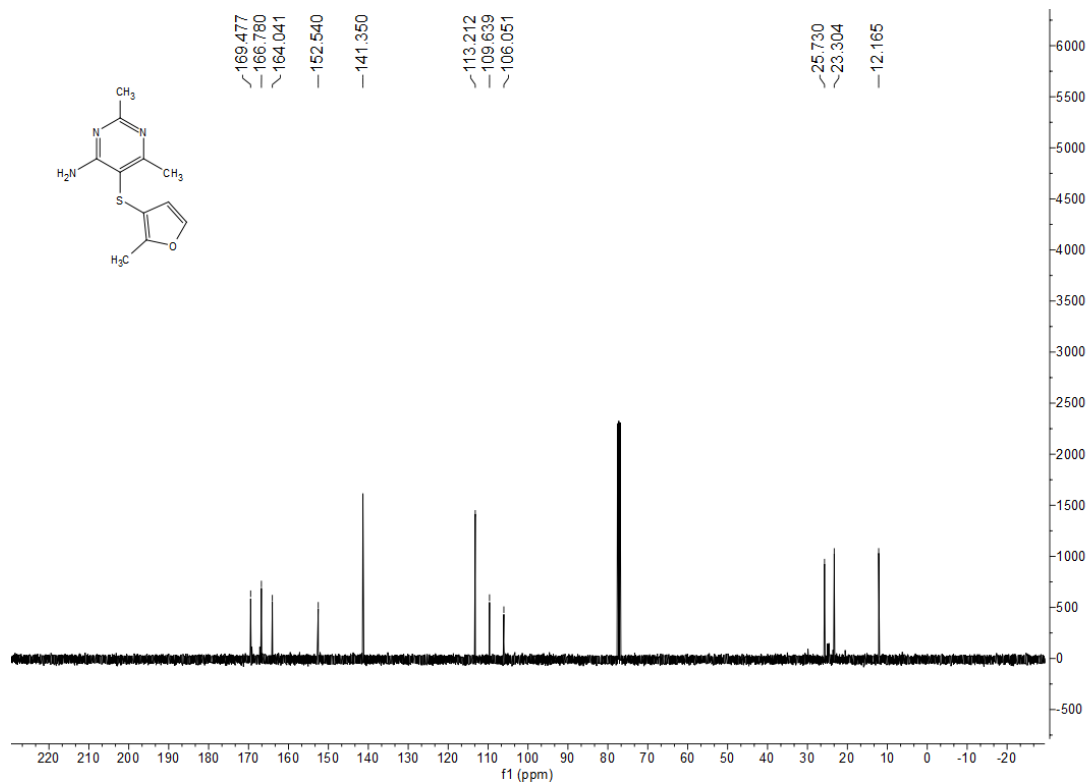



# Compound (14)

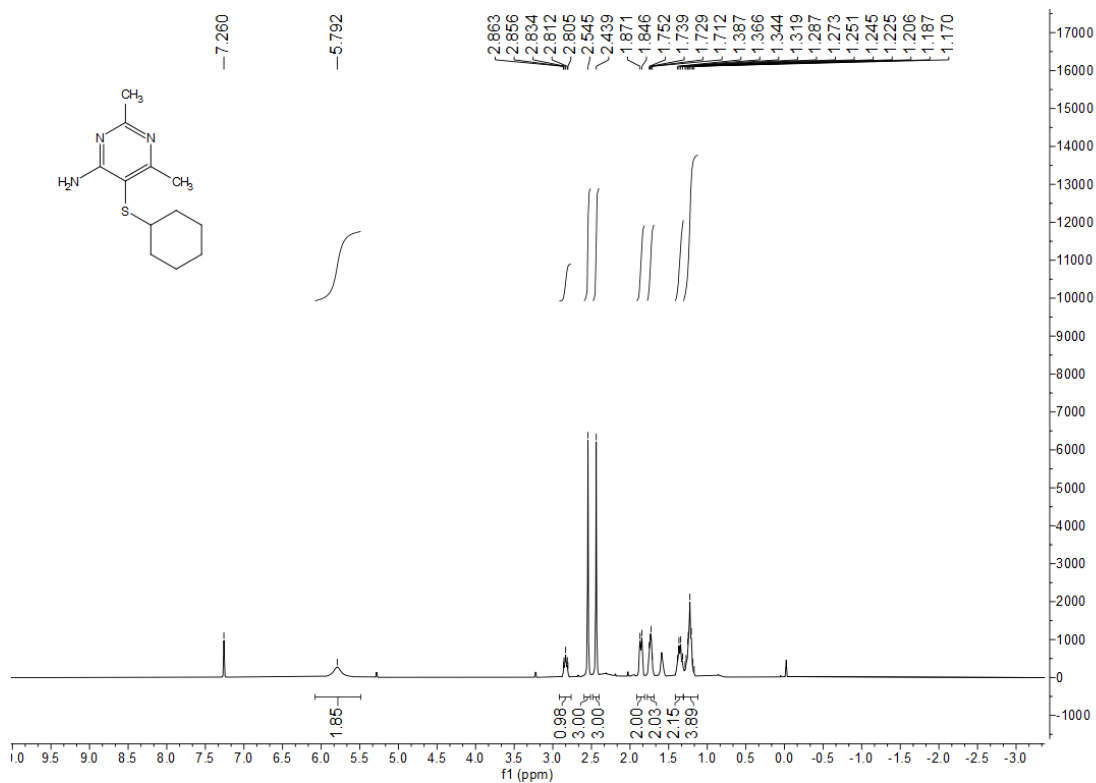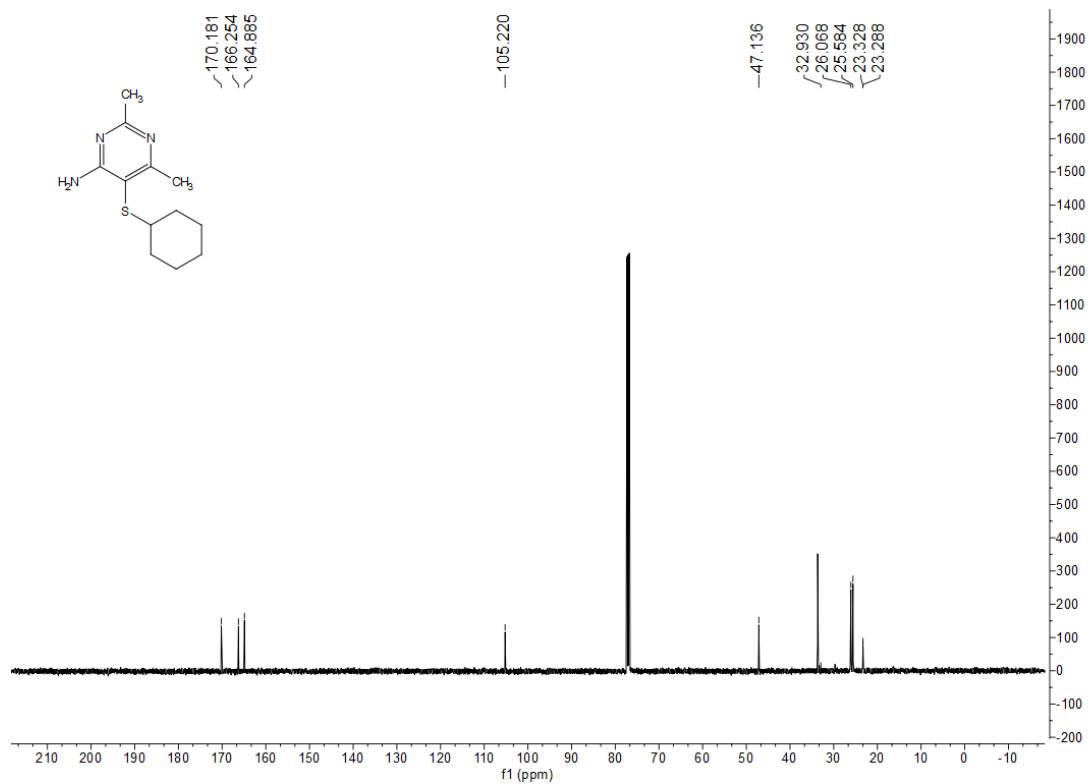

# Compound (15)

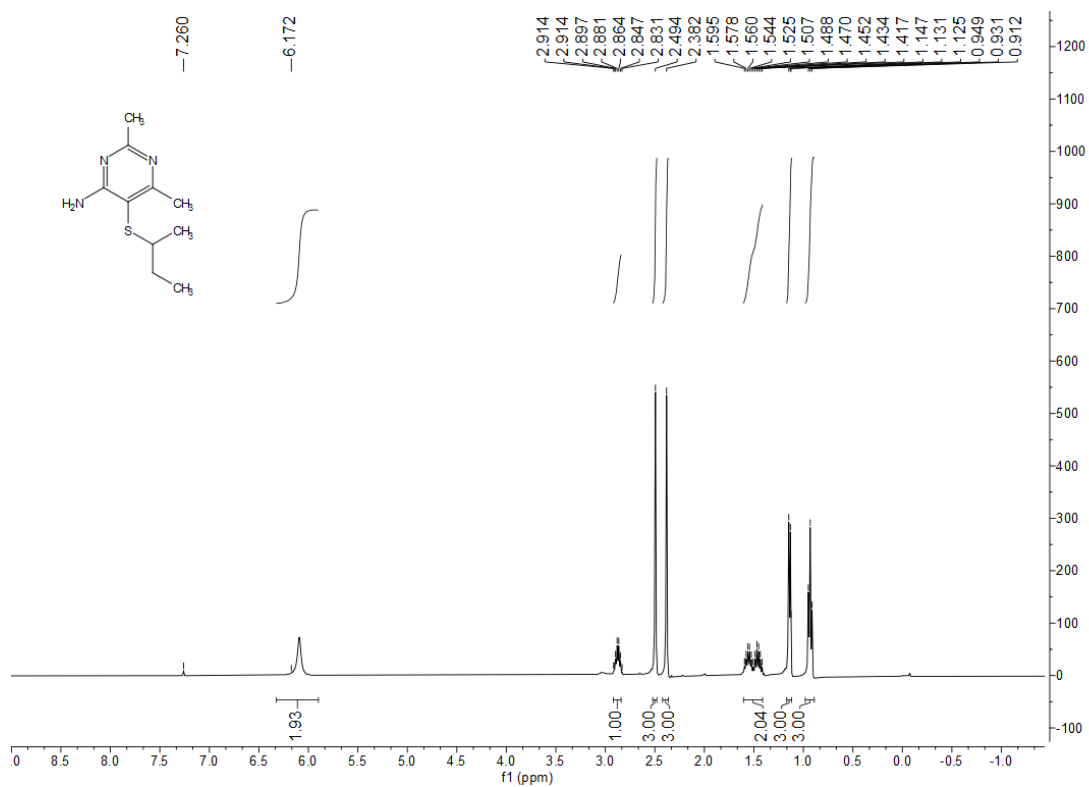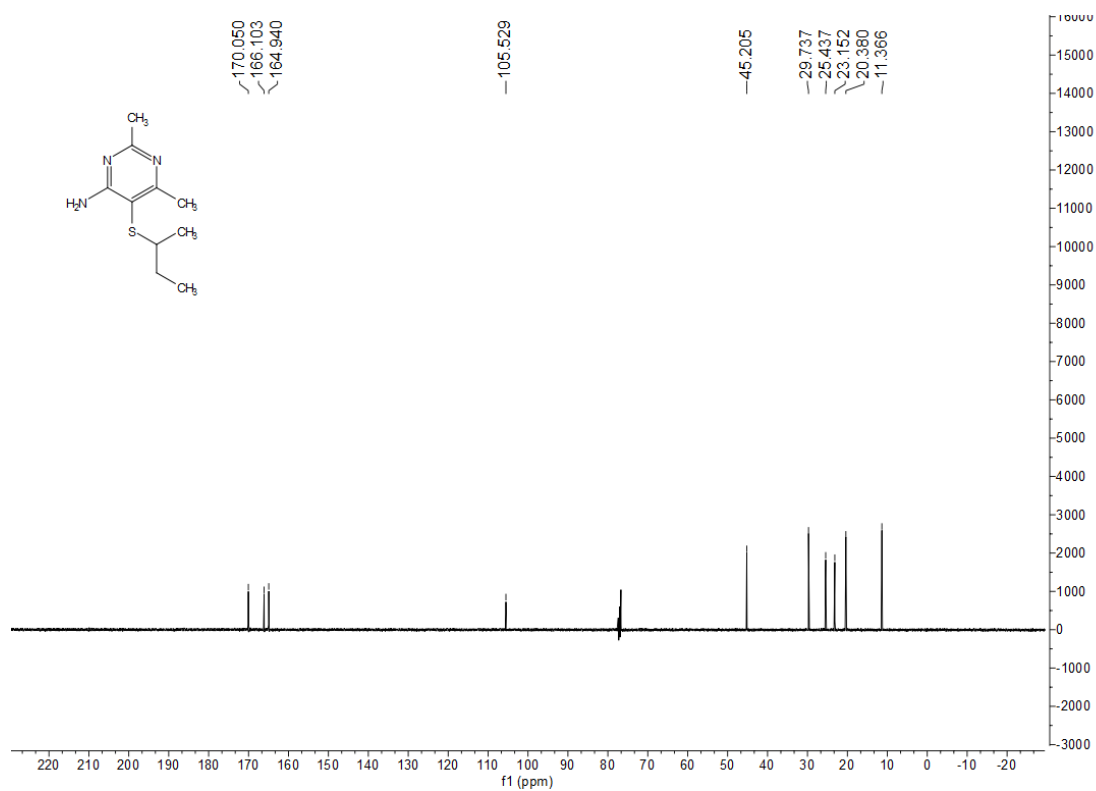

# Compound (16)

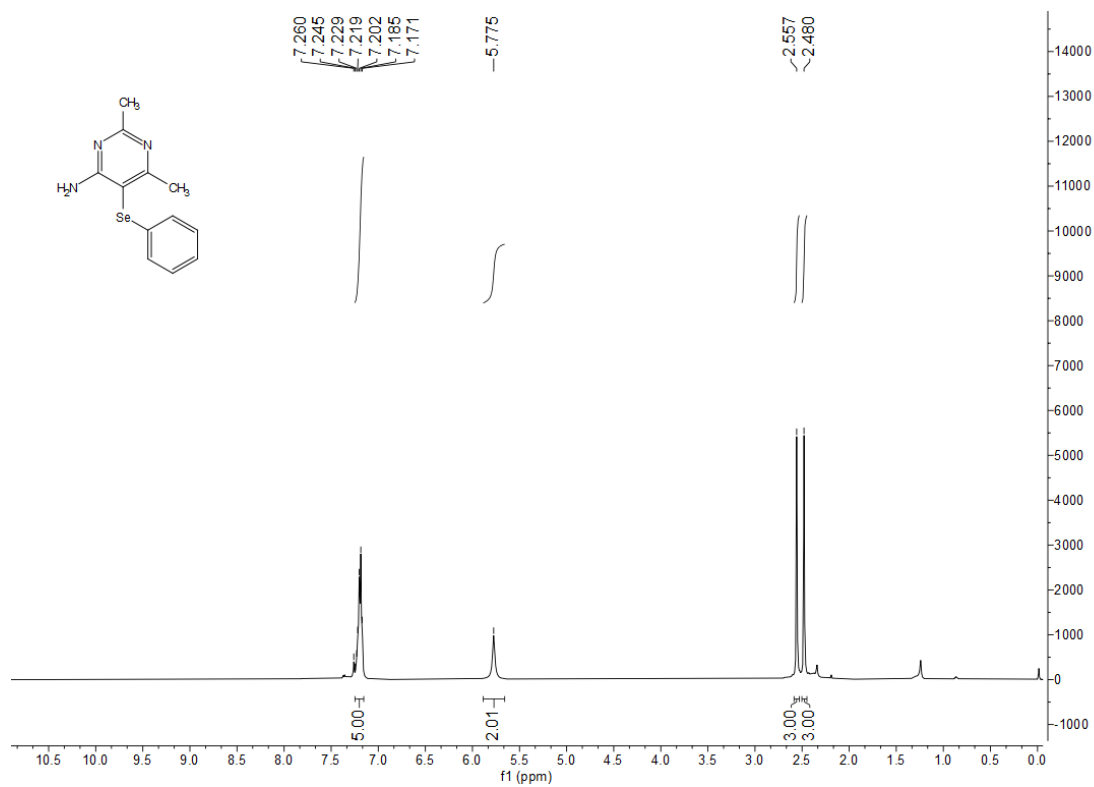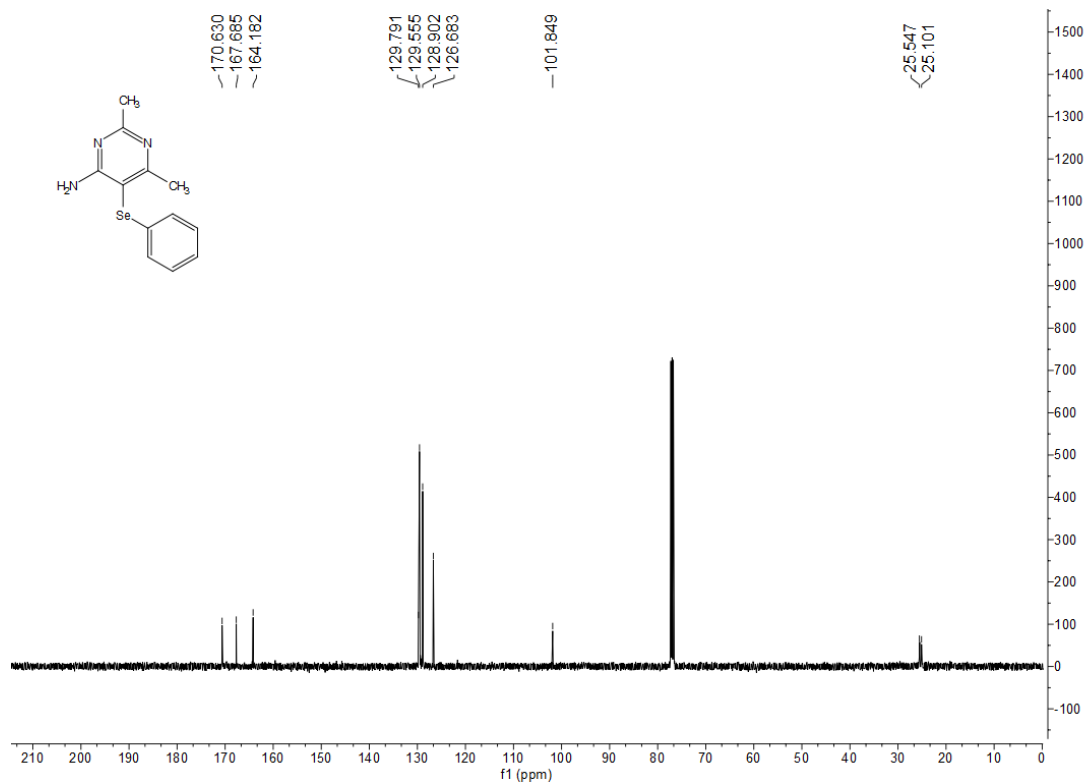

# Compound (17)

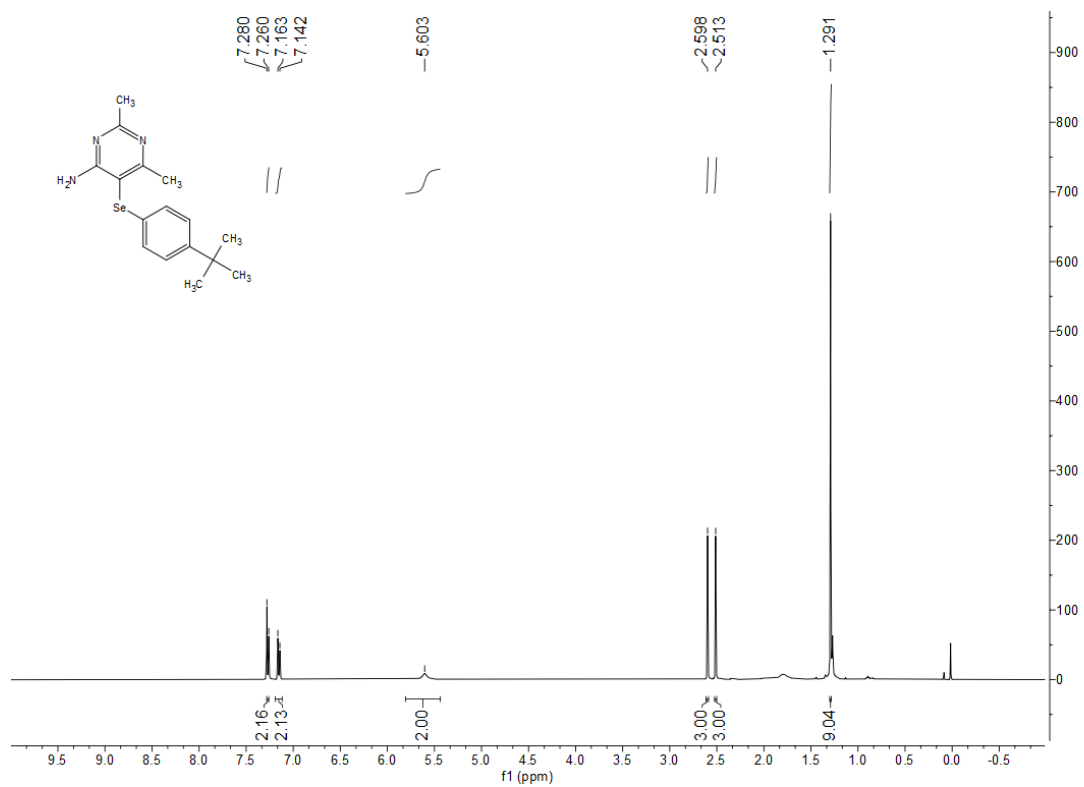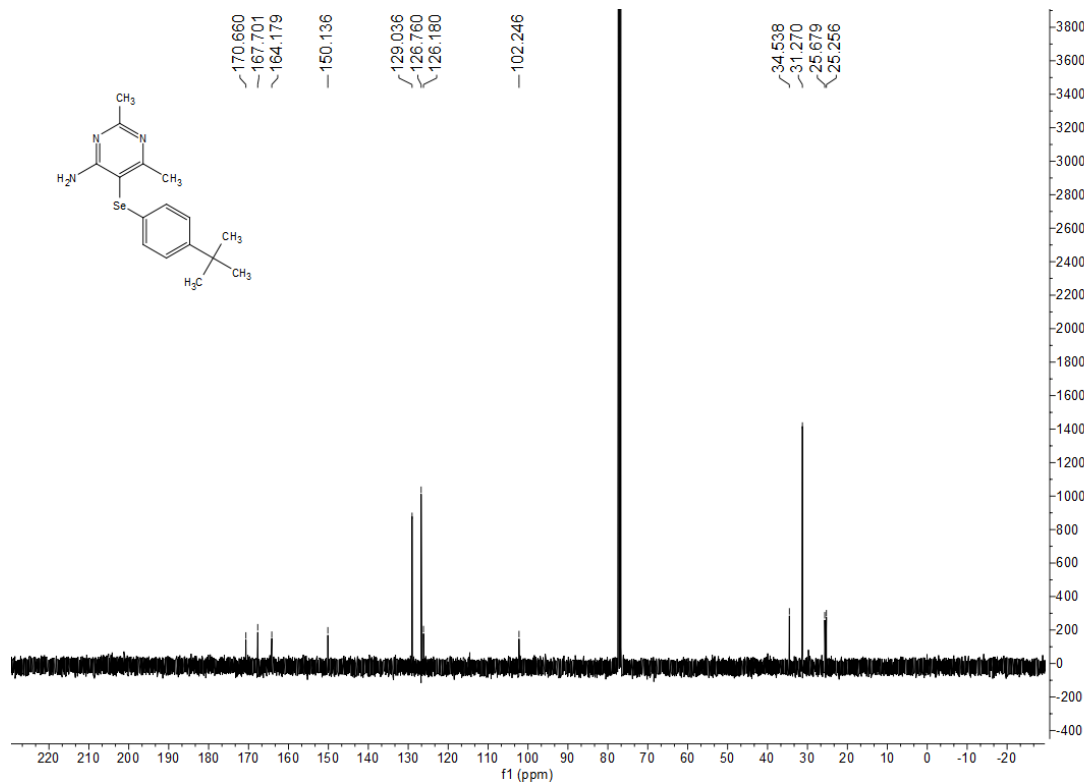

# Compound (18)

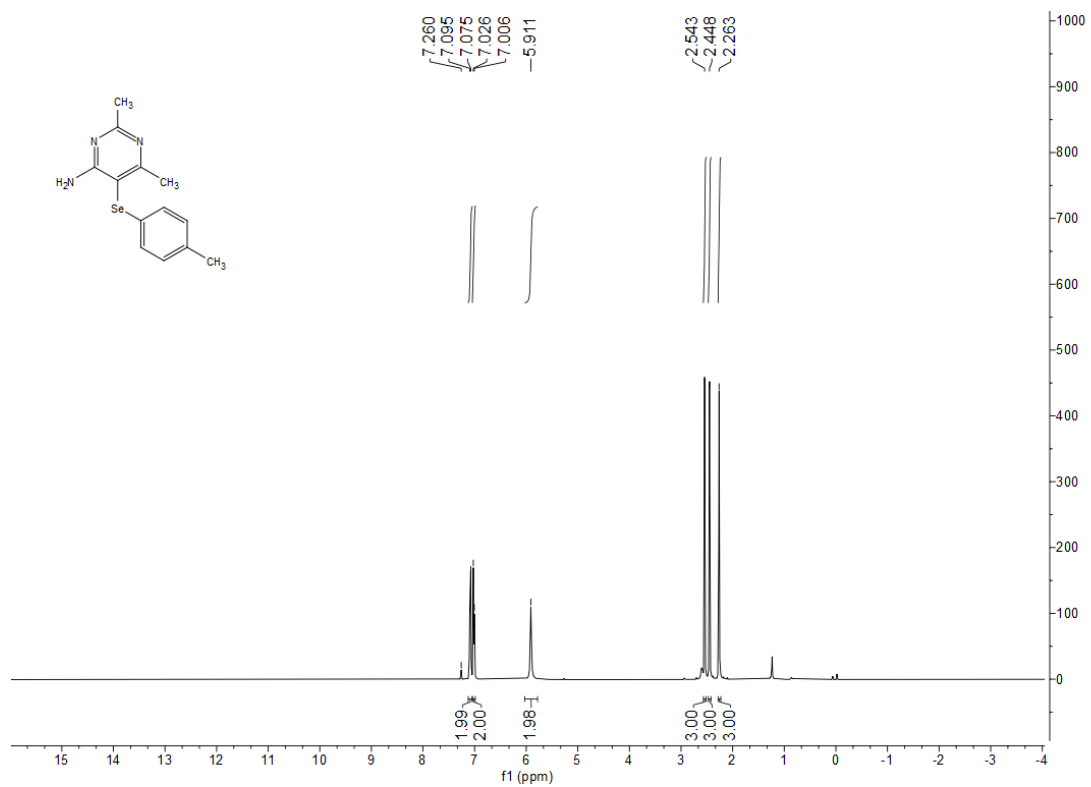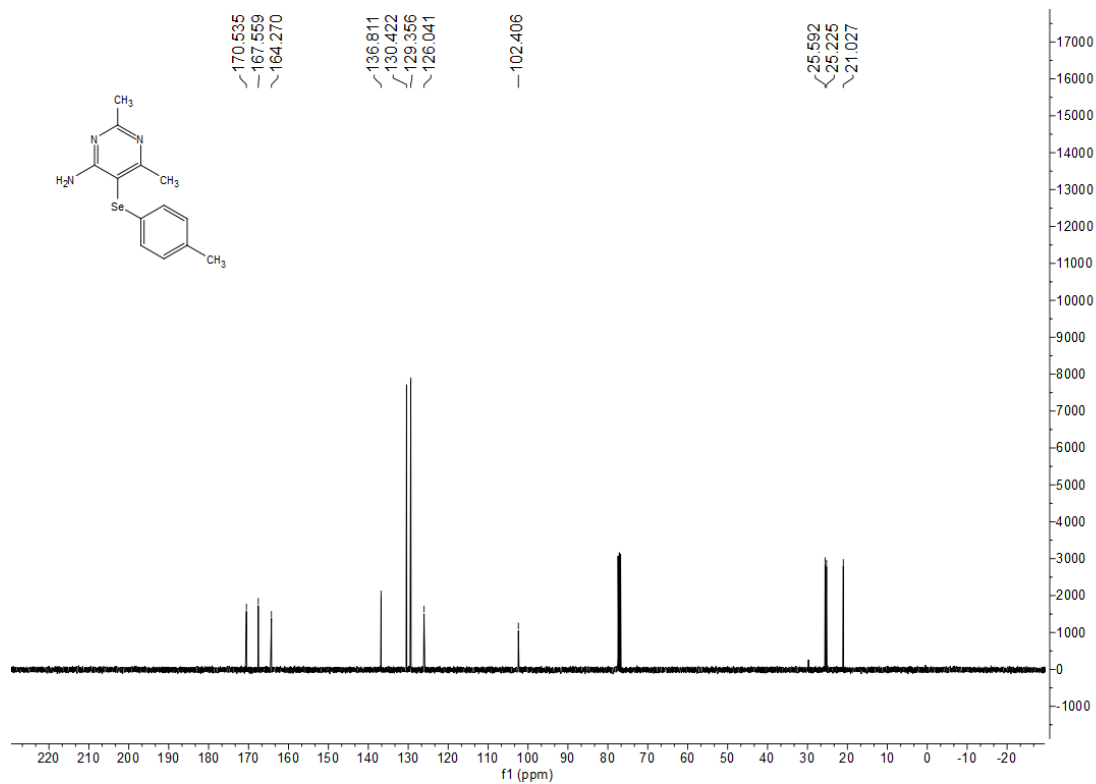

# Compound (19)

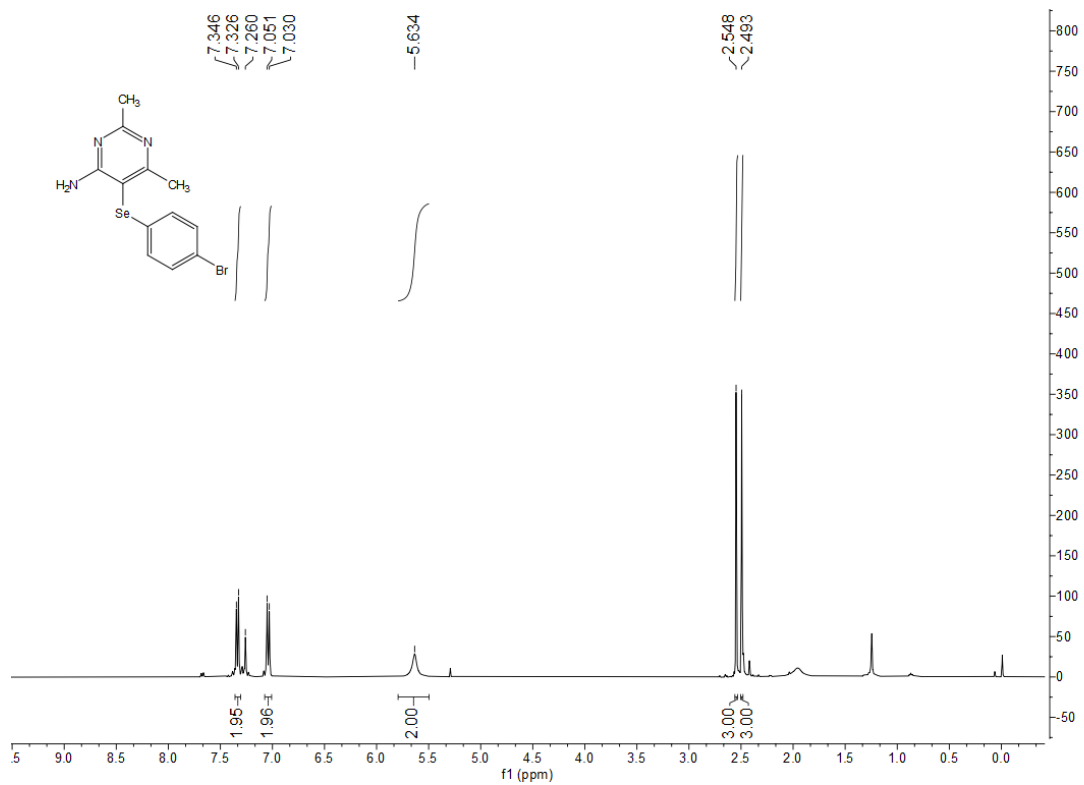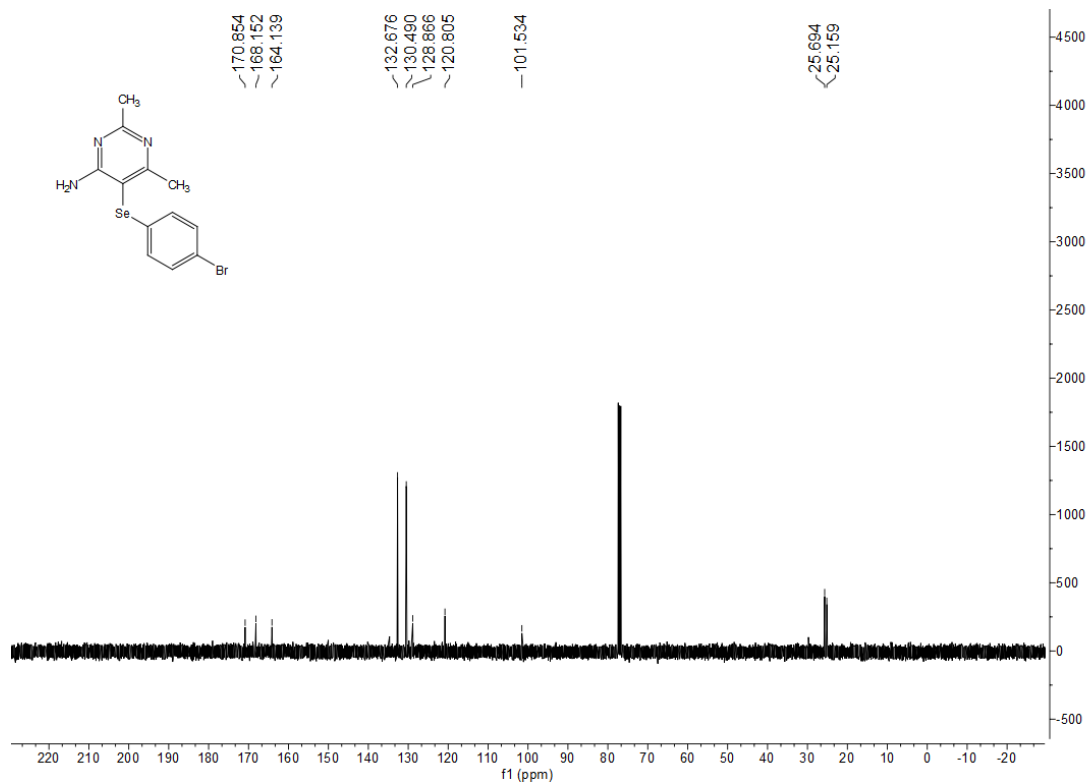

# Compound (20)

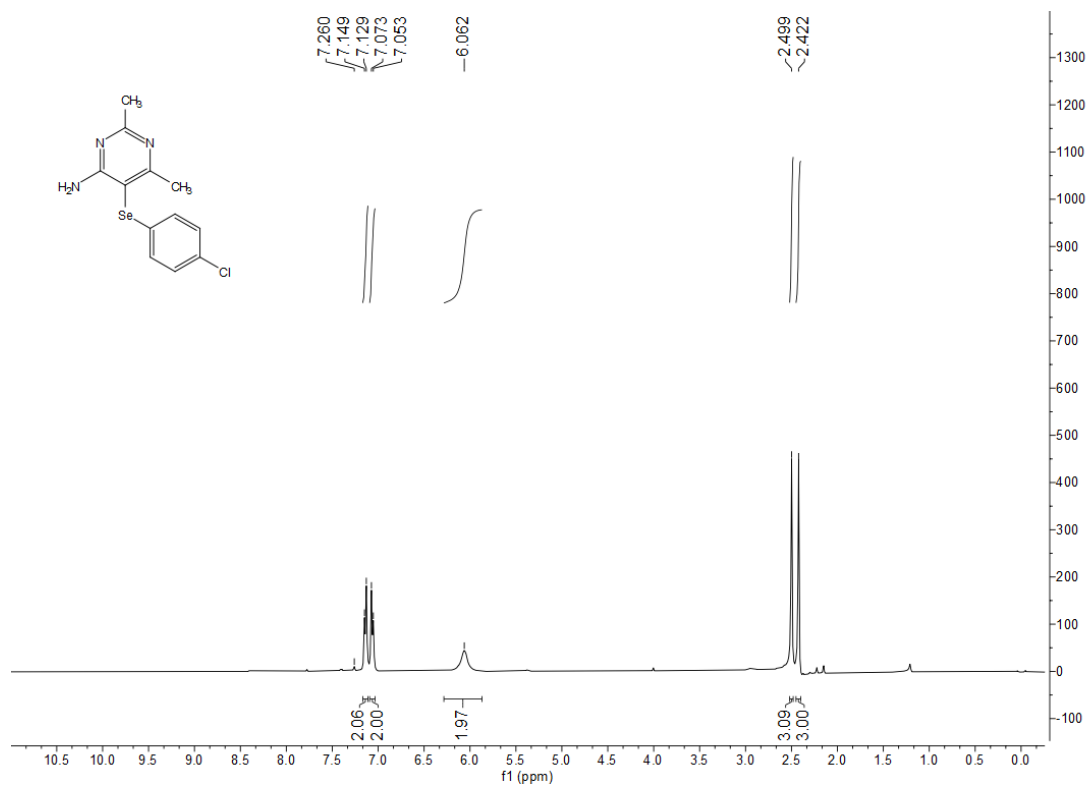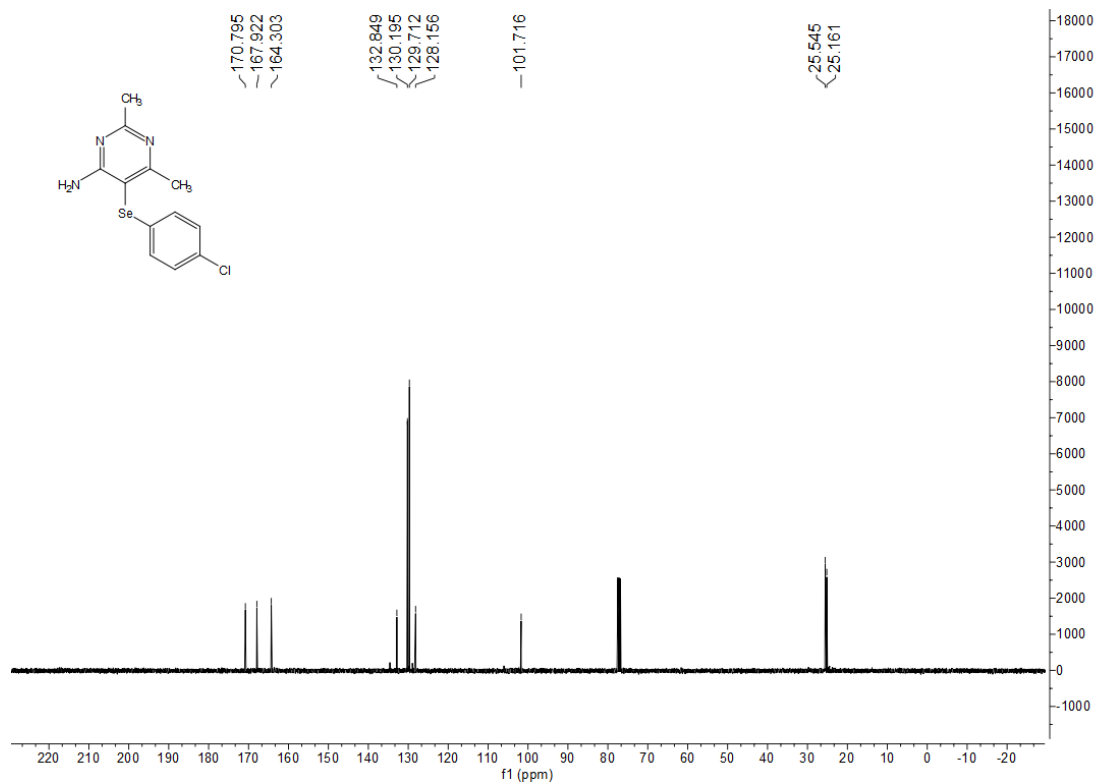

# Compound (21)

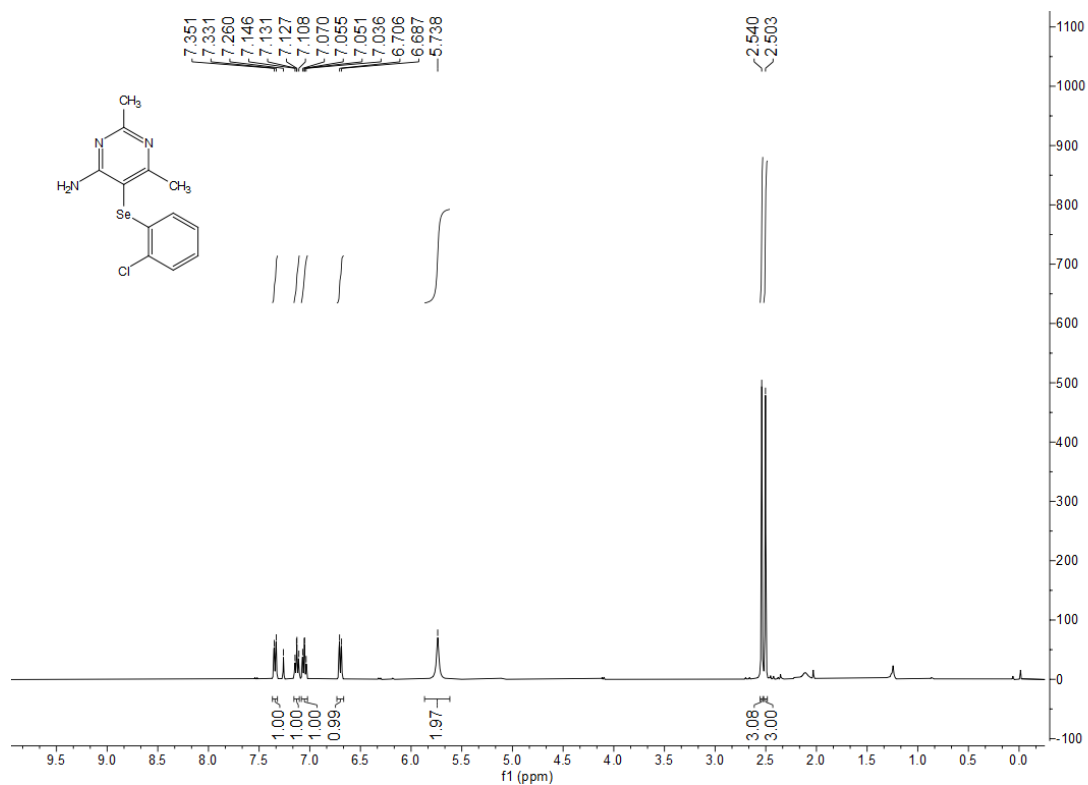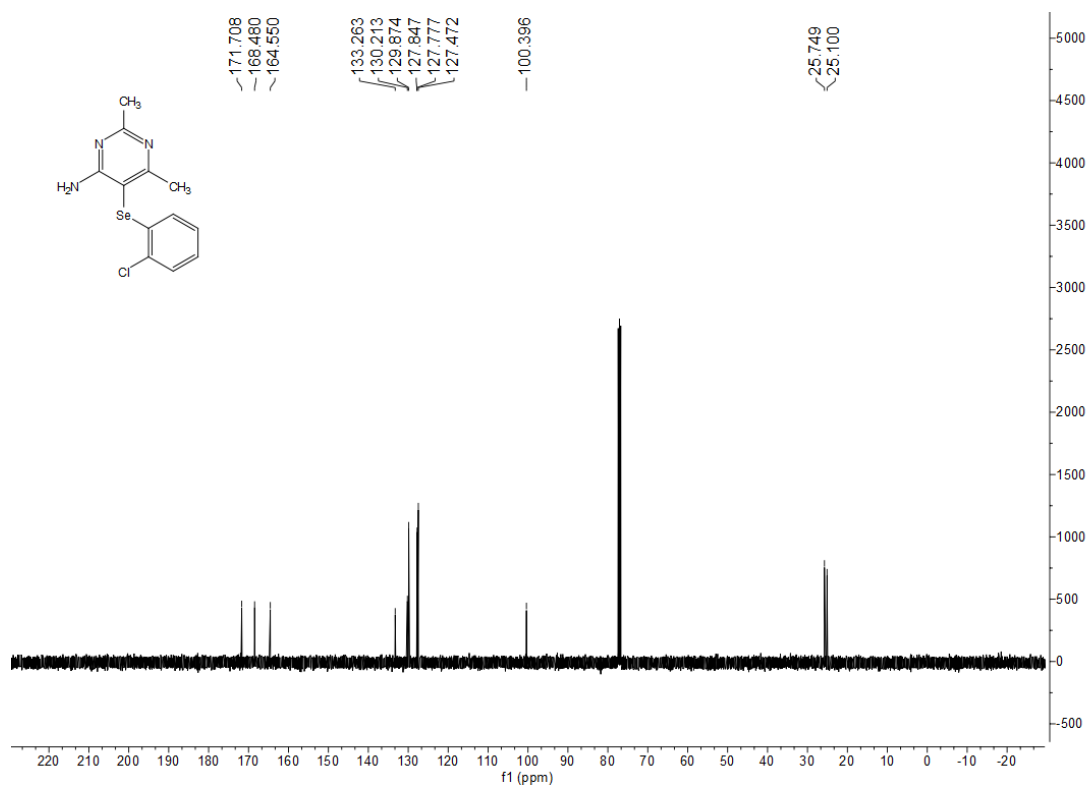



# Compound (22)

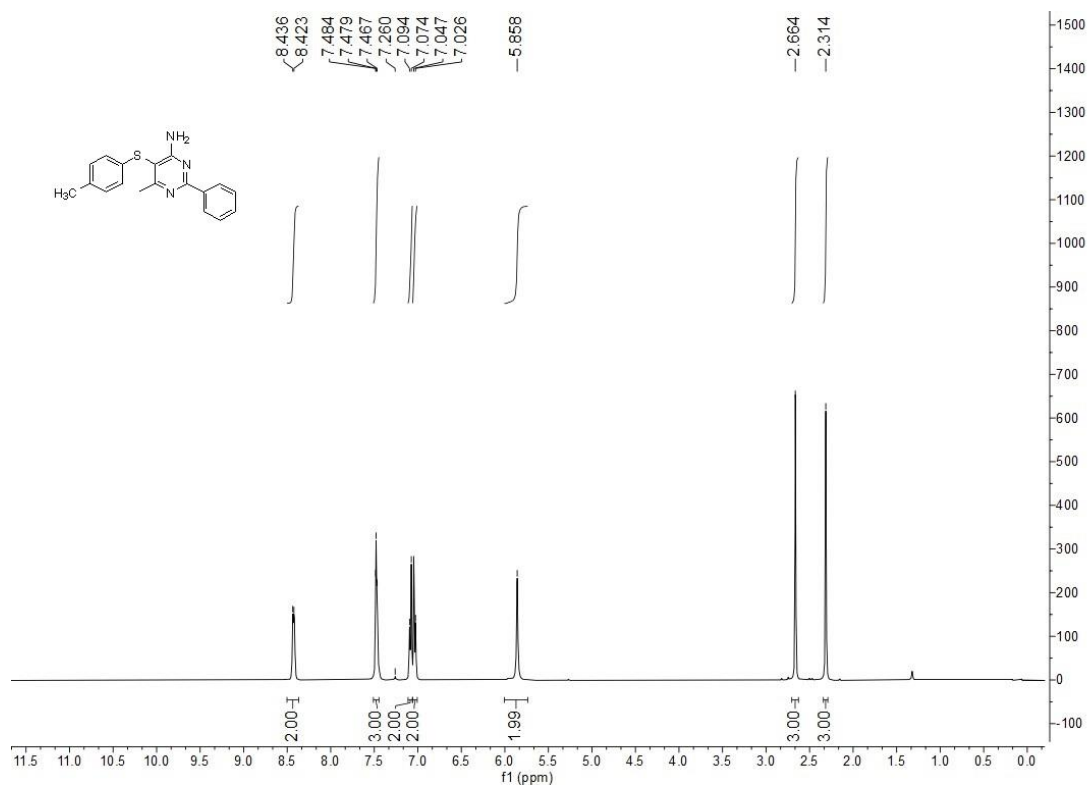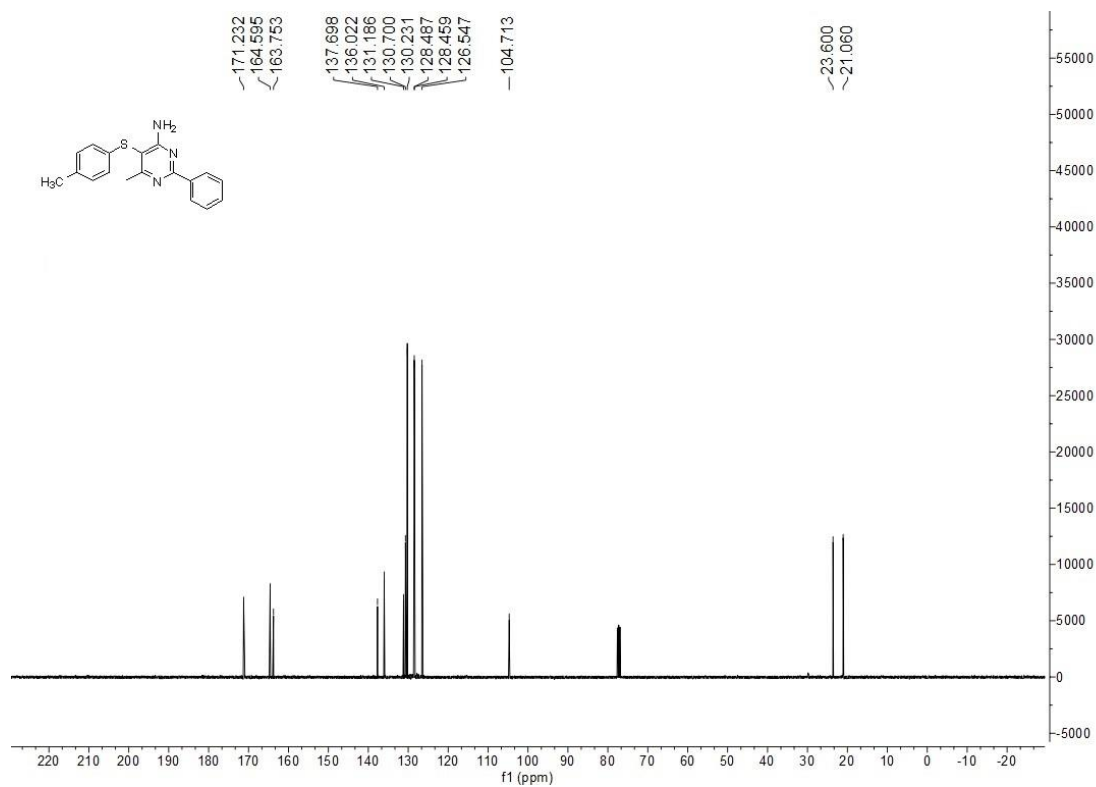

# Compound (23)

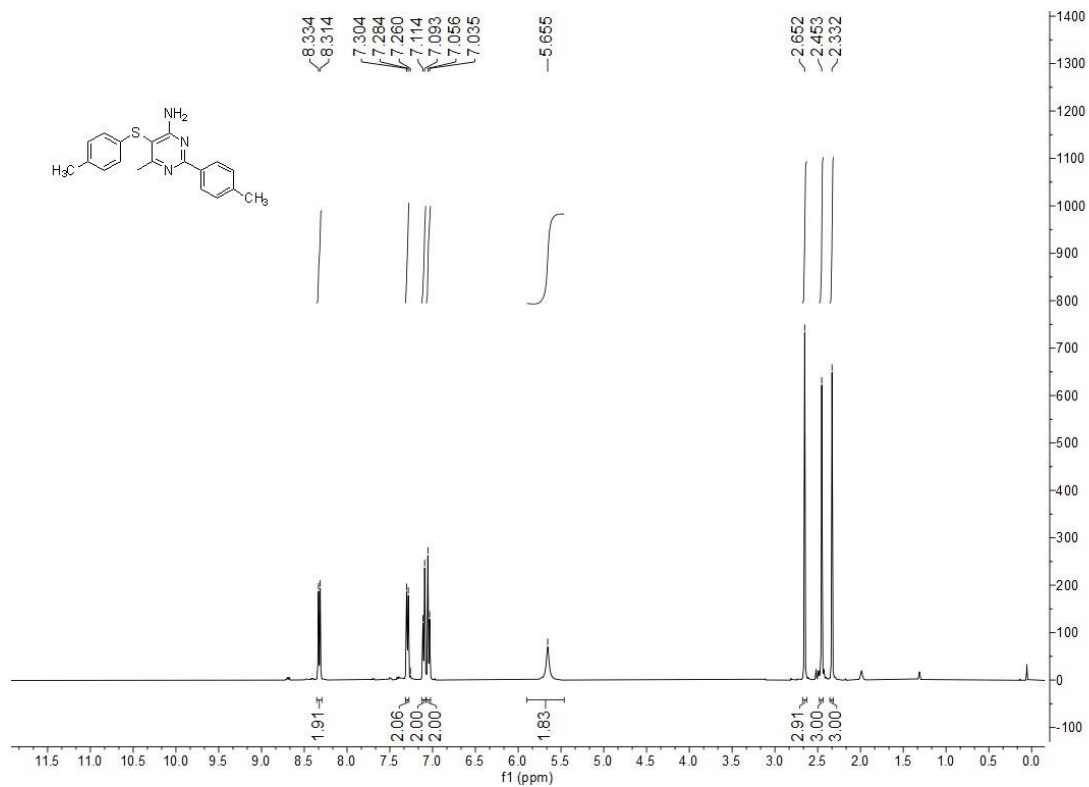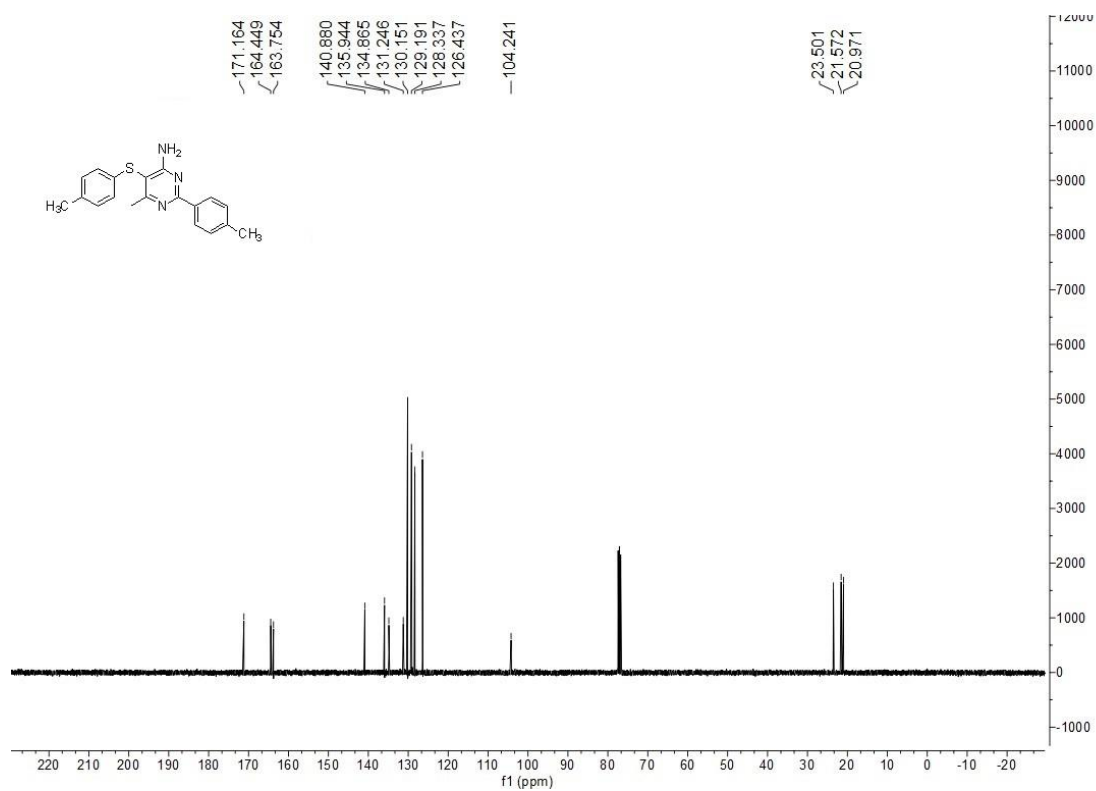

# Compound (24)

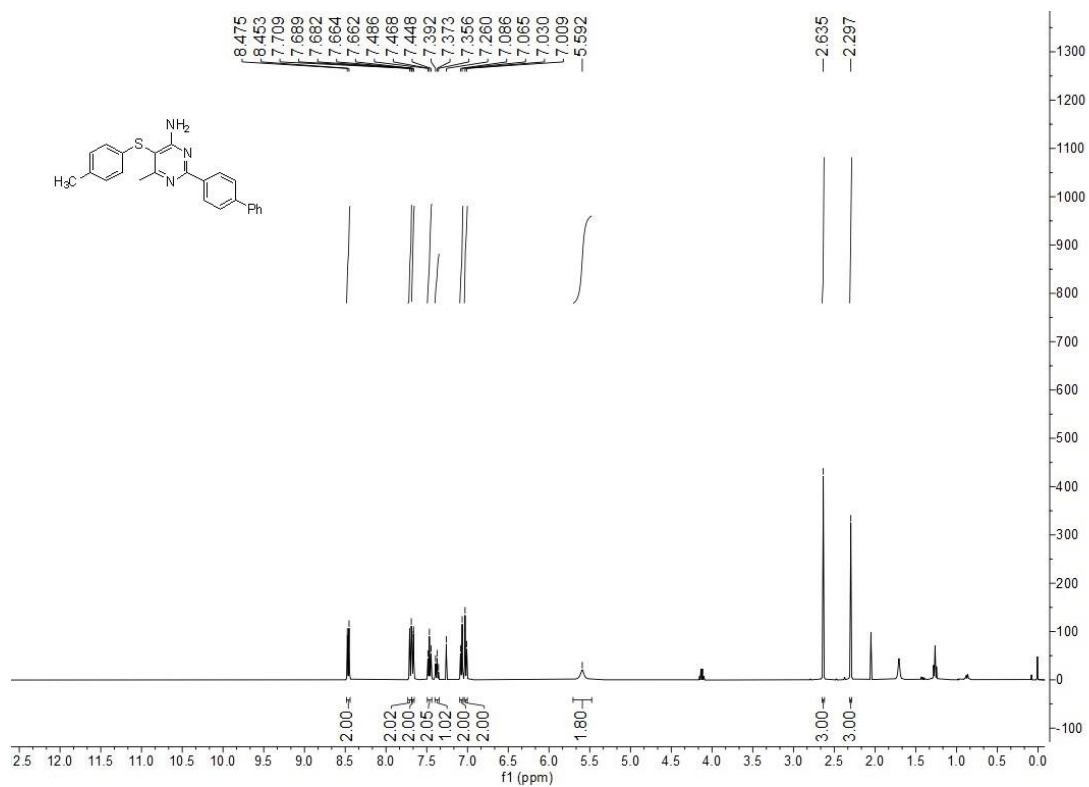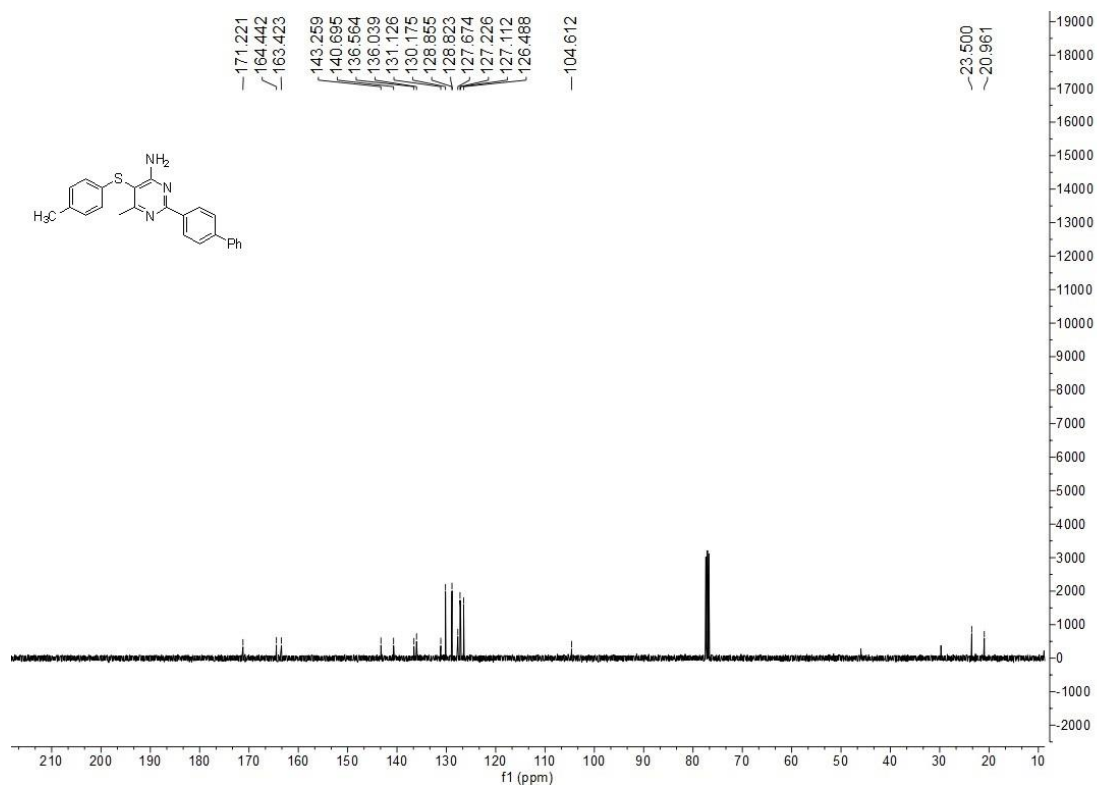

# Compound (25)

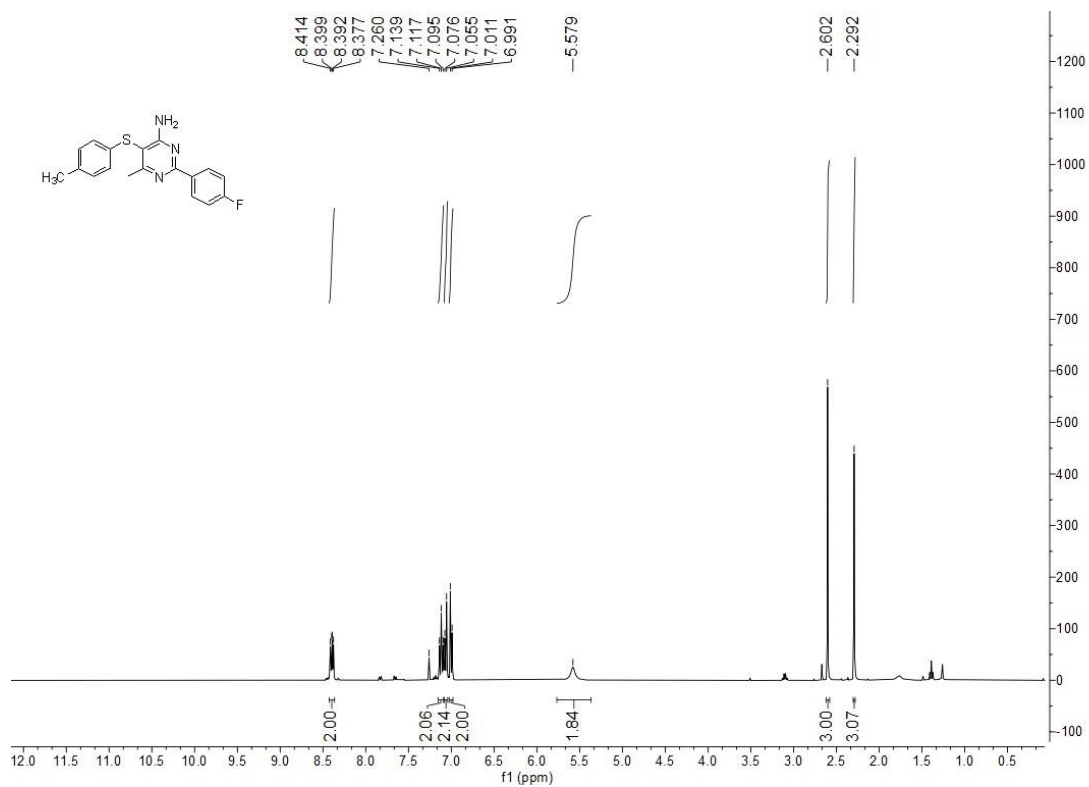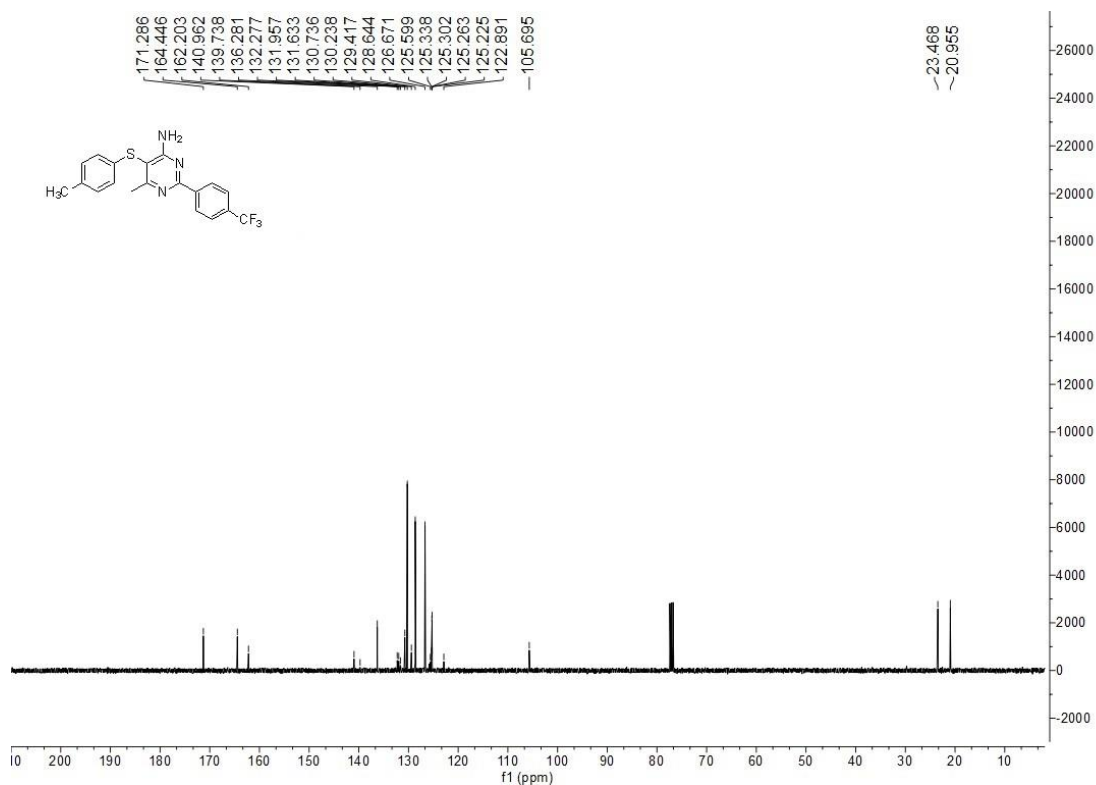

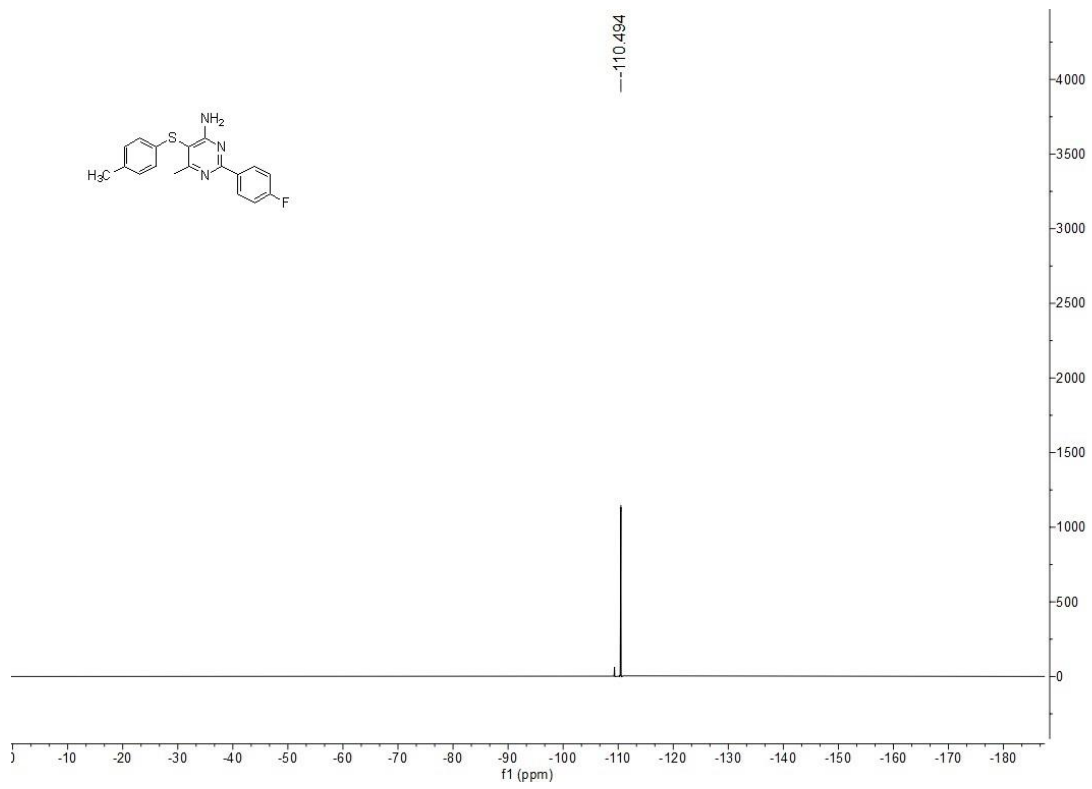

# Compound (26)

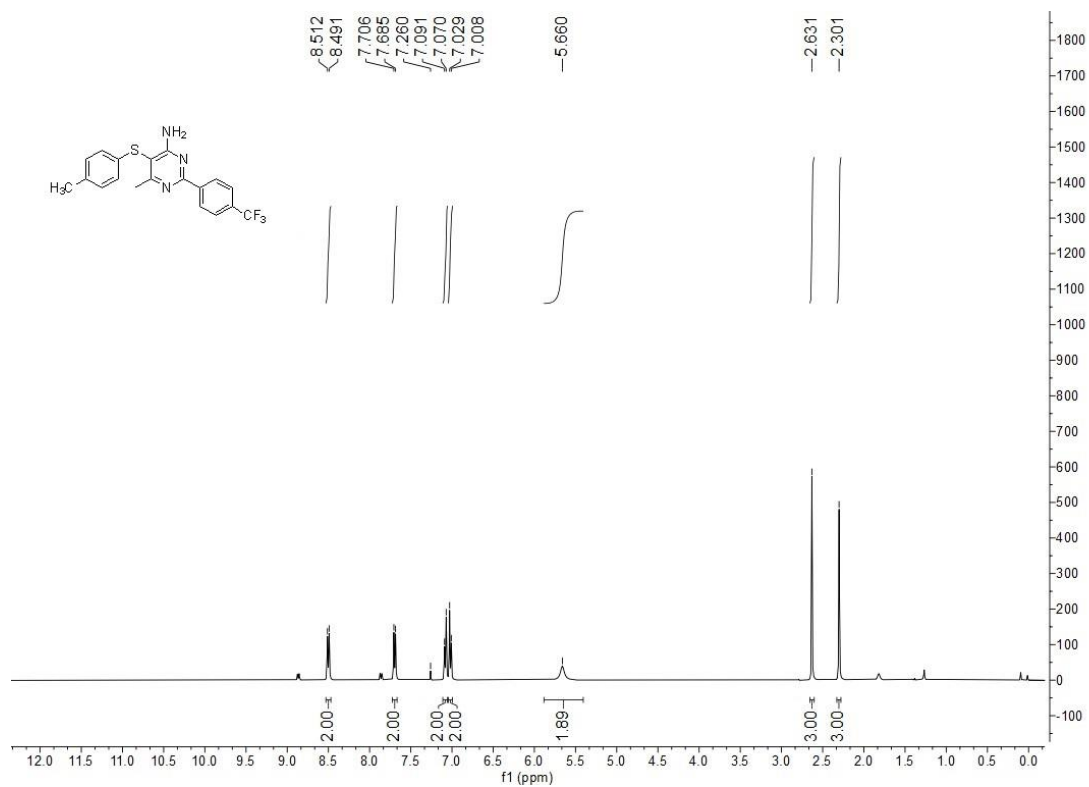

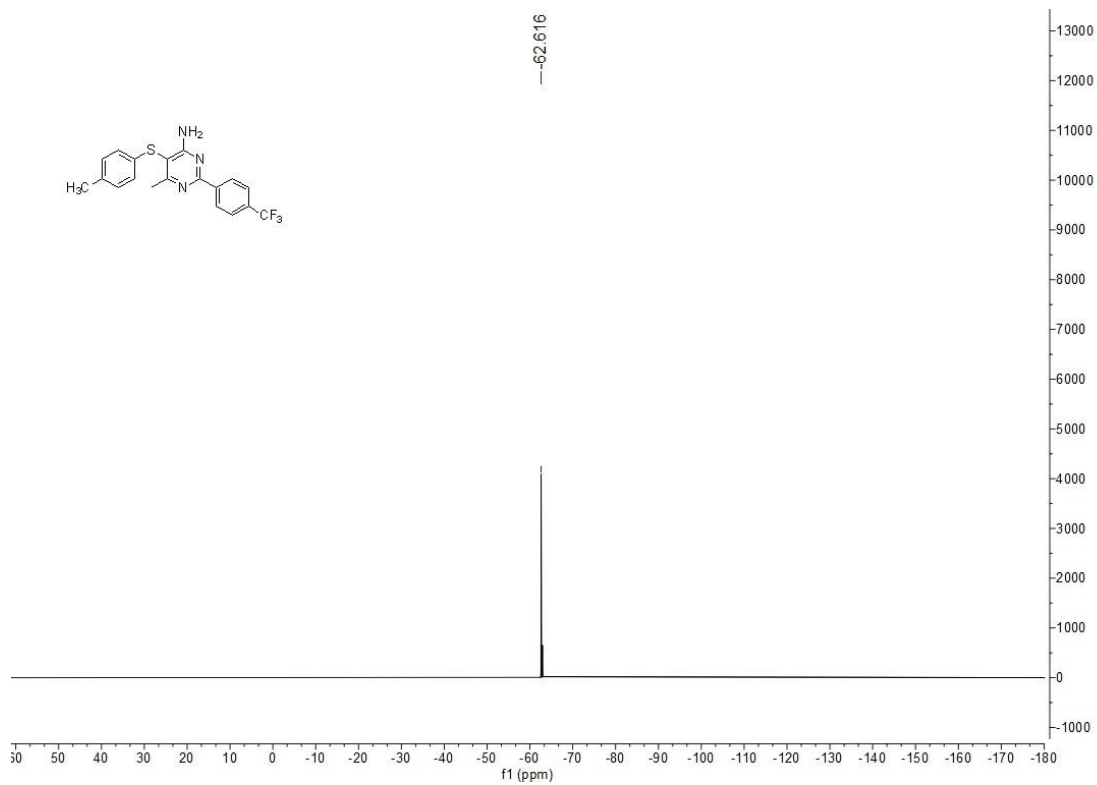

# Compound (27)

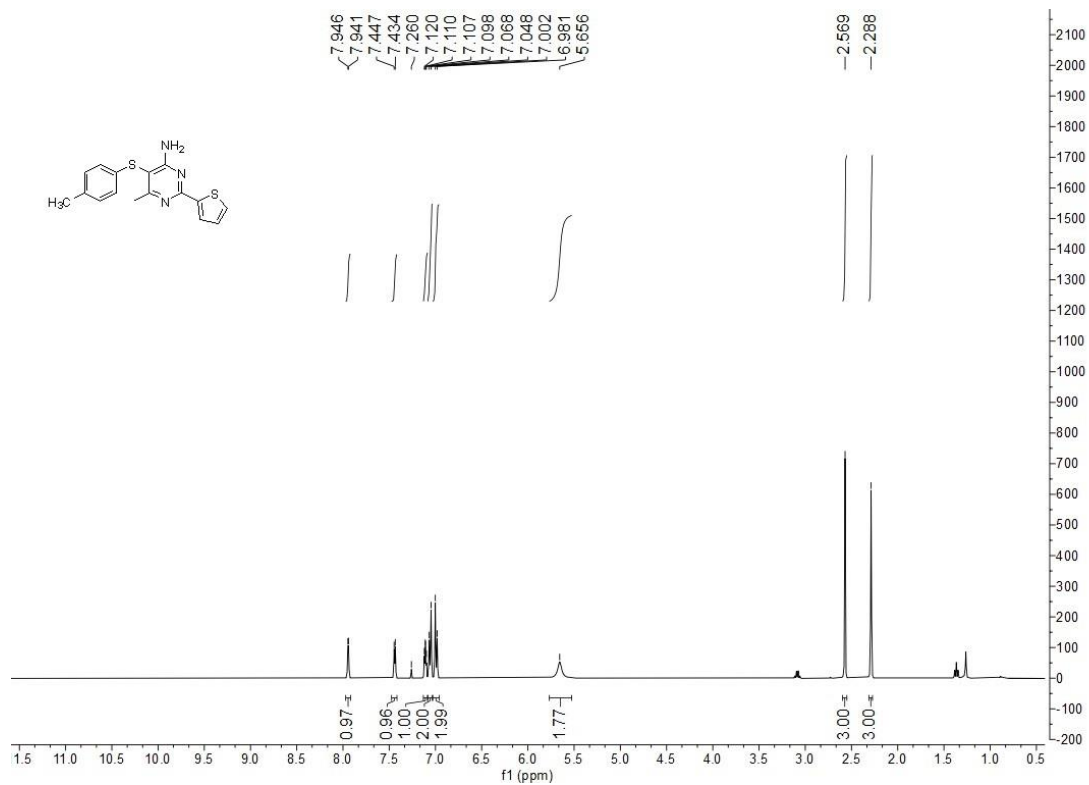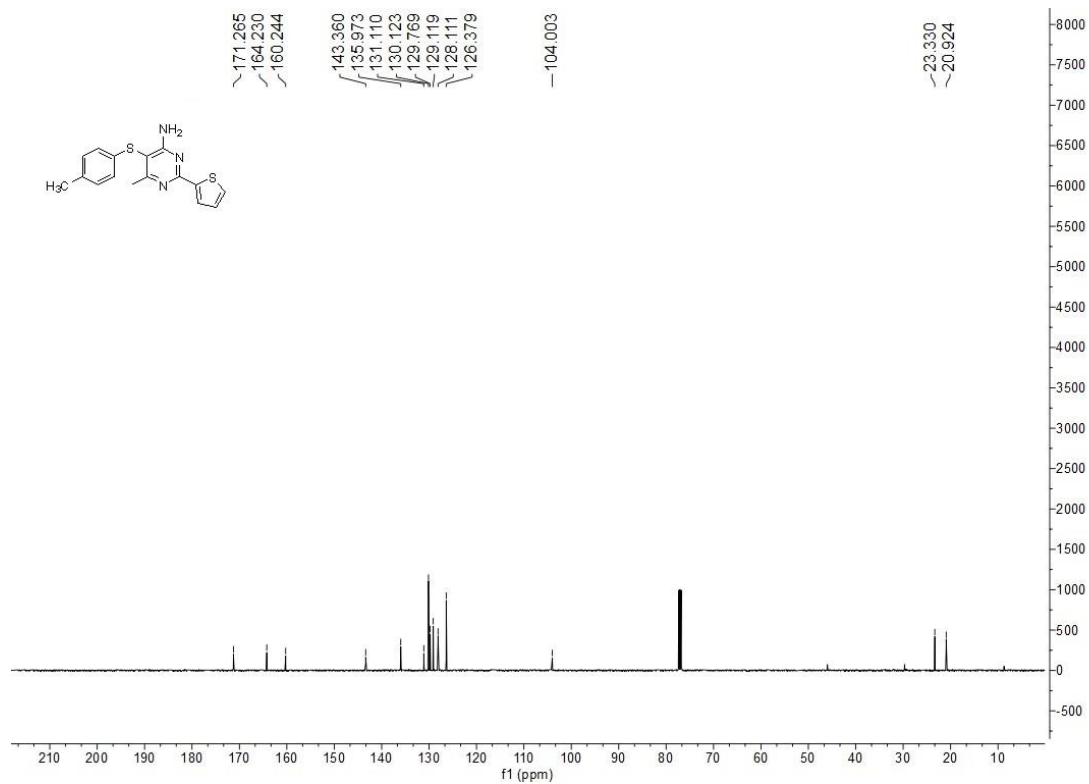



# Compound (28)

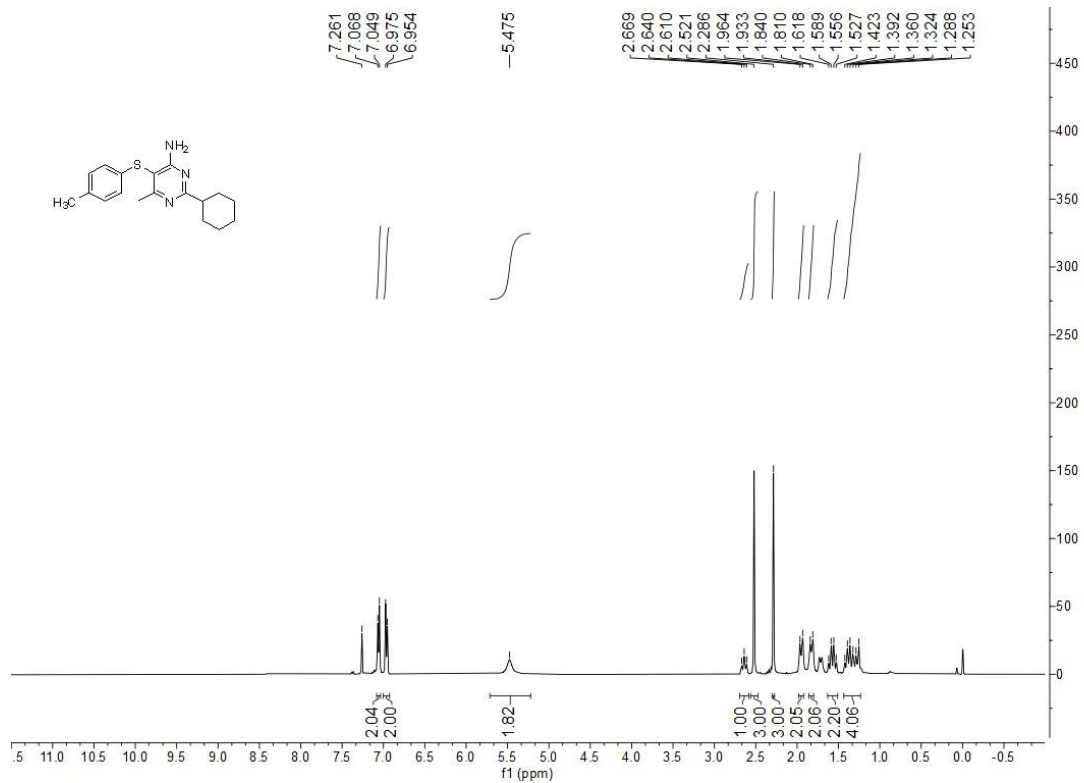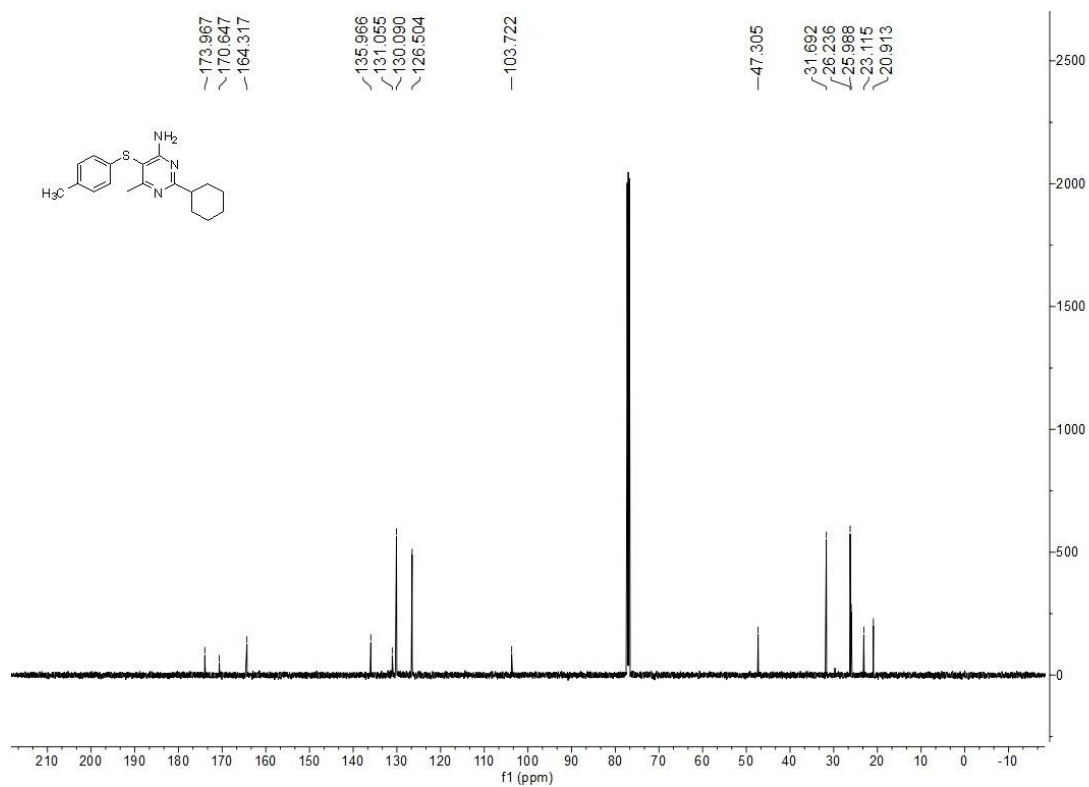

# Compound (29)

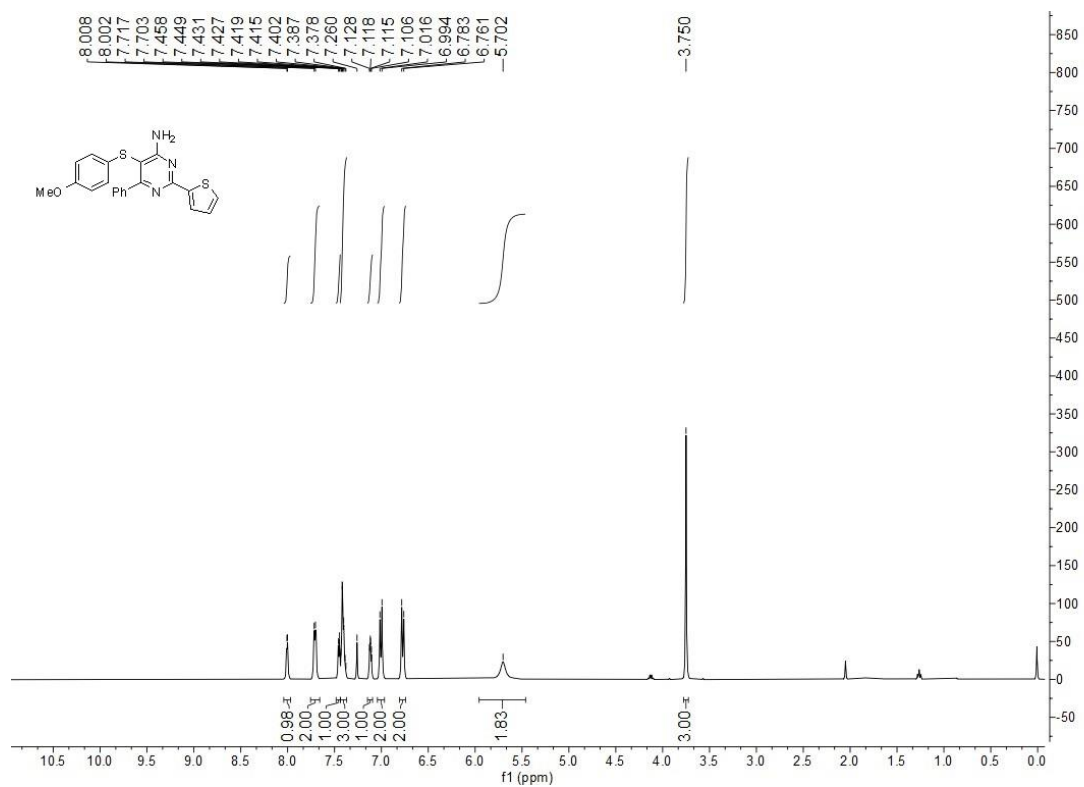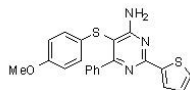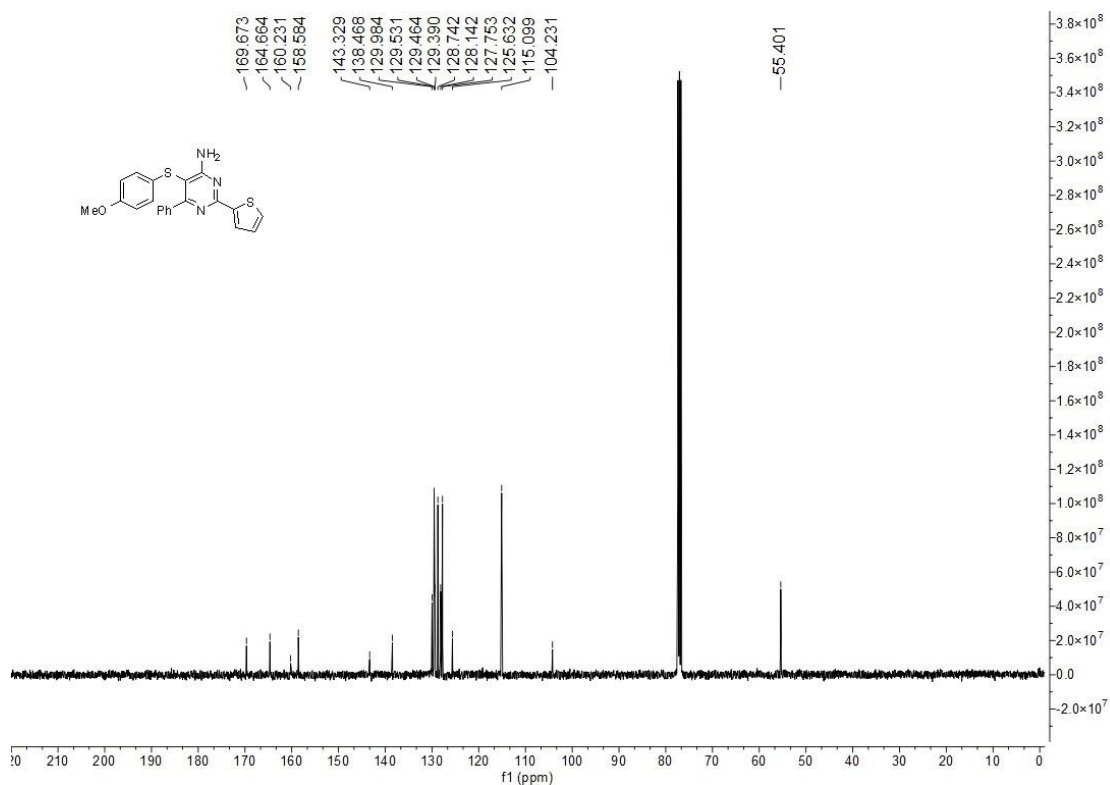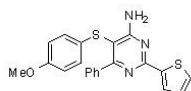

## 7. References

1. A. Alam, Y. Takaguchi and S. Tsuboi, *Synthetic Commun.*, 2005, **35**, 1329.
2. Y.-T. Ma, C. Lin, X.-B. Huang, M.-C. Liu, Y.-B. Zhou and H.-Y. Wu, *Chem. Commun.*, 2022, **58**, 6550.
